# Supplementary material for: CtBP impedes JNK- and Upd/STAT-driven cell fate misspecifications in regenerating Drosophila imaginal discs
Source: eLife journal article supplement (doi:10.7554/elife.30391), 2018-01-26

**A**

**Classes of cells:**

1. No FLP:  
no label

*Ubi<stop>GFP*  
*Act<stop>lacZ*

2. Low FLP:  
one label

*Ubi*  $\xrightarrow{\text{FLP}}$  *GFP*  
*Act<stop>lacZ*

*Ubi<stop>GFP*  
*Act*  $\xrightarrow{\text{FLP}}$  *lacZ*

3. High FLP:  
two labels

*Ubi*  $\xrightarrow{\text{FLP}}$  *GFP*  
*Act*  $\xrightarrow{\text{FLP}}$  *lacZ*

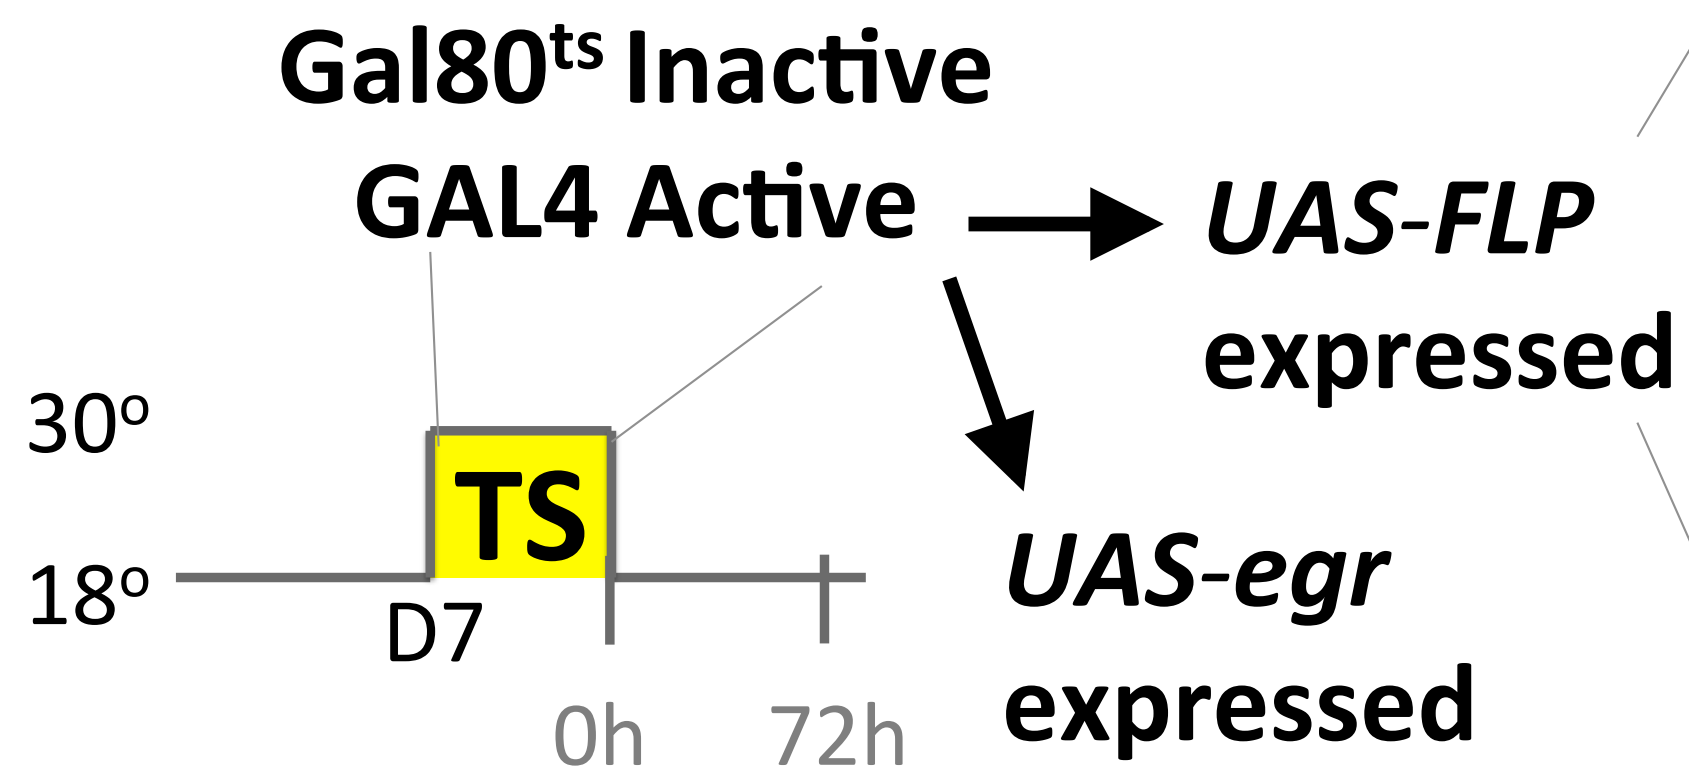

*rn<sup>ts</sup>>egr, >FLP, Ubi<stop>GFP<sup>nls</sup>, Act<stop>lacZ<sup>nls</sup>*

*CtBPQ229\*/+*

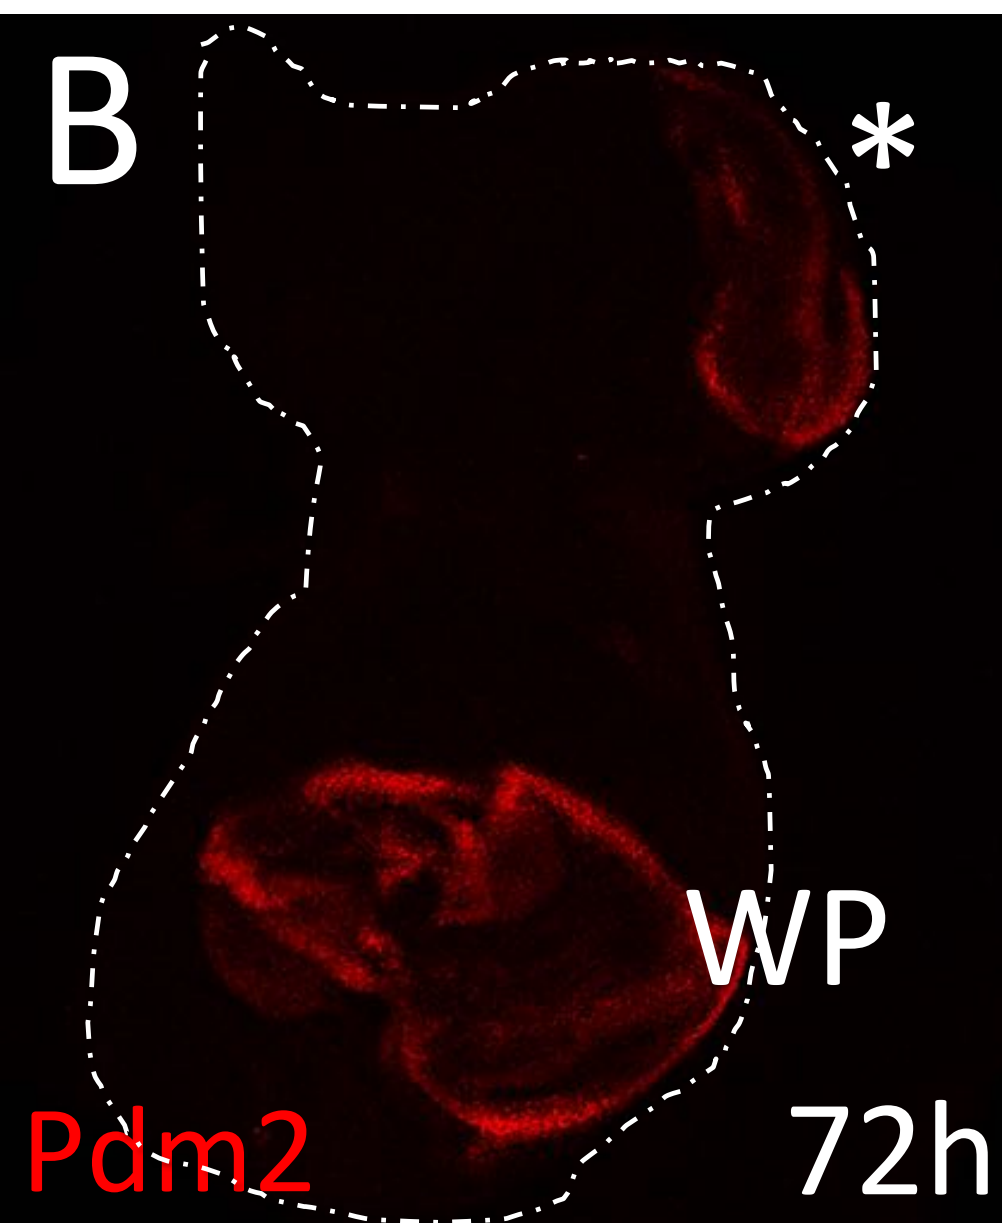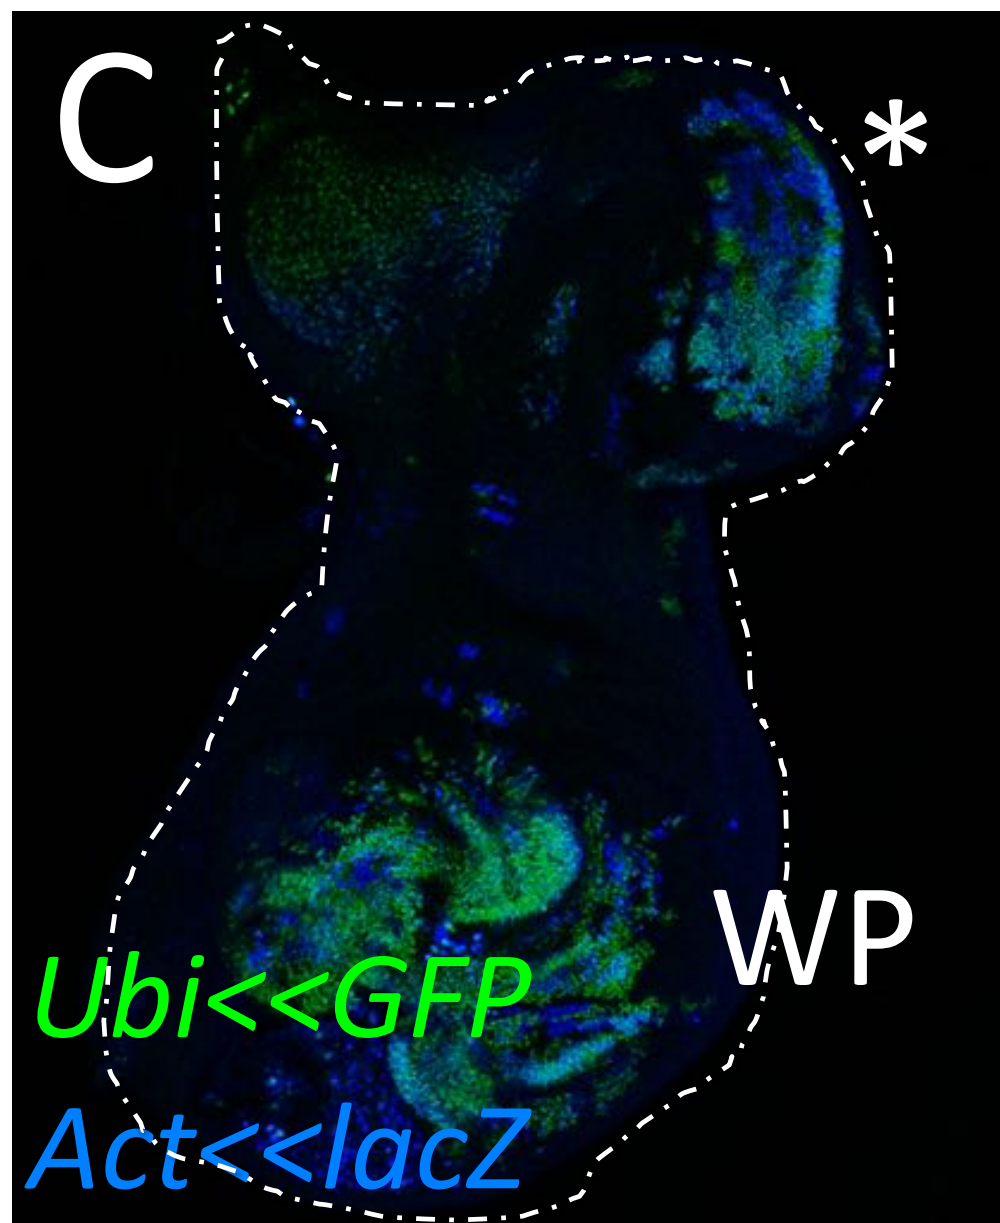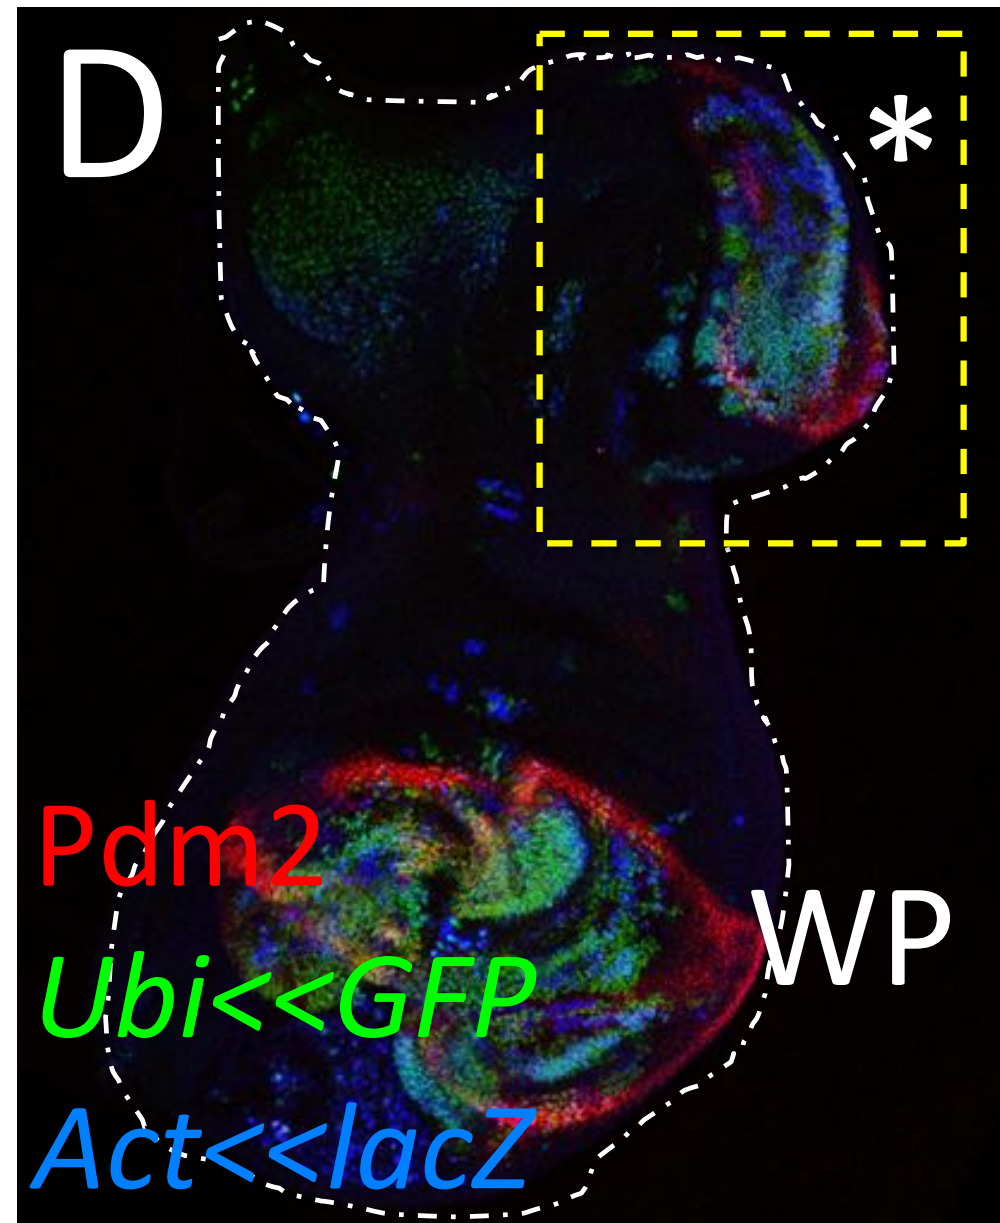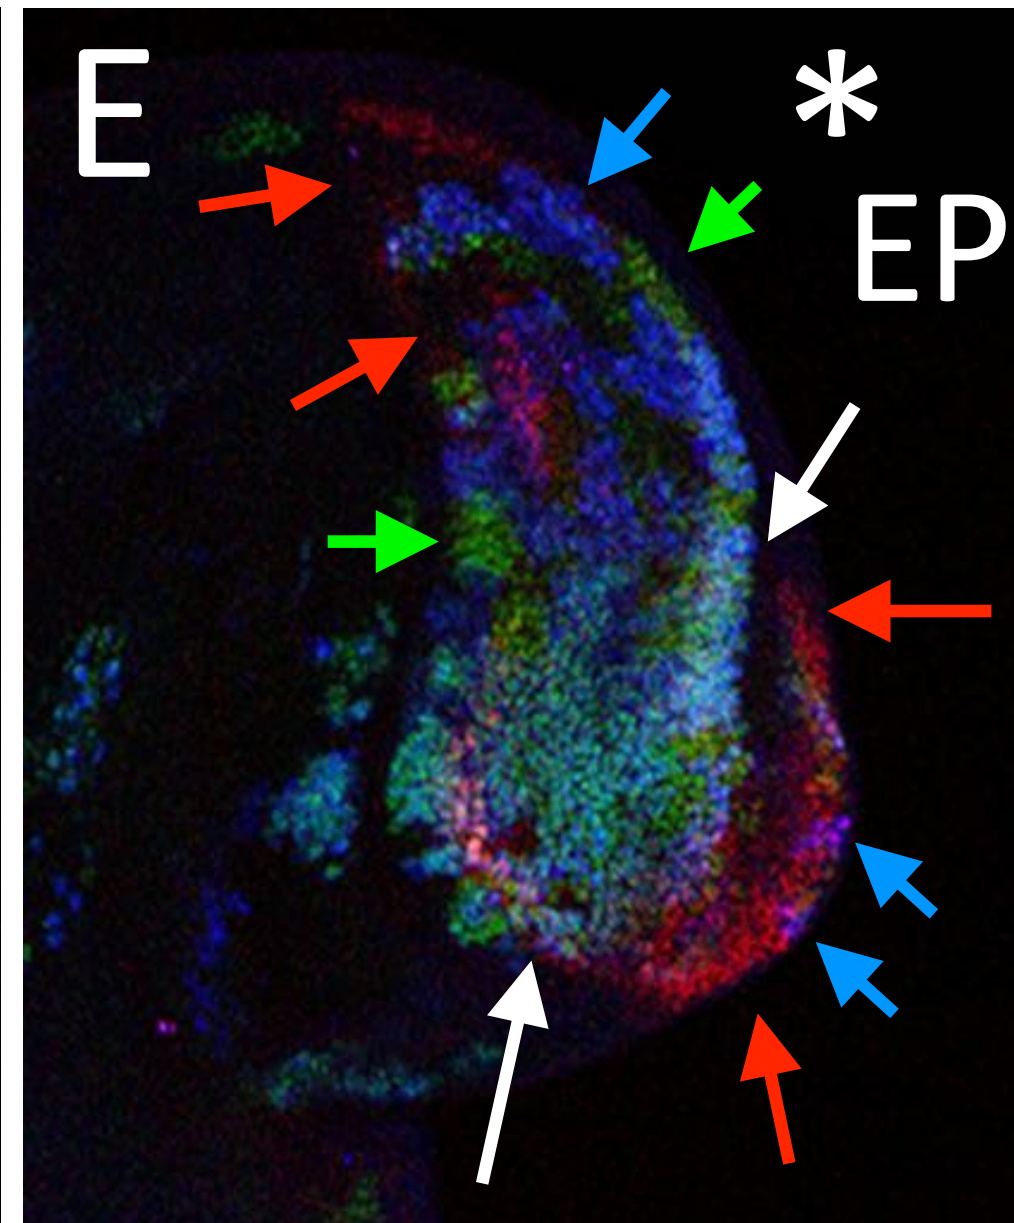

control

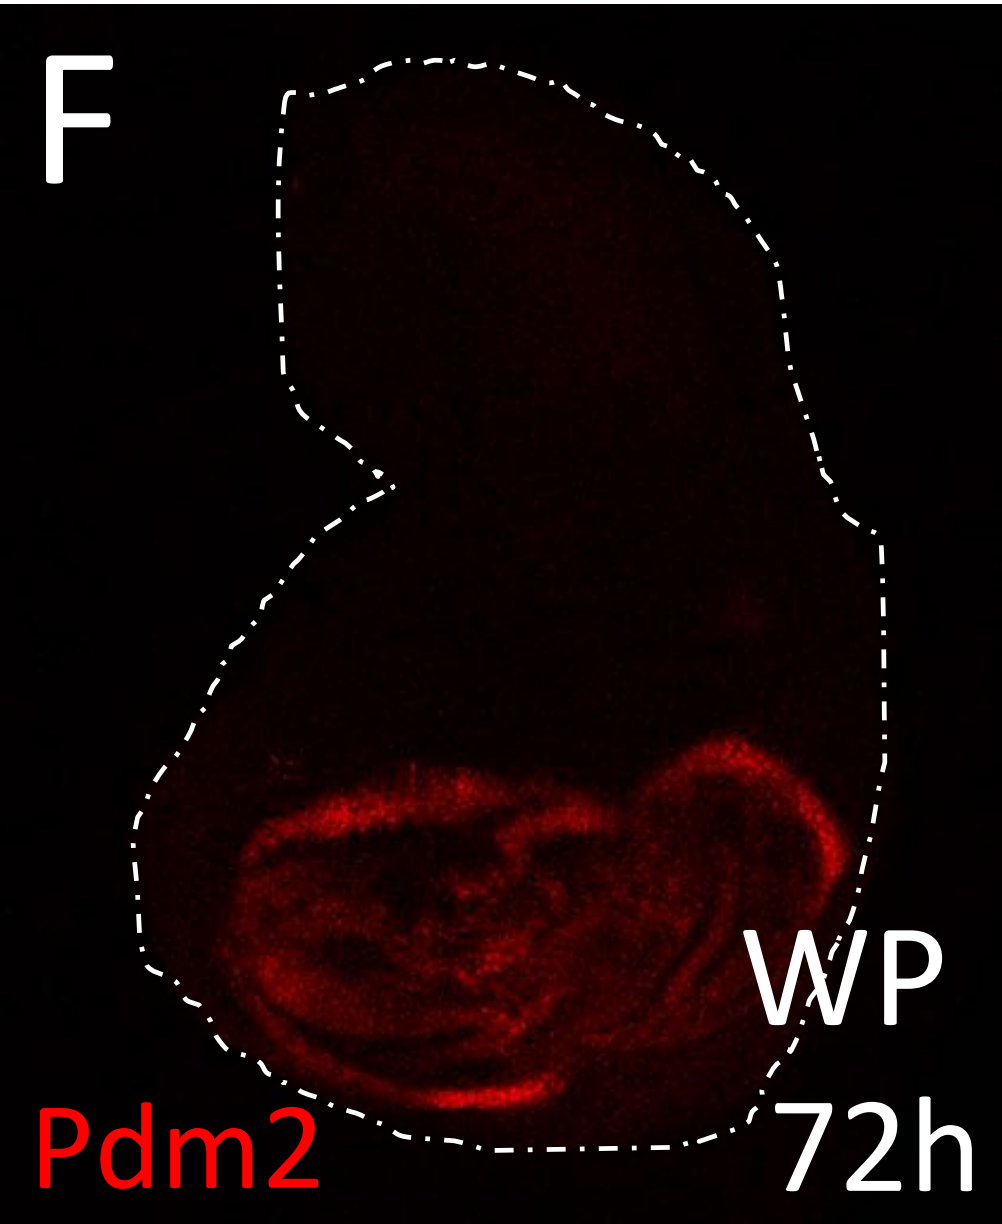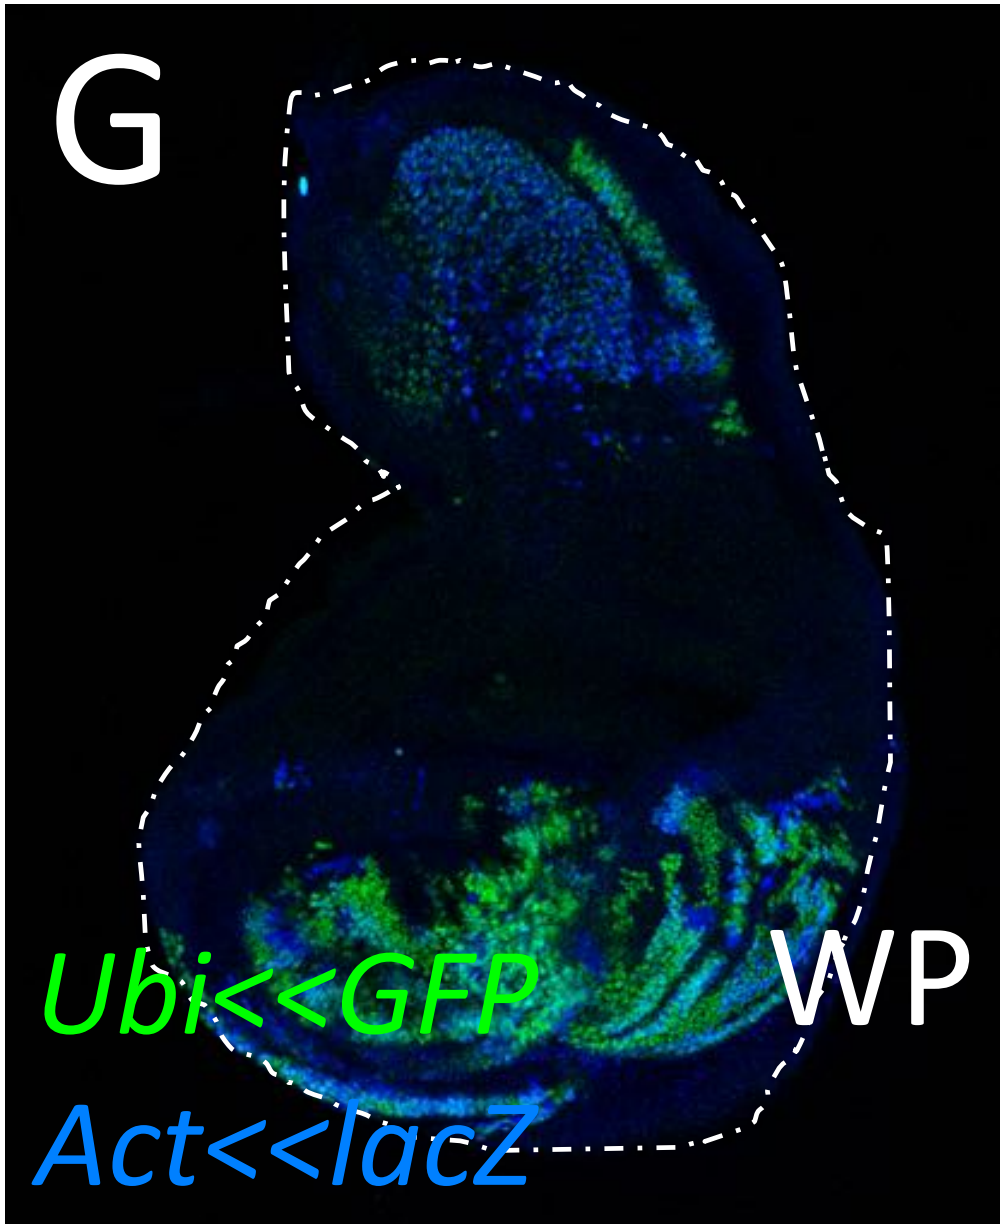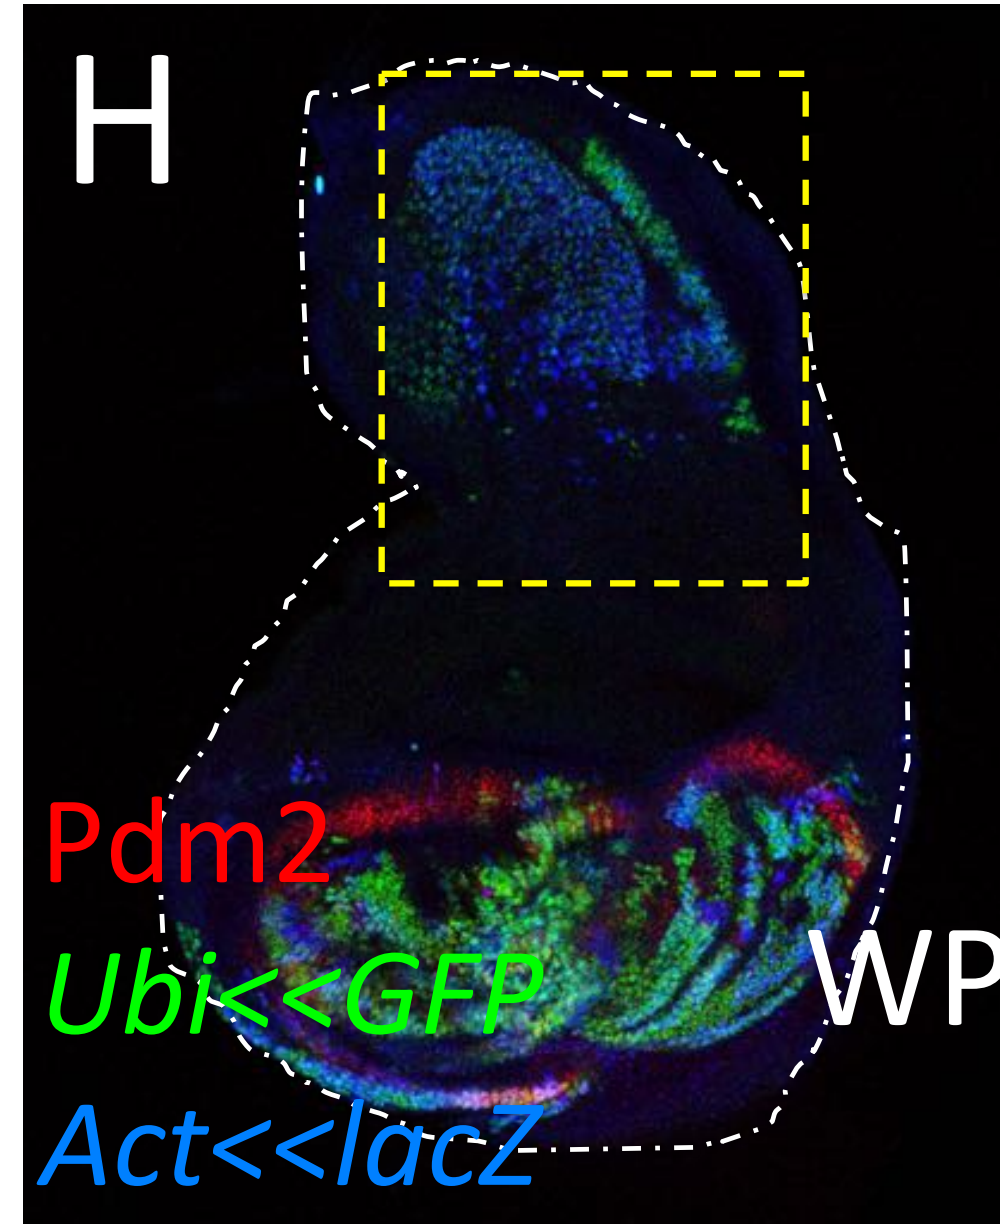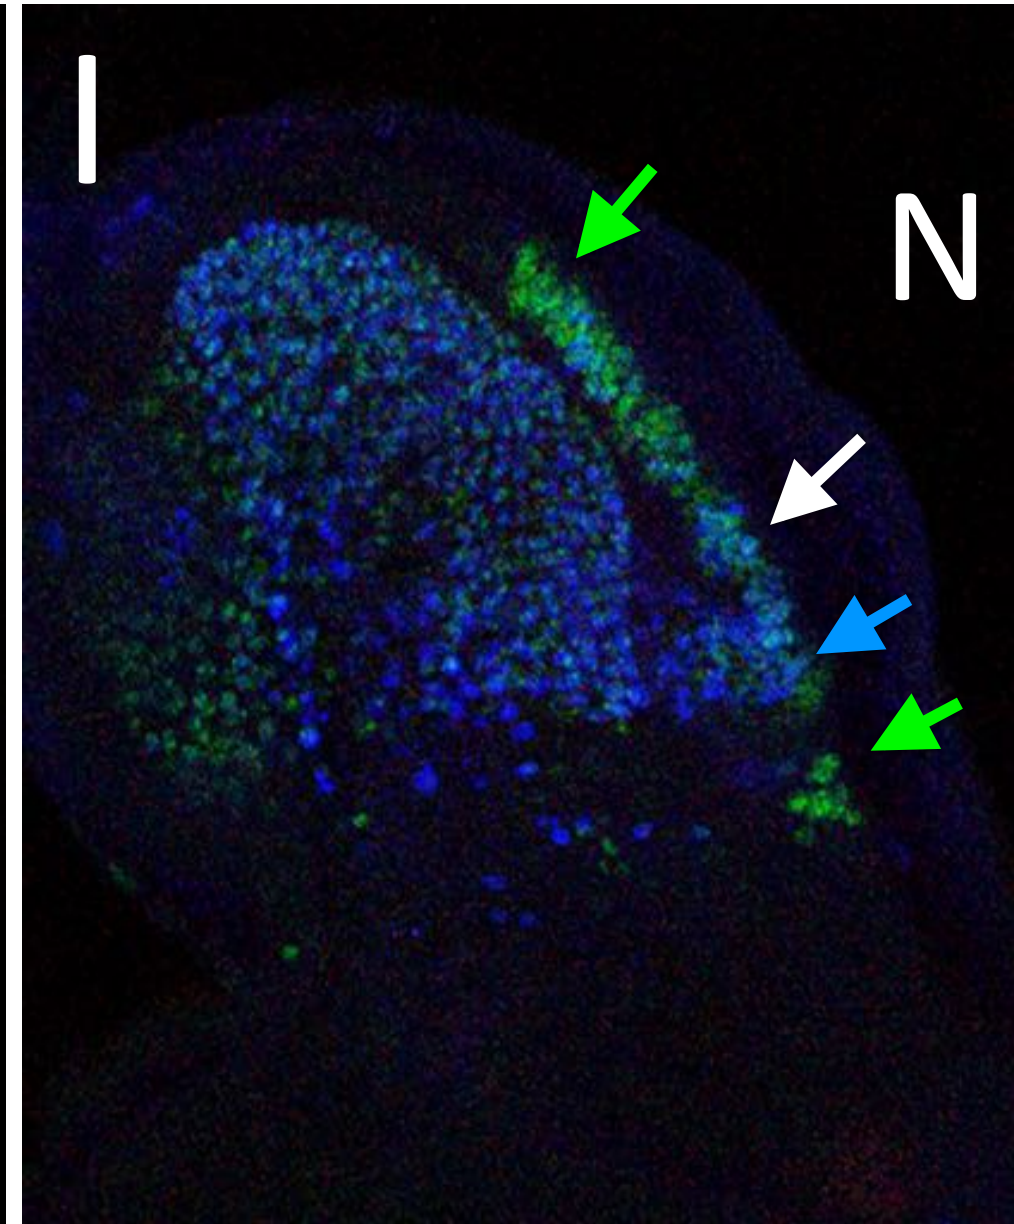

Supplement: supp [file elife-30391-supp-v1.zip]
