# Supplementary material for: CtBP impedes JNK- and Upd/STAT-driven cell fate misspecifications in regenerating Drosophila imaginal discs
Source: eLife journal article supplement (doi:10.7554/elife.30391), 2018-01-26
Supplement: supp [file elife-30391-supp-v1.zip]

*hs-FLP;; upd3-lacZ FRT82B RFP / FRT82B CtBP<sup>Q229\*</sup>*

A

wt

*CtBP*<sup>-/-</sup>

*upd3-lacZ*

RFP

A'

*upd3-lacZ*
