# Supplementary figures and images for: CtBP impedes JNK- and Upd/STAT-driven cell fate misspecifications in regenerating Drosophila imaginal discs
Source: eLife journal article supplement (doi:10.7554/elife.30391), 2018-01-26

*rn<sup>ts</sup>>egr* damaged

*dilp8<sup>M100727</sup>, CtBP<sup>Q229\*</sup>/+*

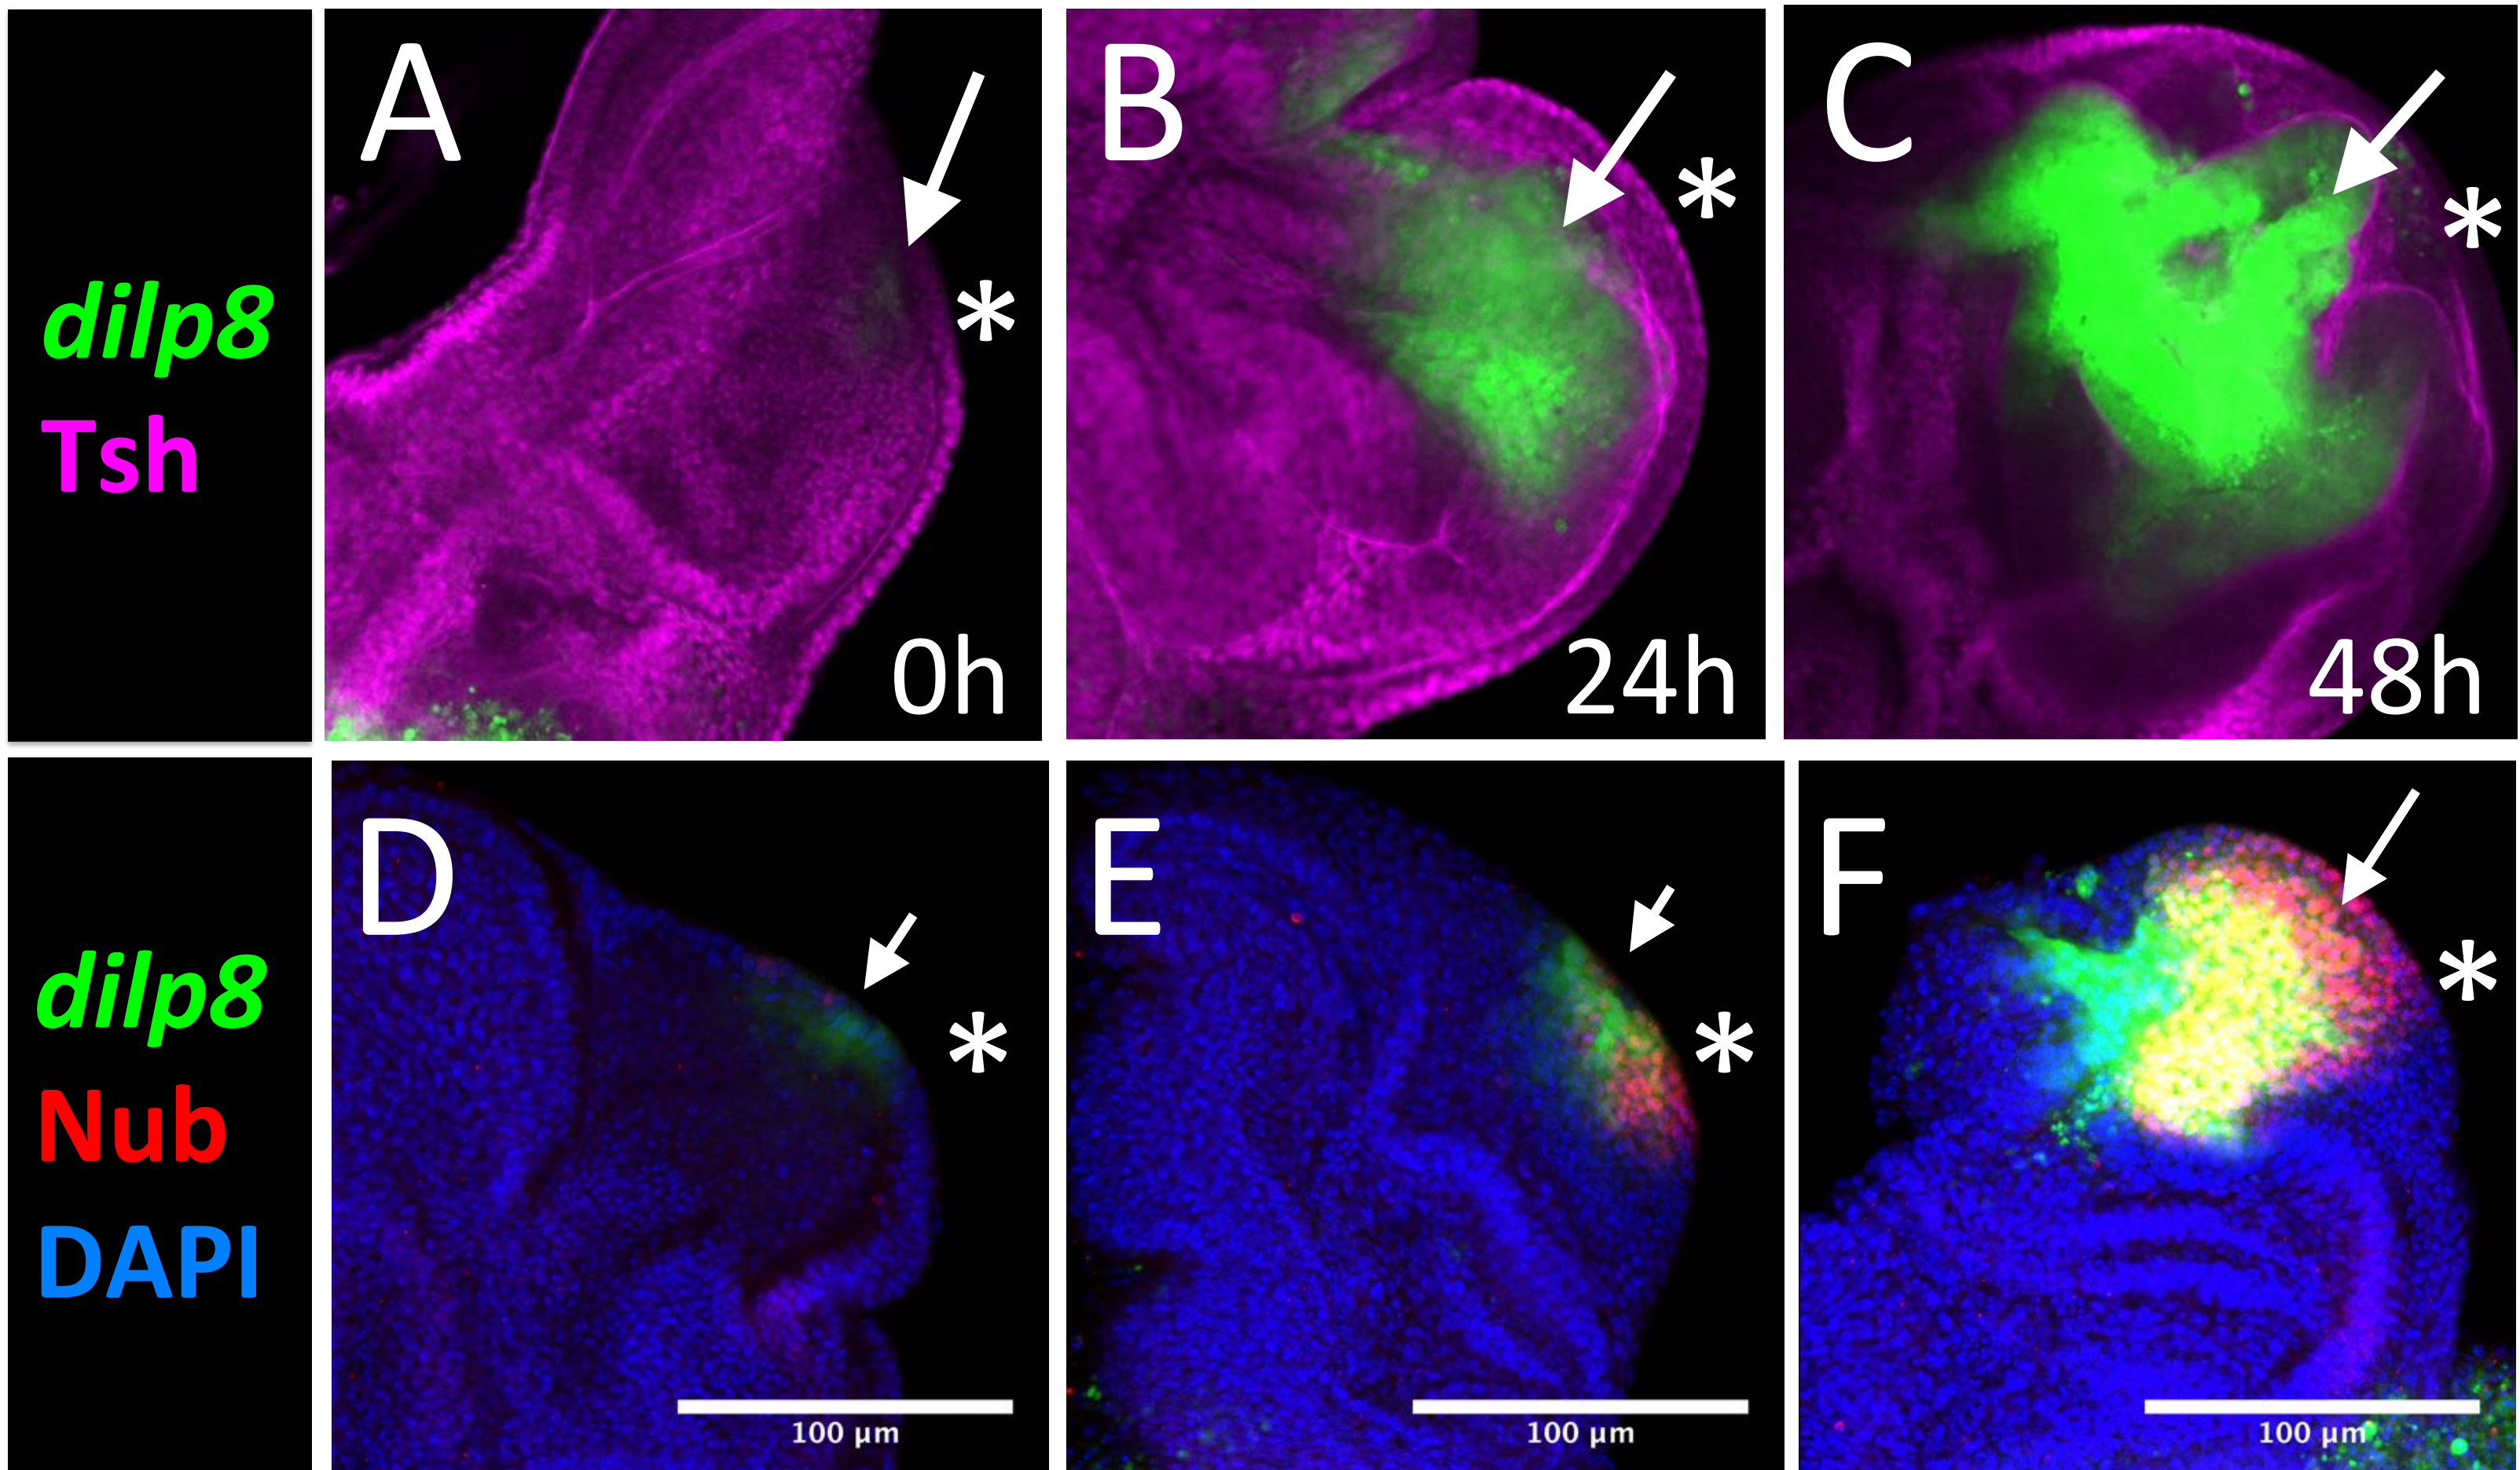

G

Formation of Ectopic wing pouch

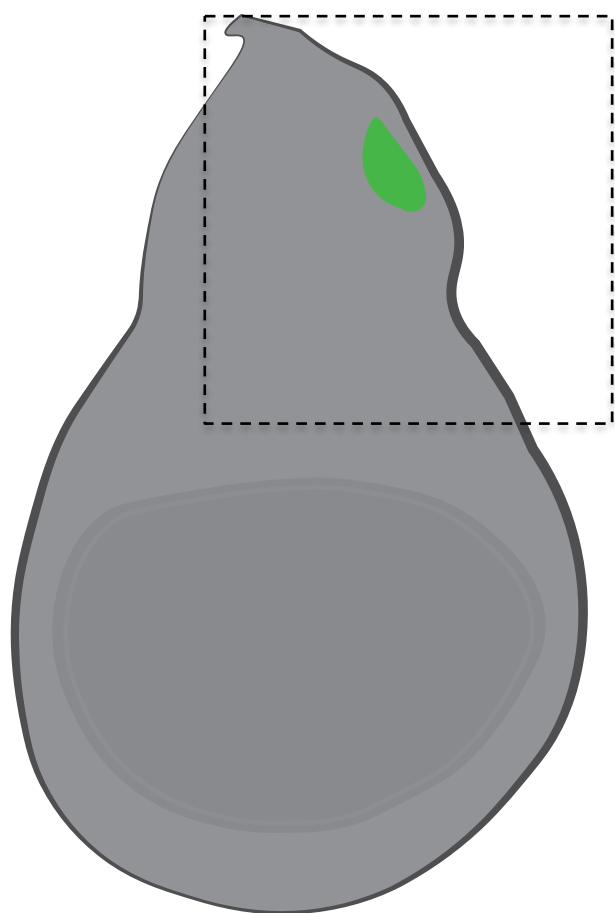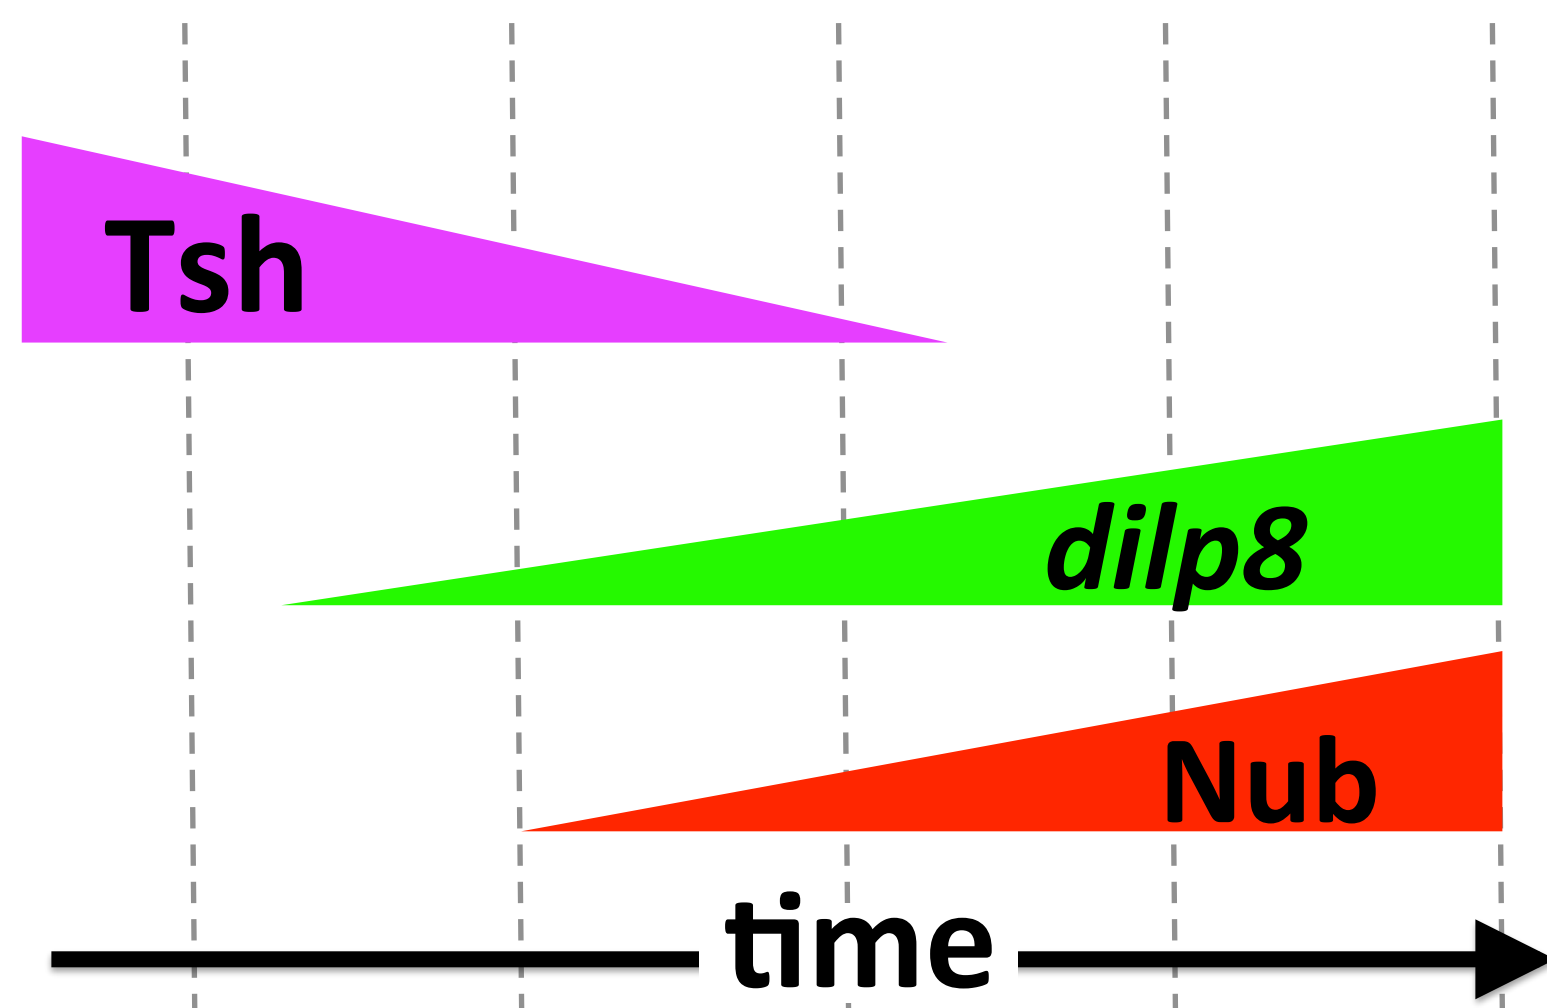

Supplement: supp [file elife-30391-supp-v1.zip]

**A*****rn<sup>ts</sup> > egr***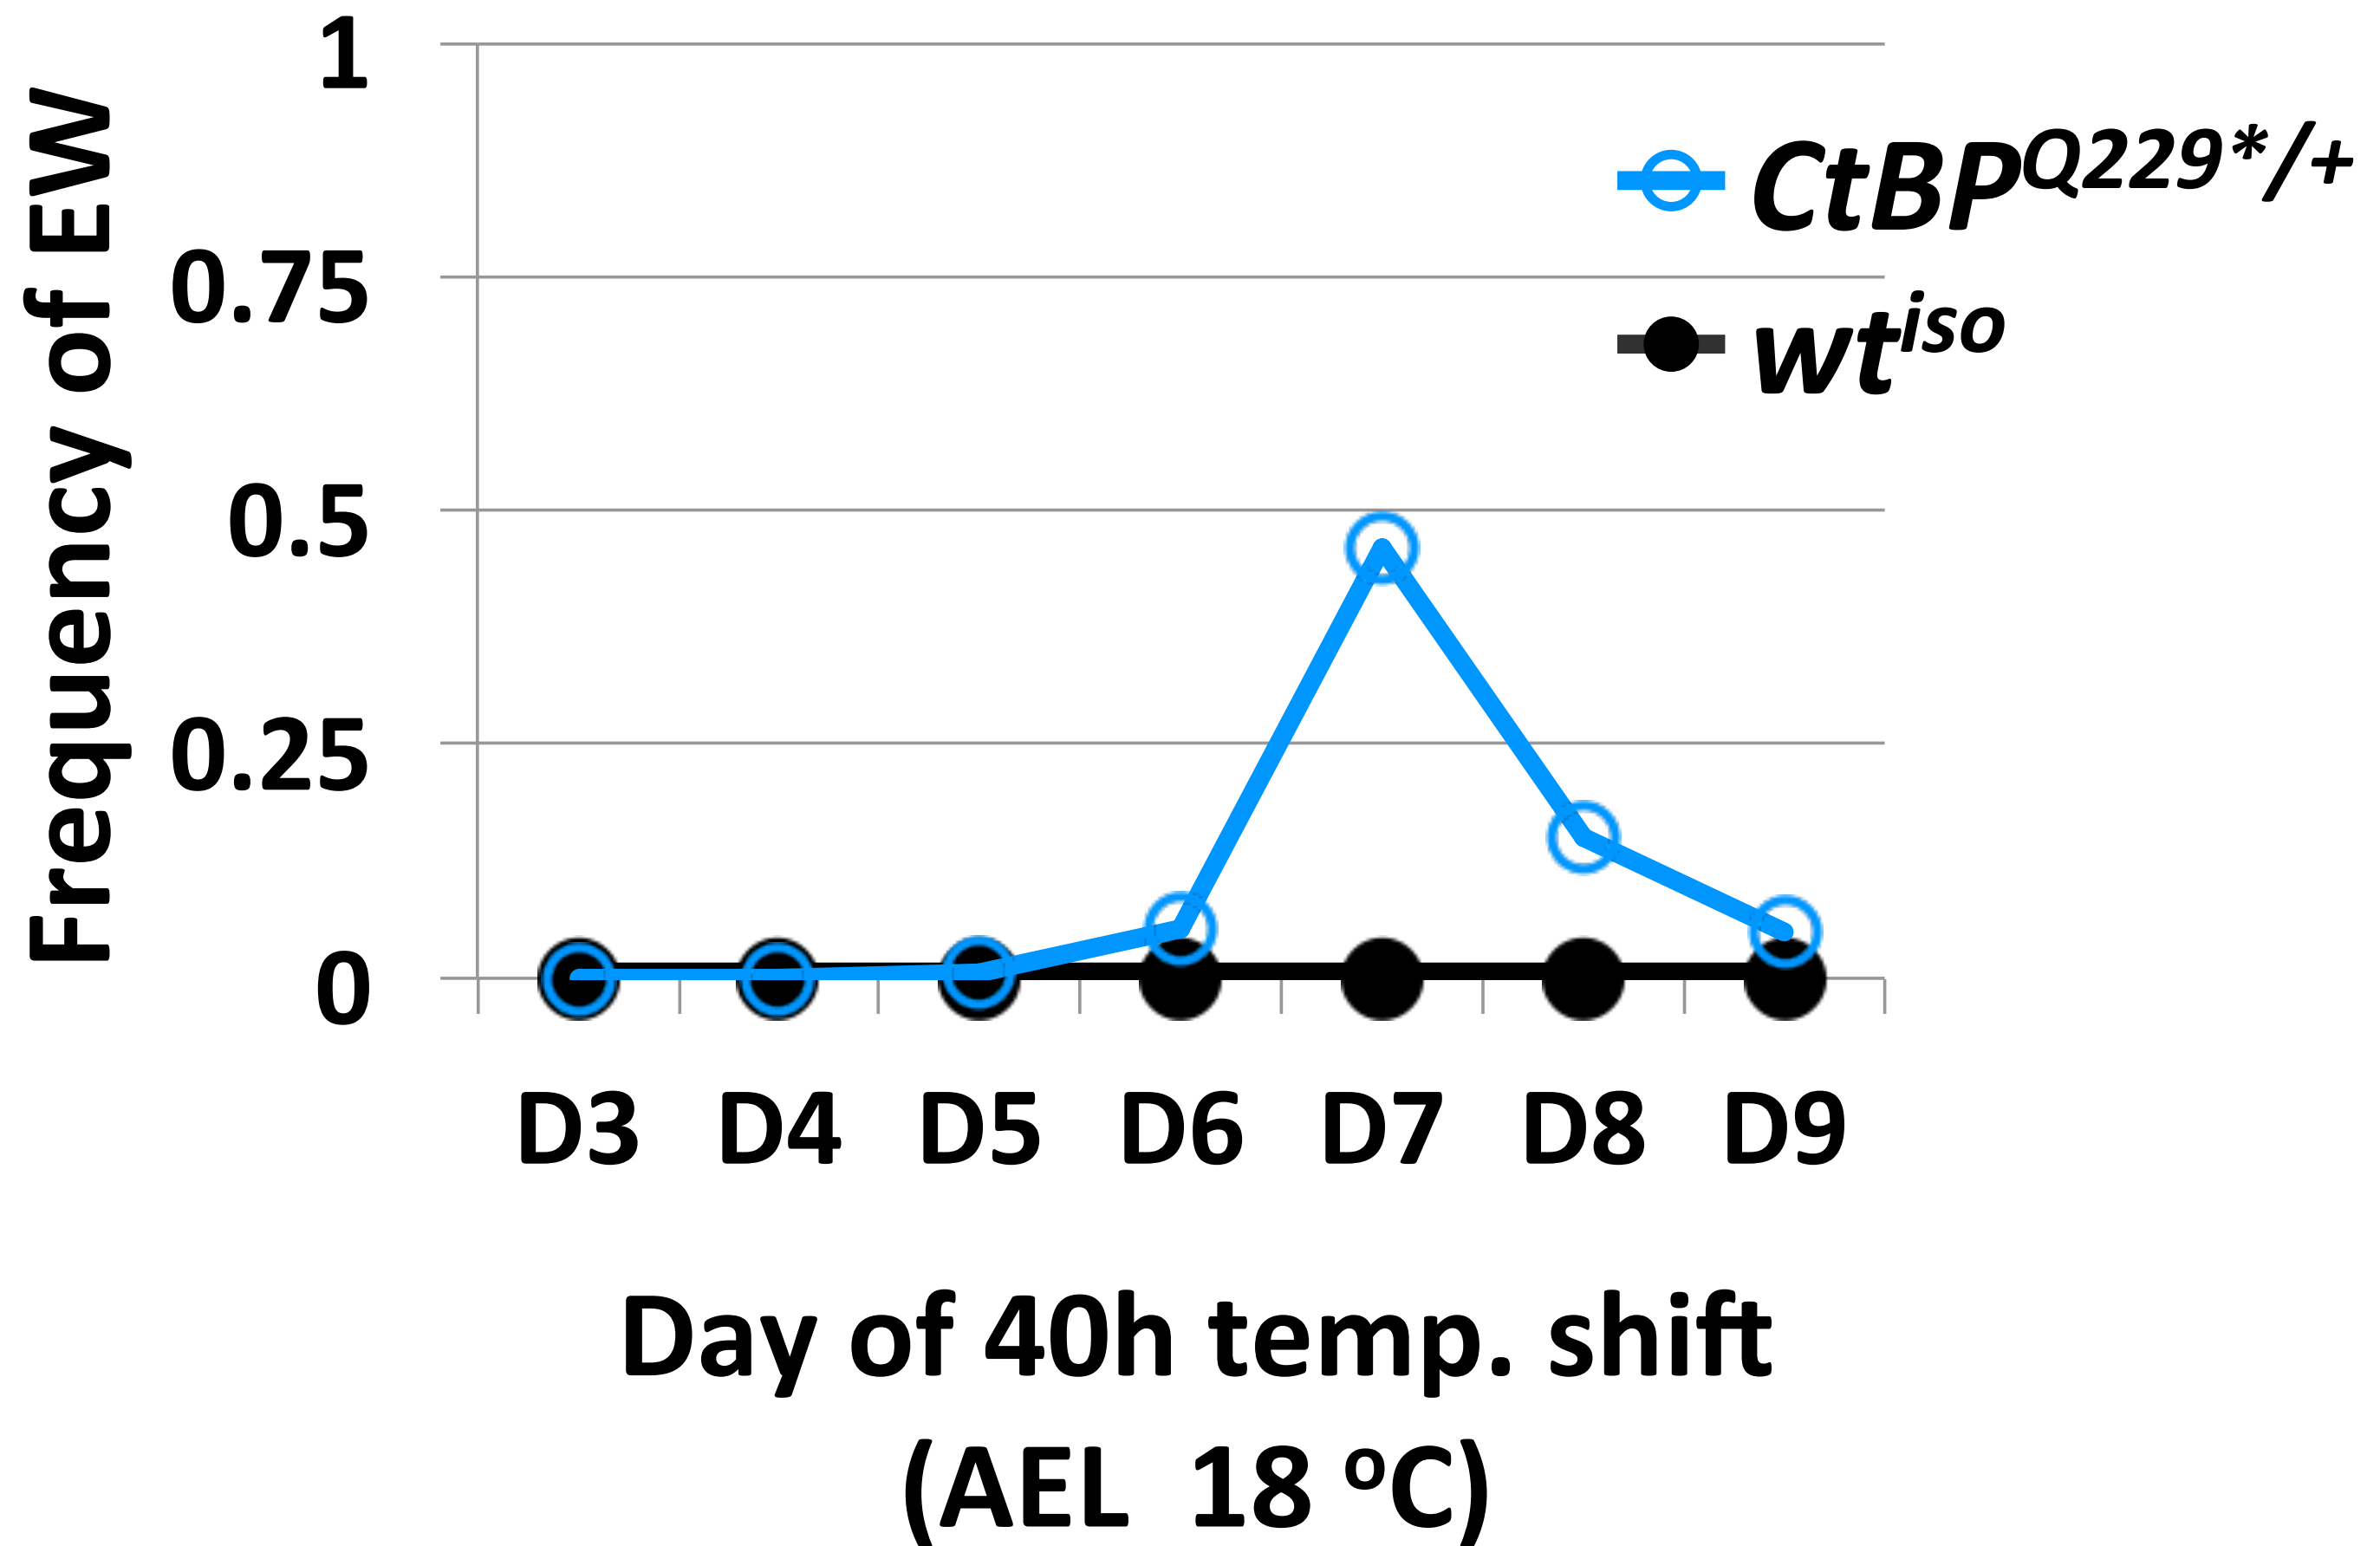

Supplement: supp [file elife-30391-supp-v1.zip]

***dilp8<sup>M100727</sup>, CtBP<sup>Q229\*</sup>/+***

**A**

Observed

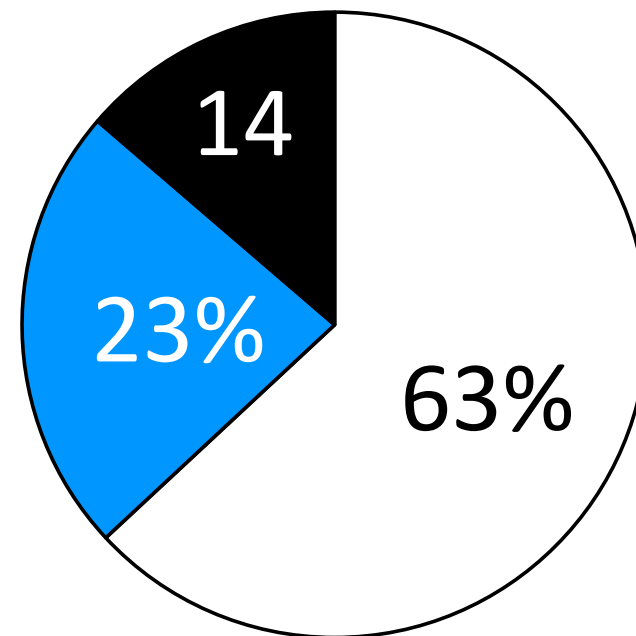

Per Adult:

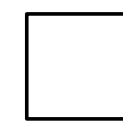

No EW

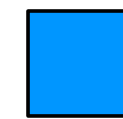

One EW

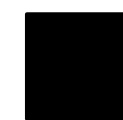

Two EW

**B**

Expected  
(25% heminota)

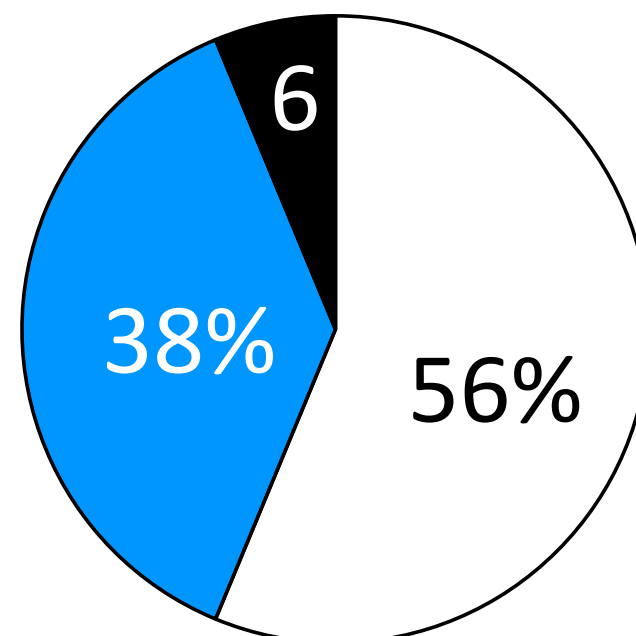

Supplement: supp [file elife-30391-supp-v1.zip]

*rn<sup>ts</sup>>egr*

*rn<sup>ts</sup>>egr, >Fos<sup>DN</sup>*

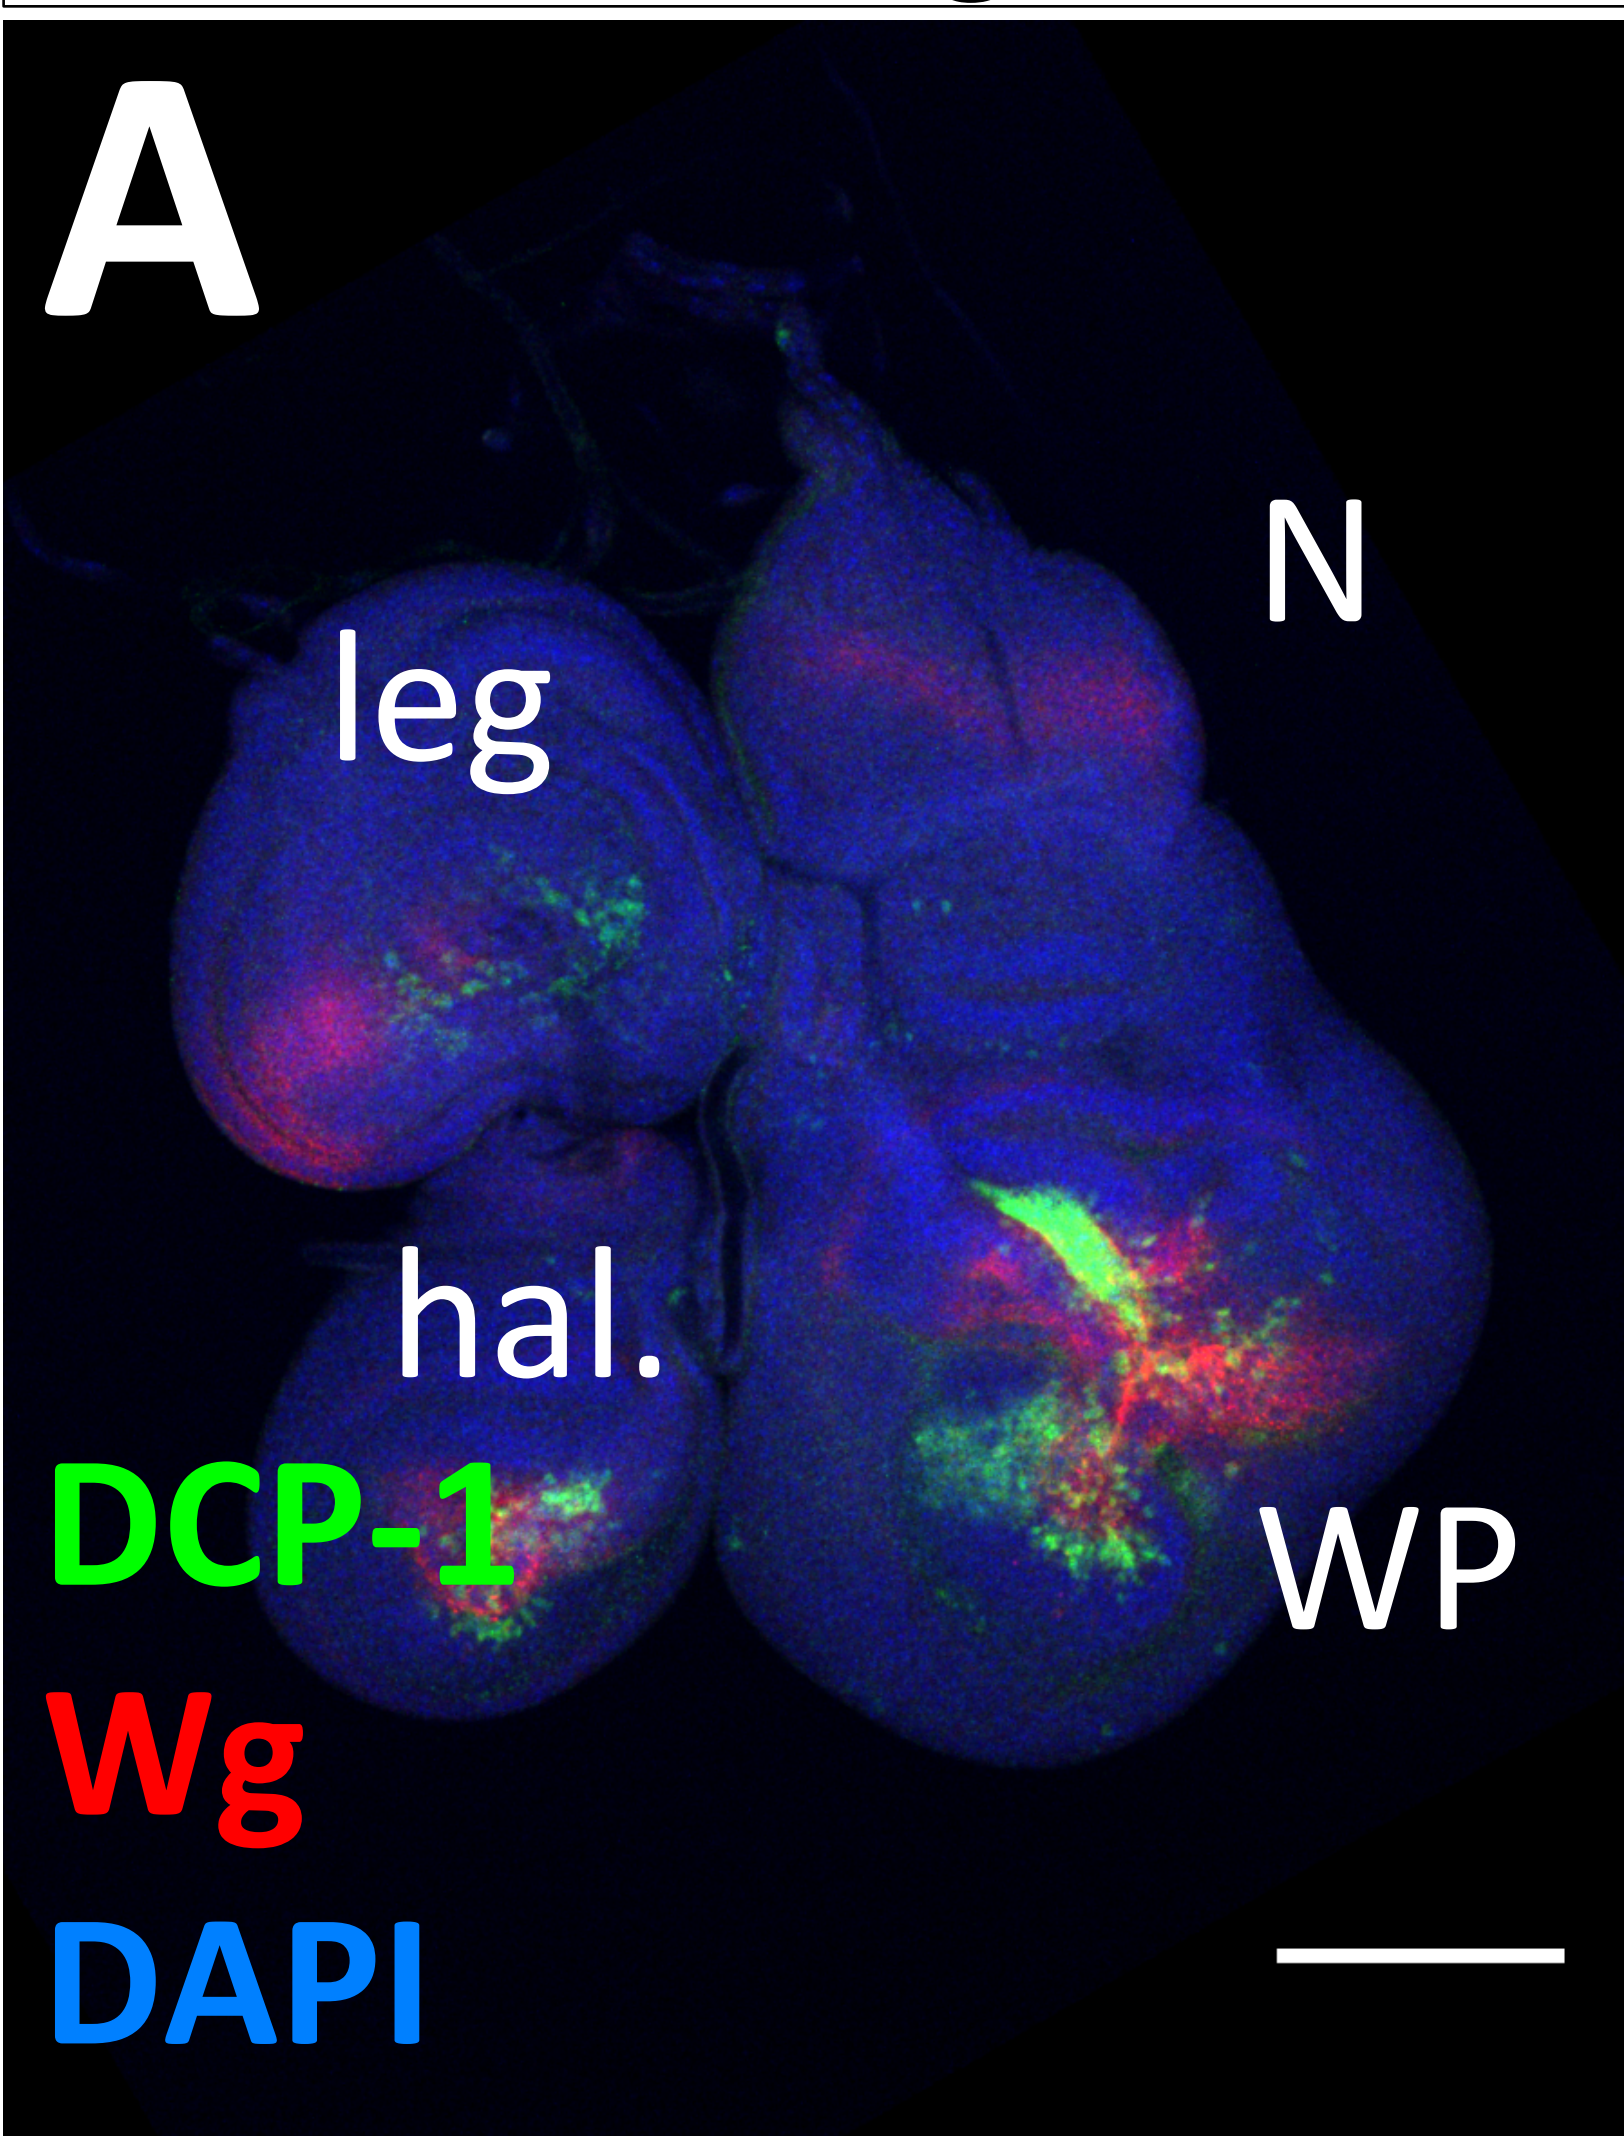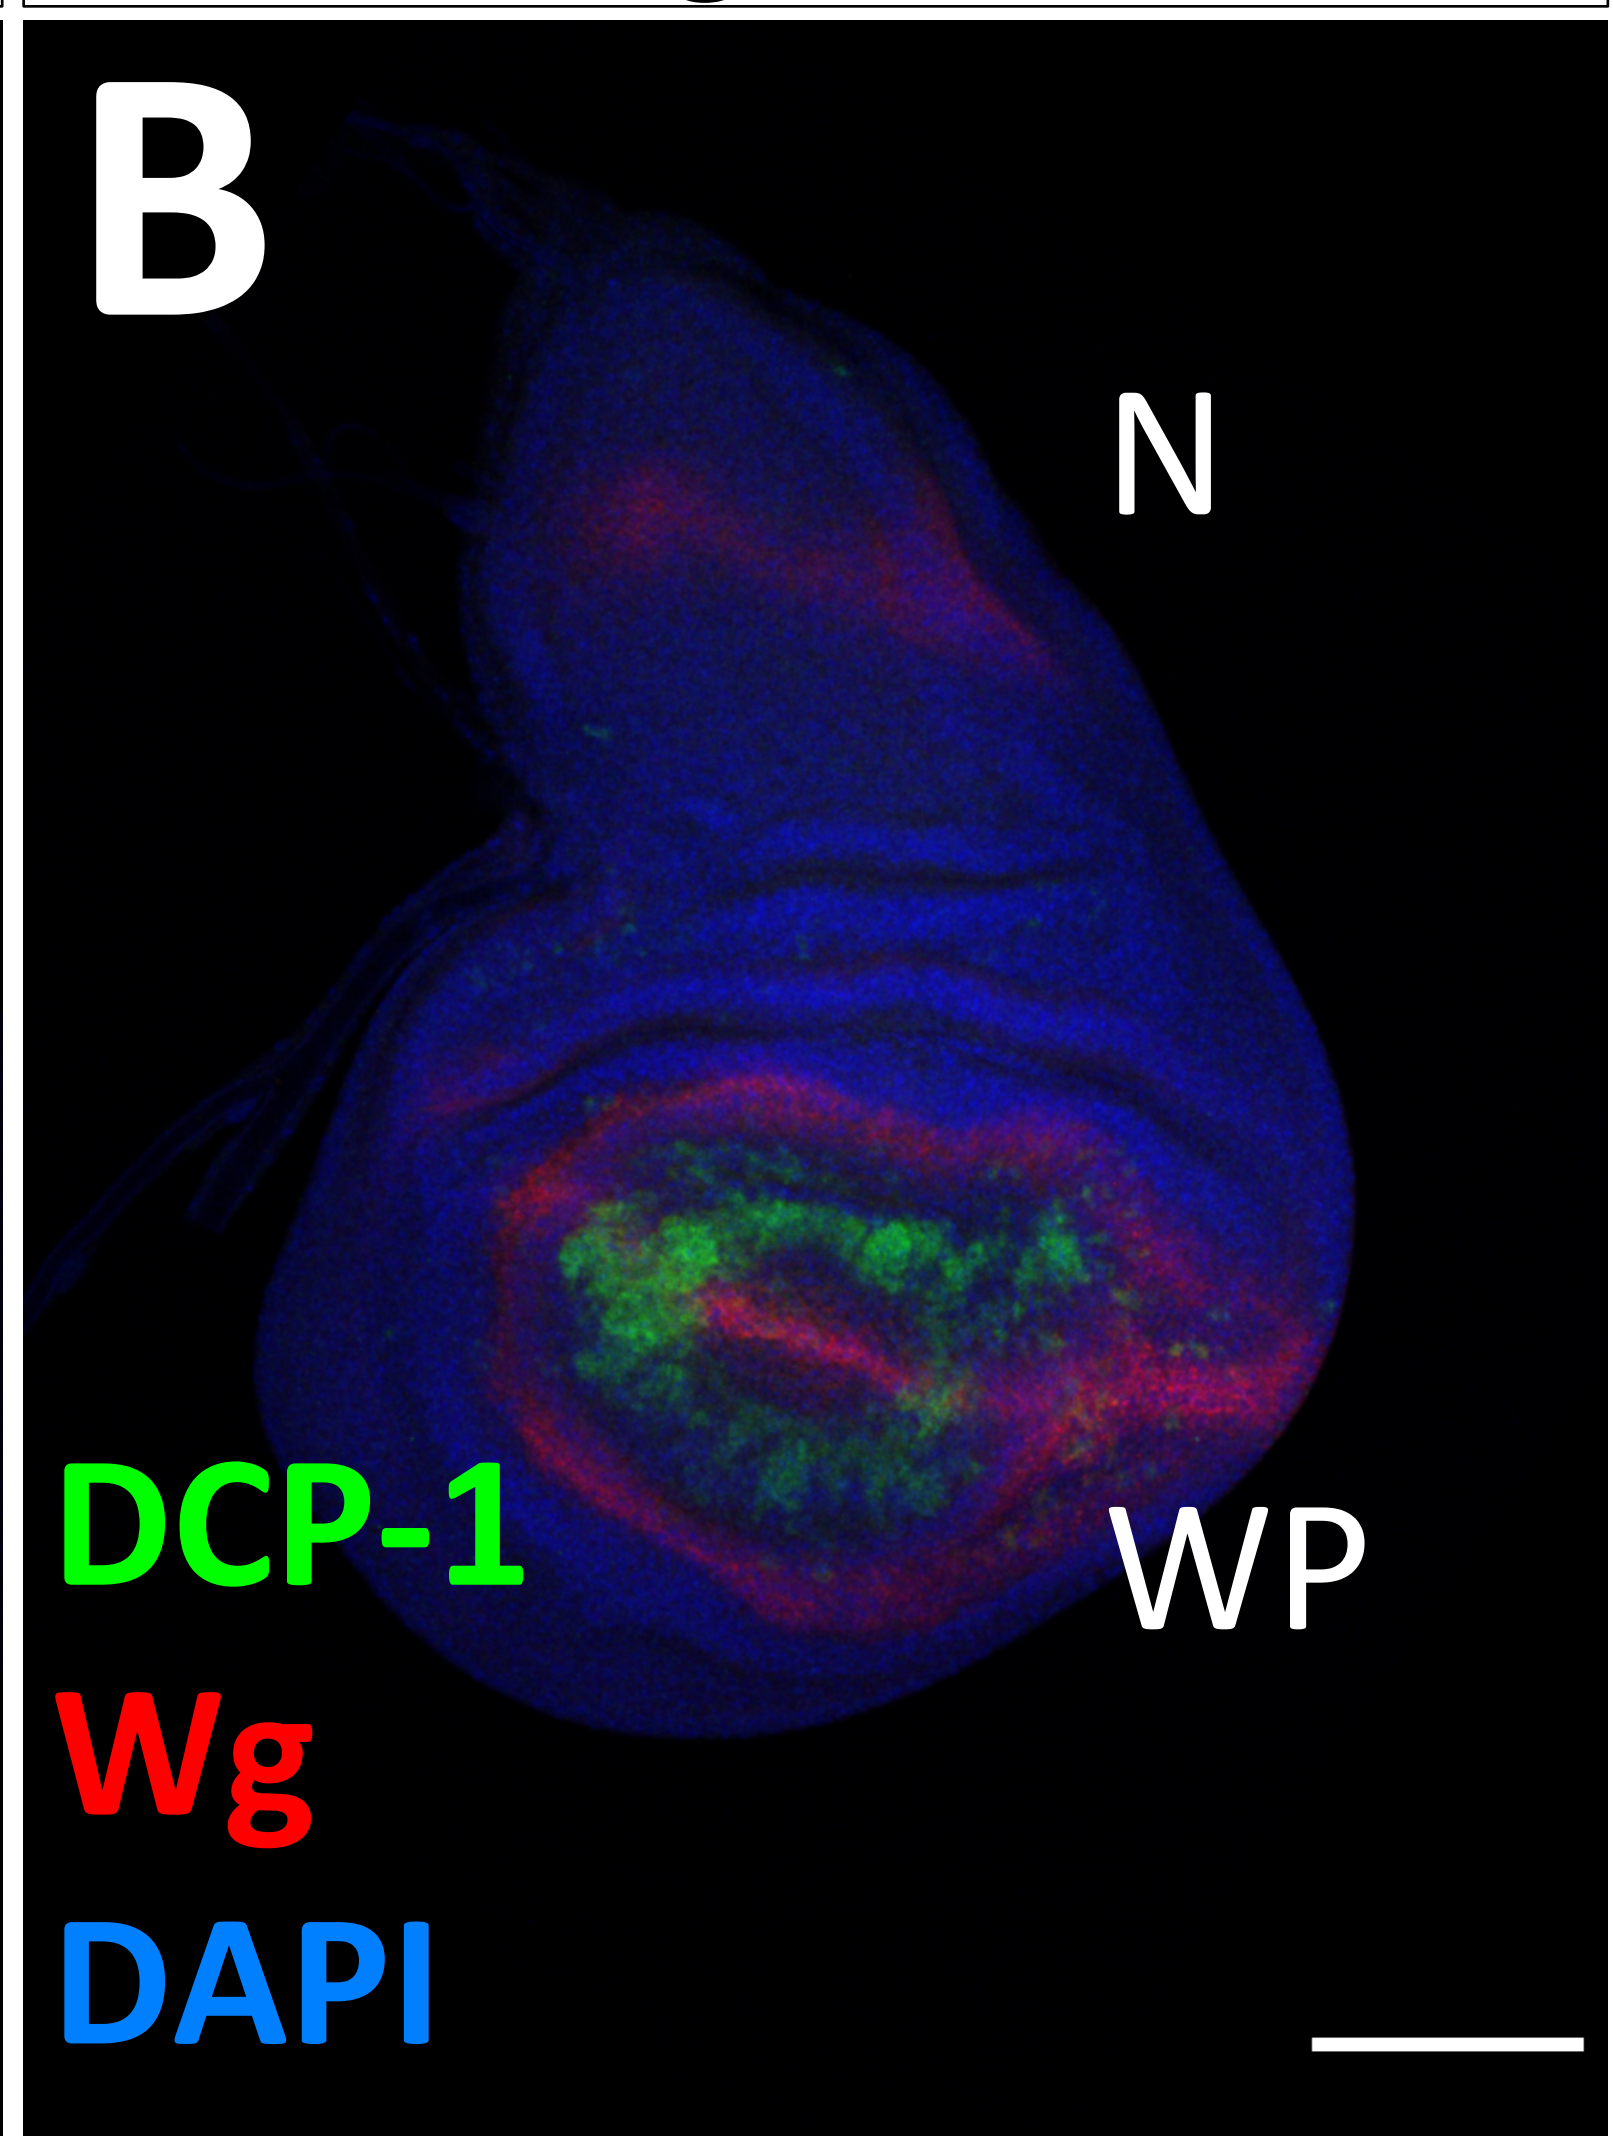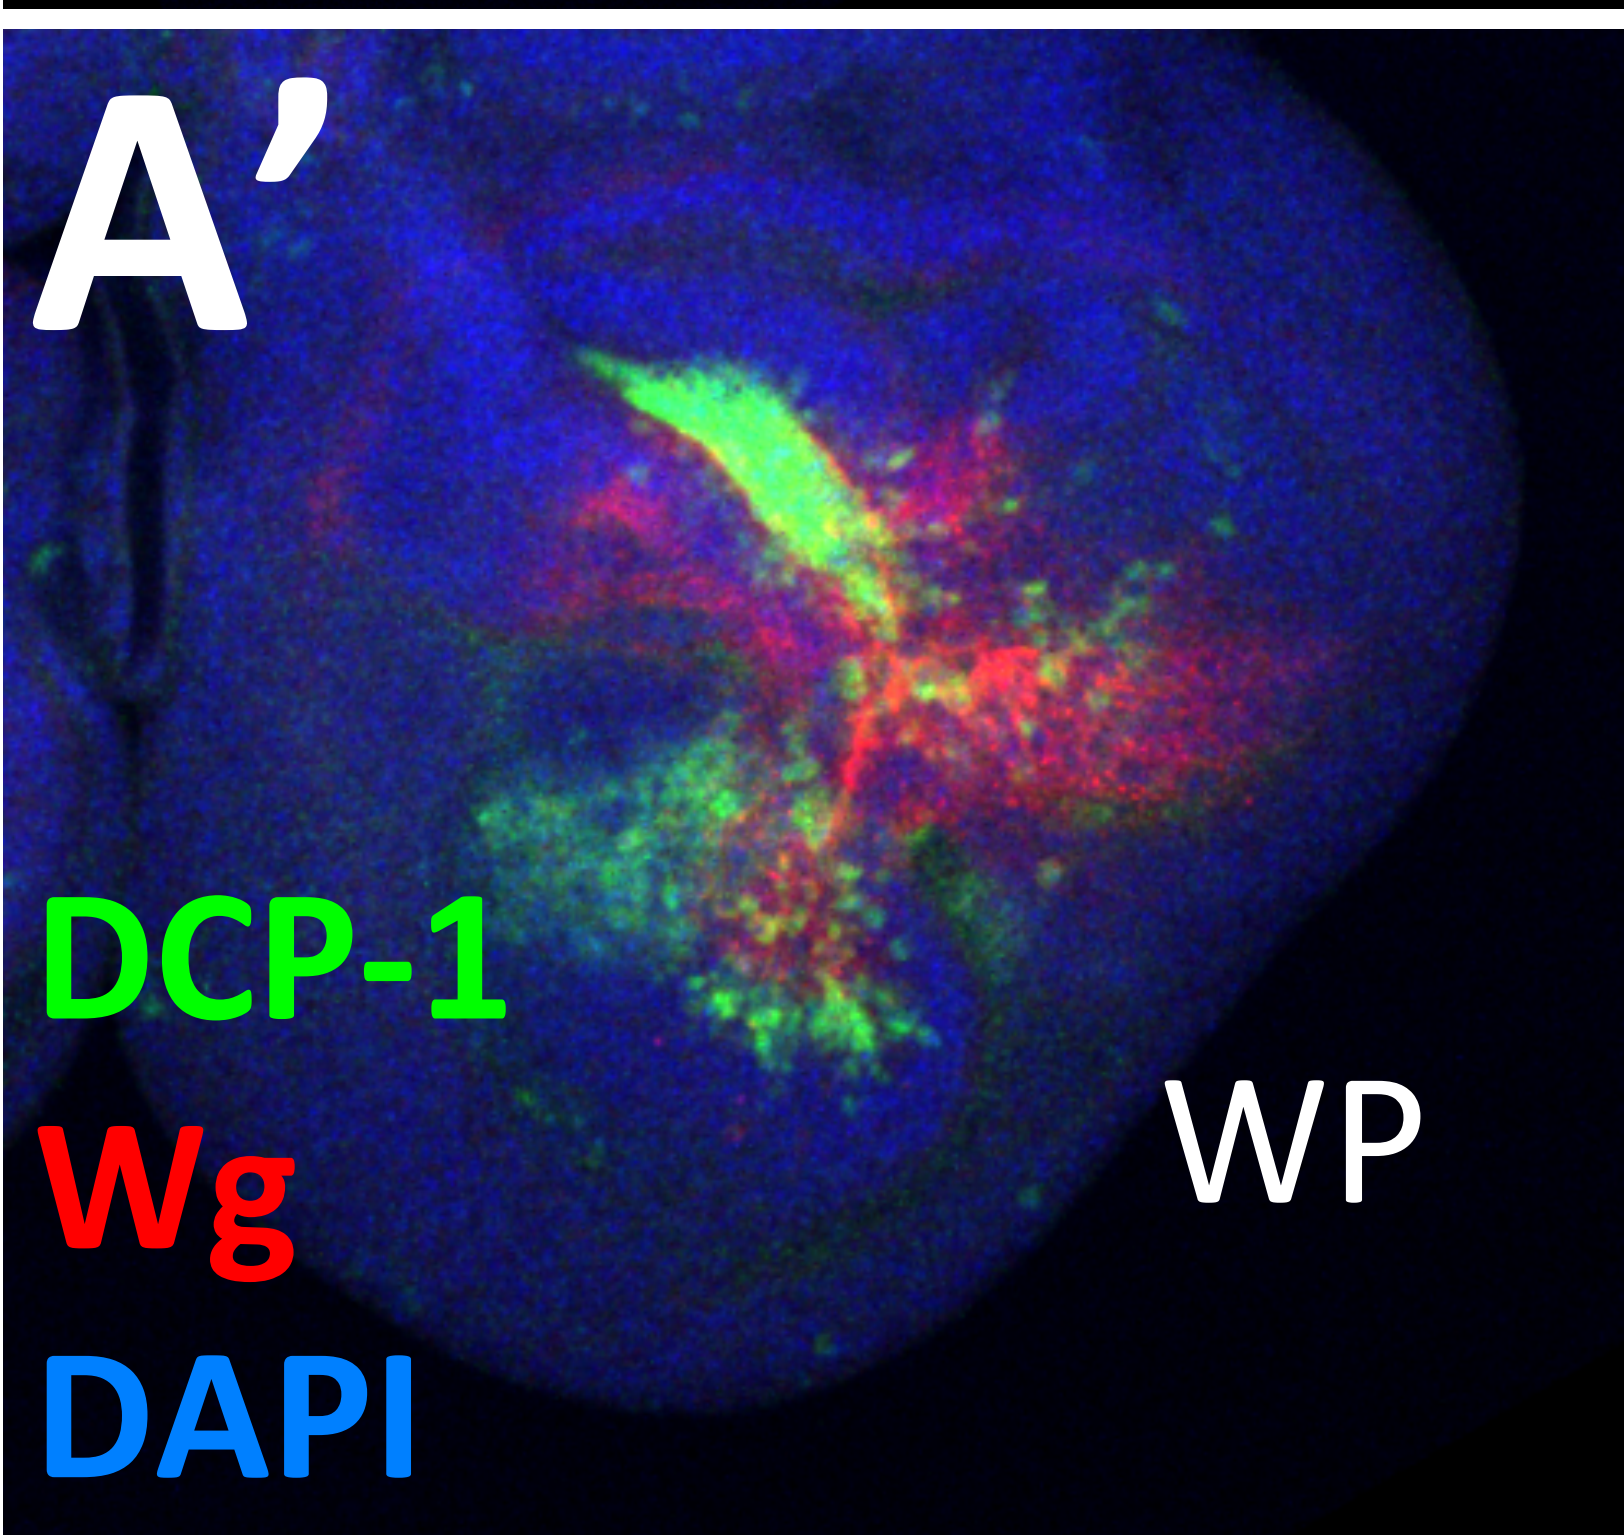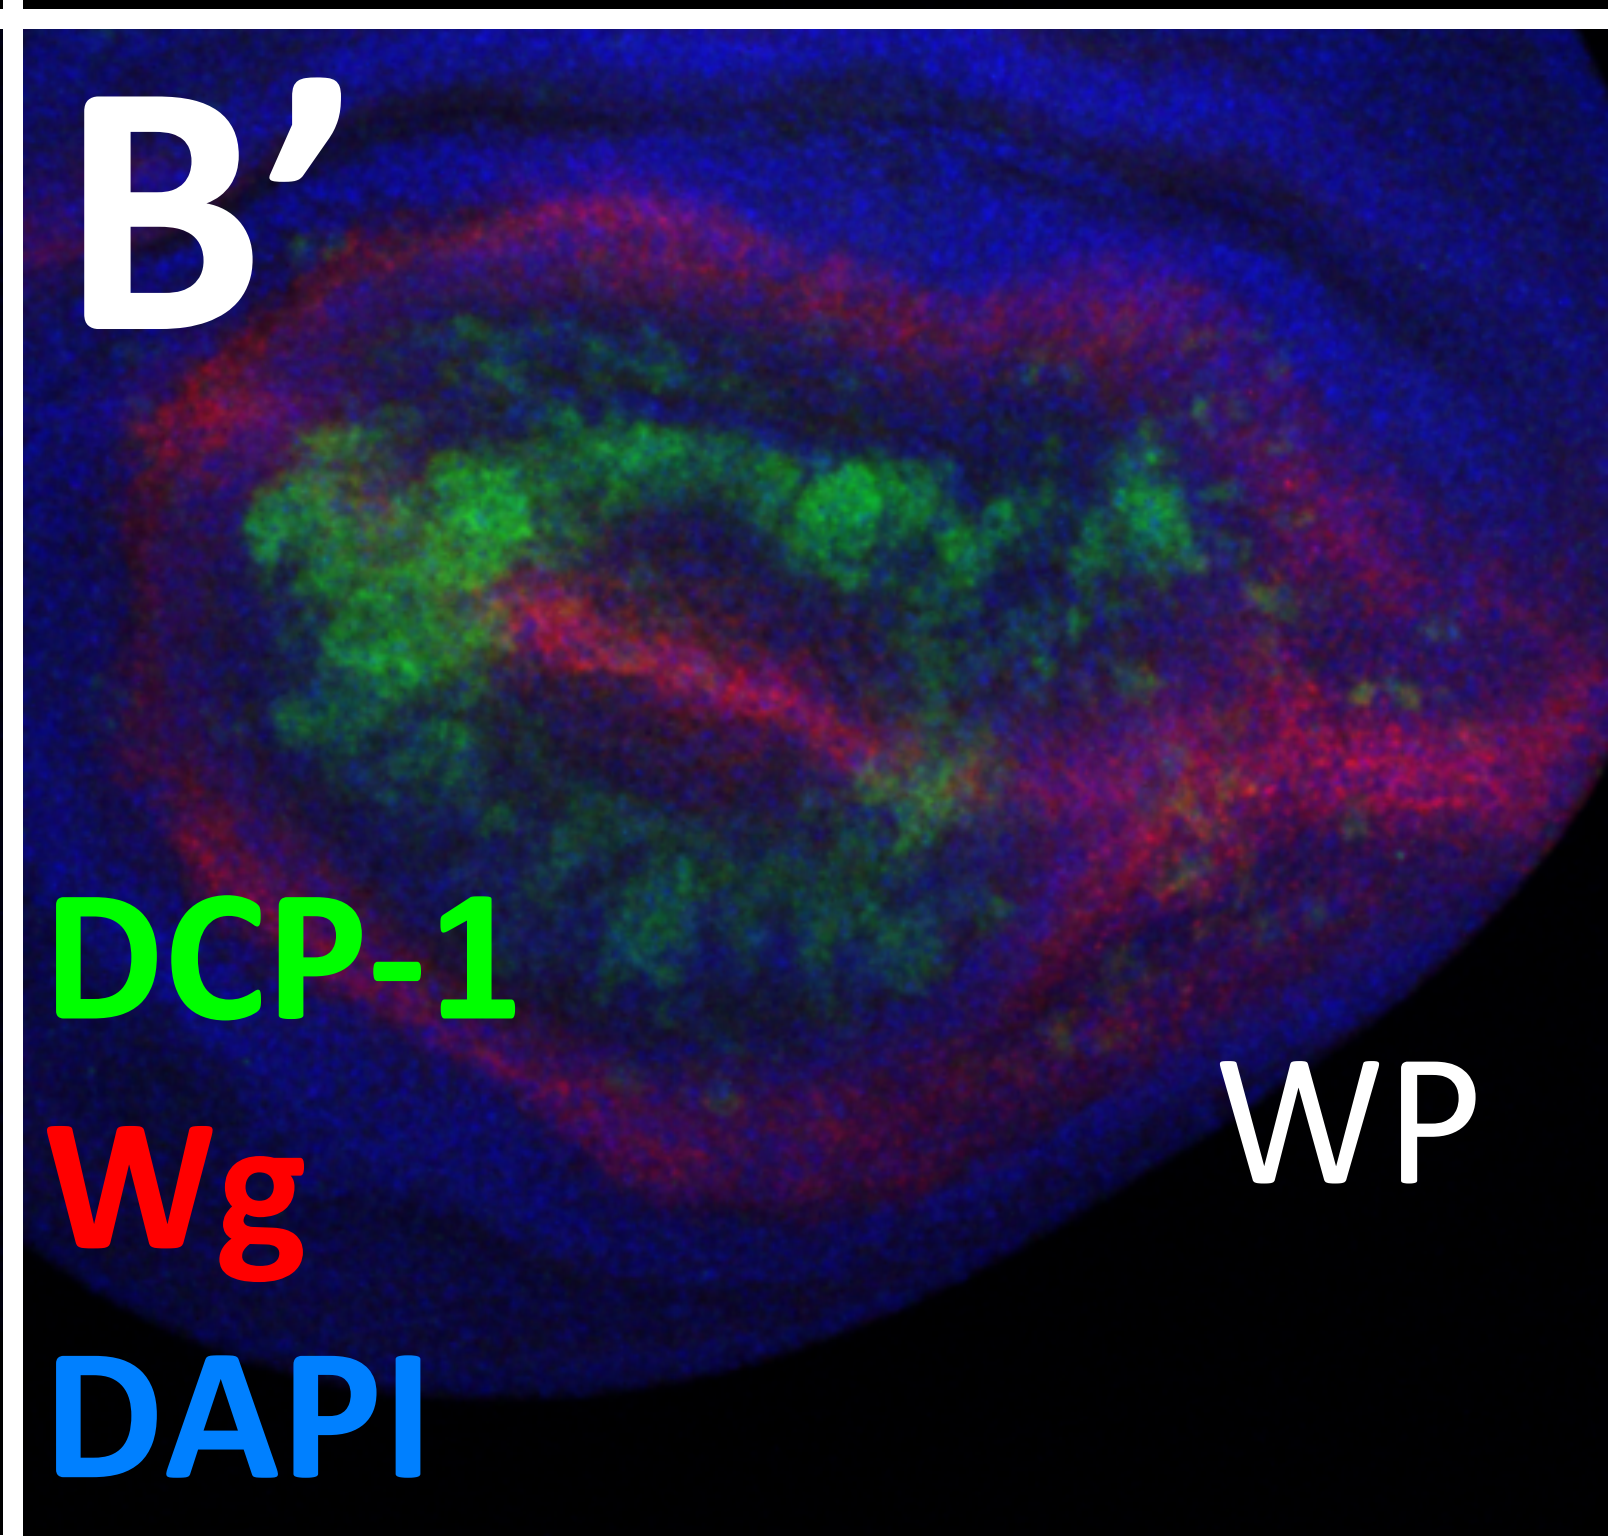

Supplement: supp [file elife-30391-supp-v1.zip]

*hs-FLP; STAT-DGFP; FRT82B RFP / FRT82B CtBP<sup>Q229\*</sup>*

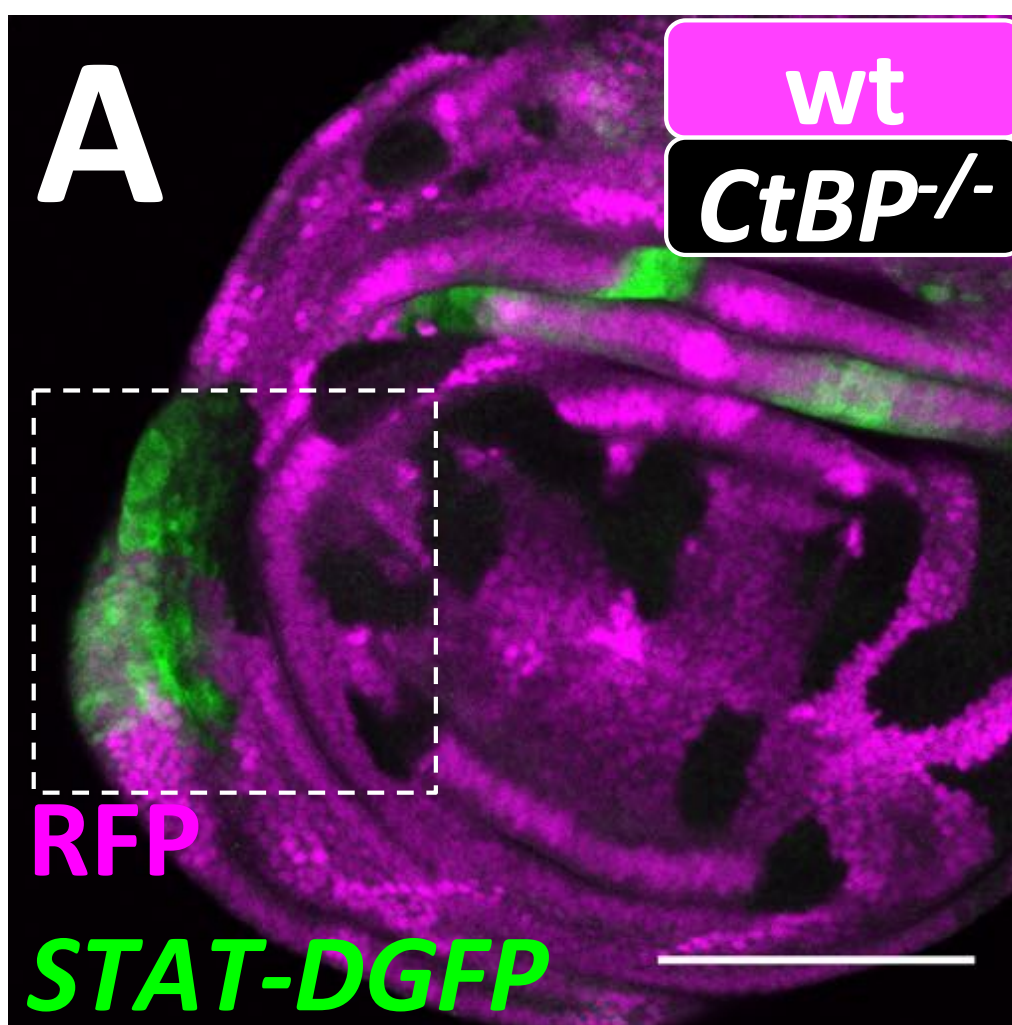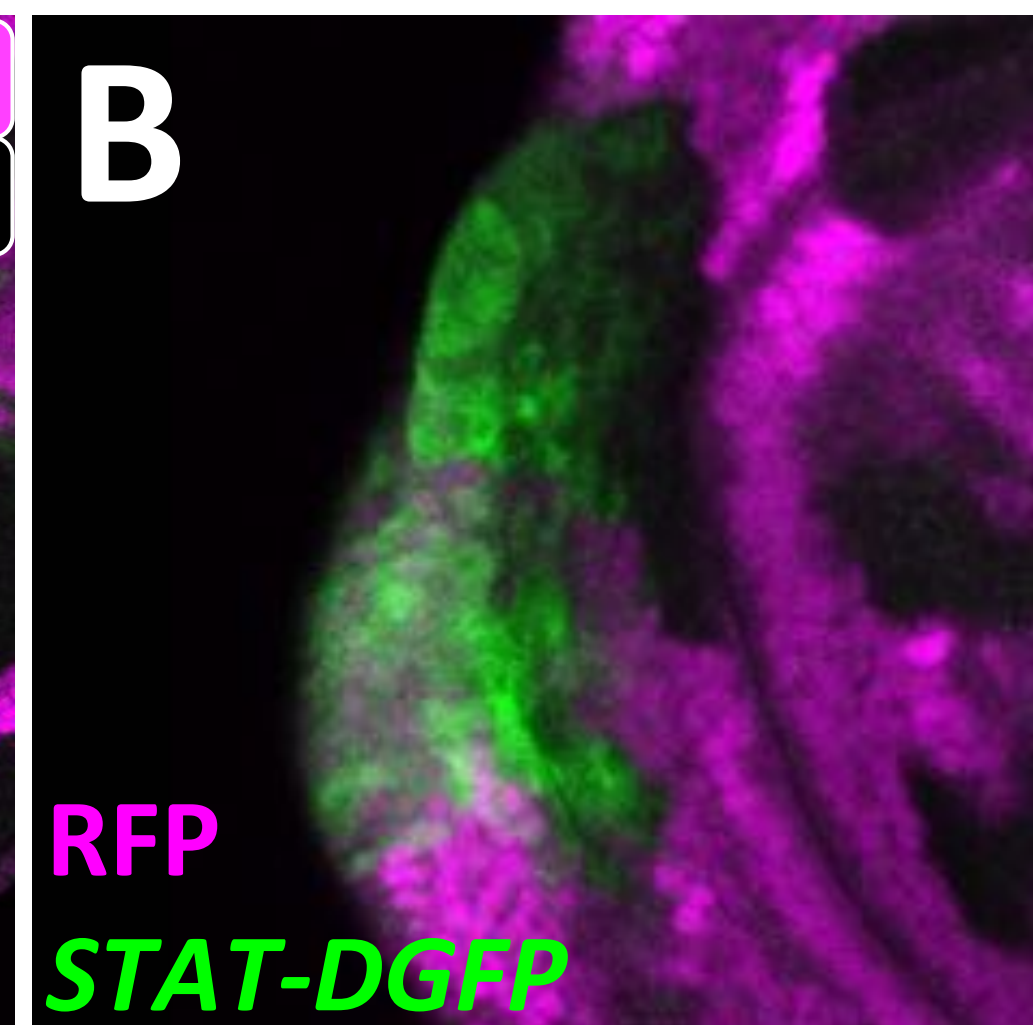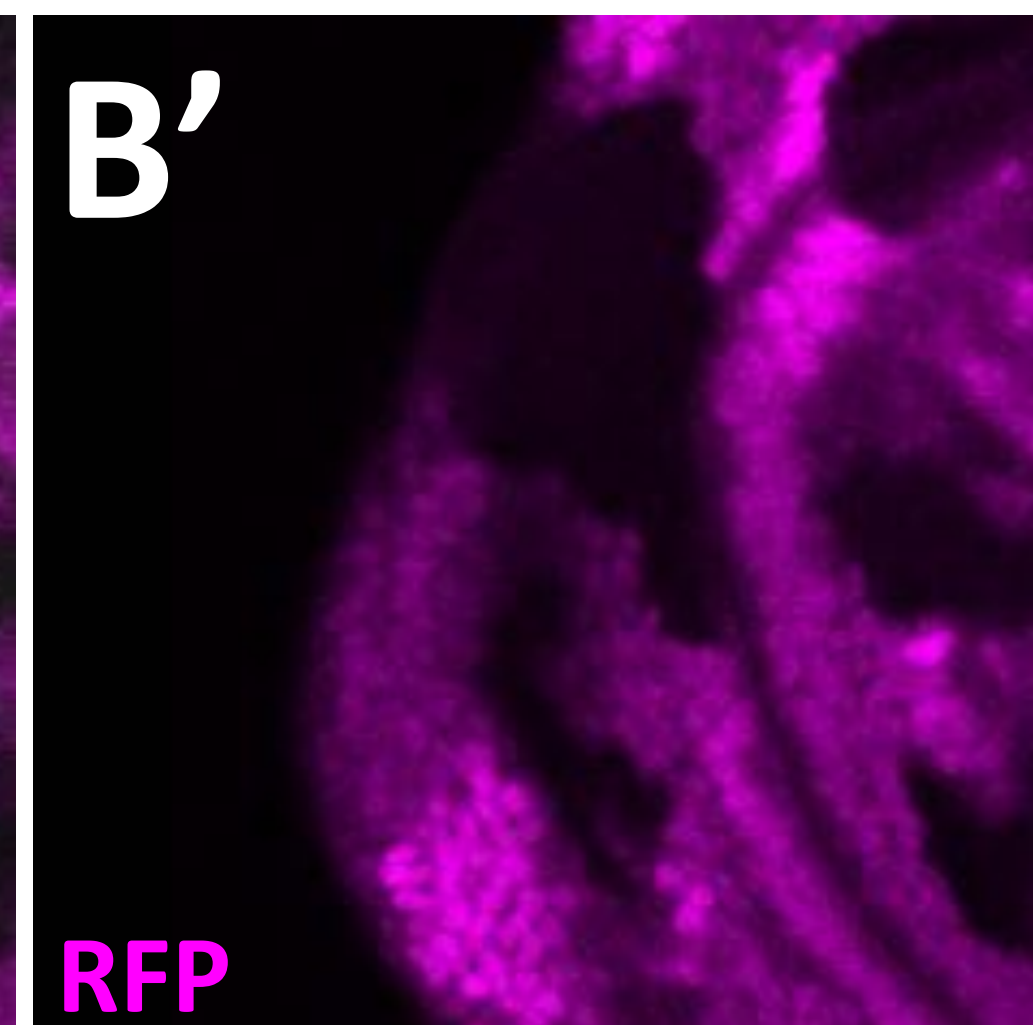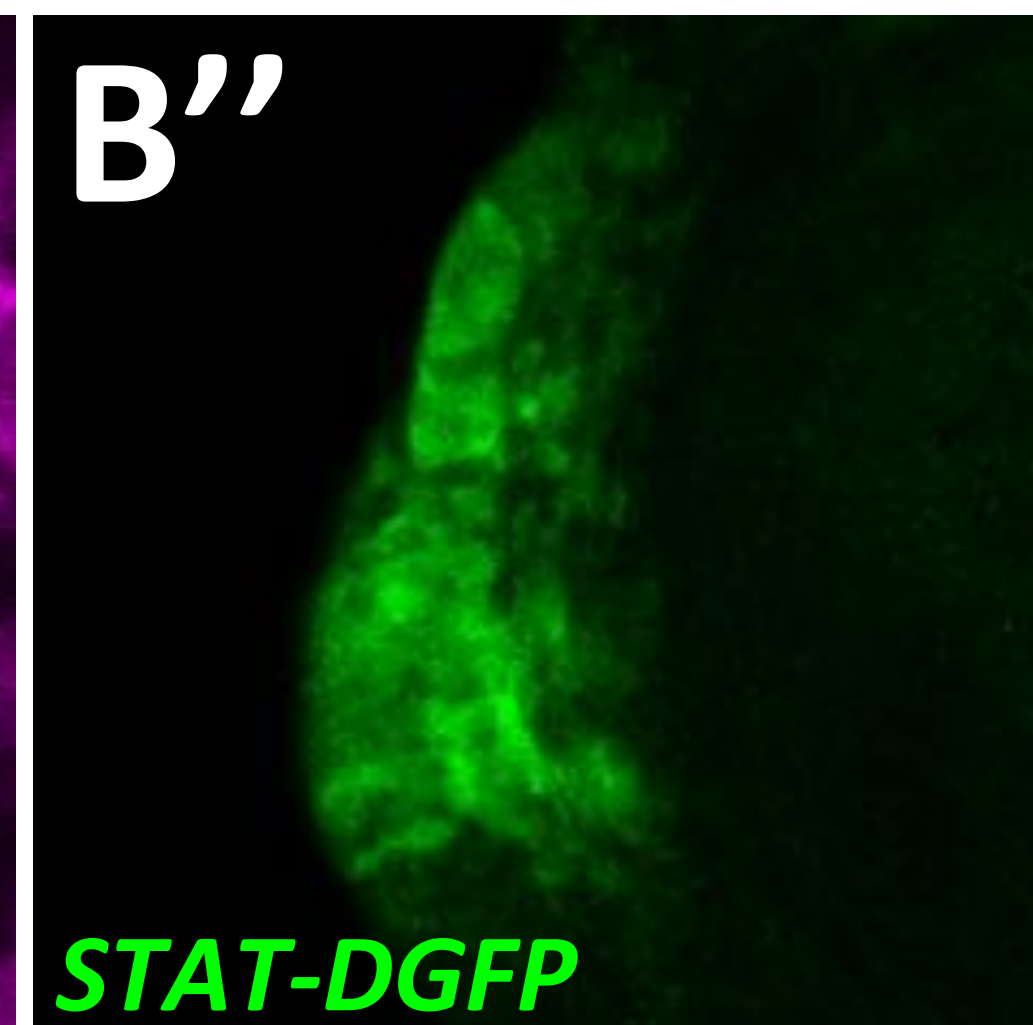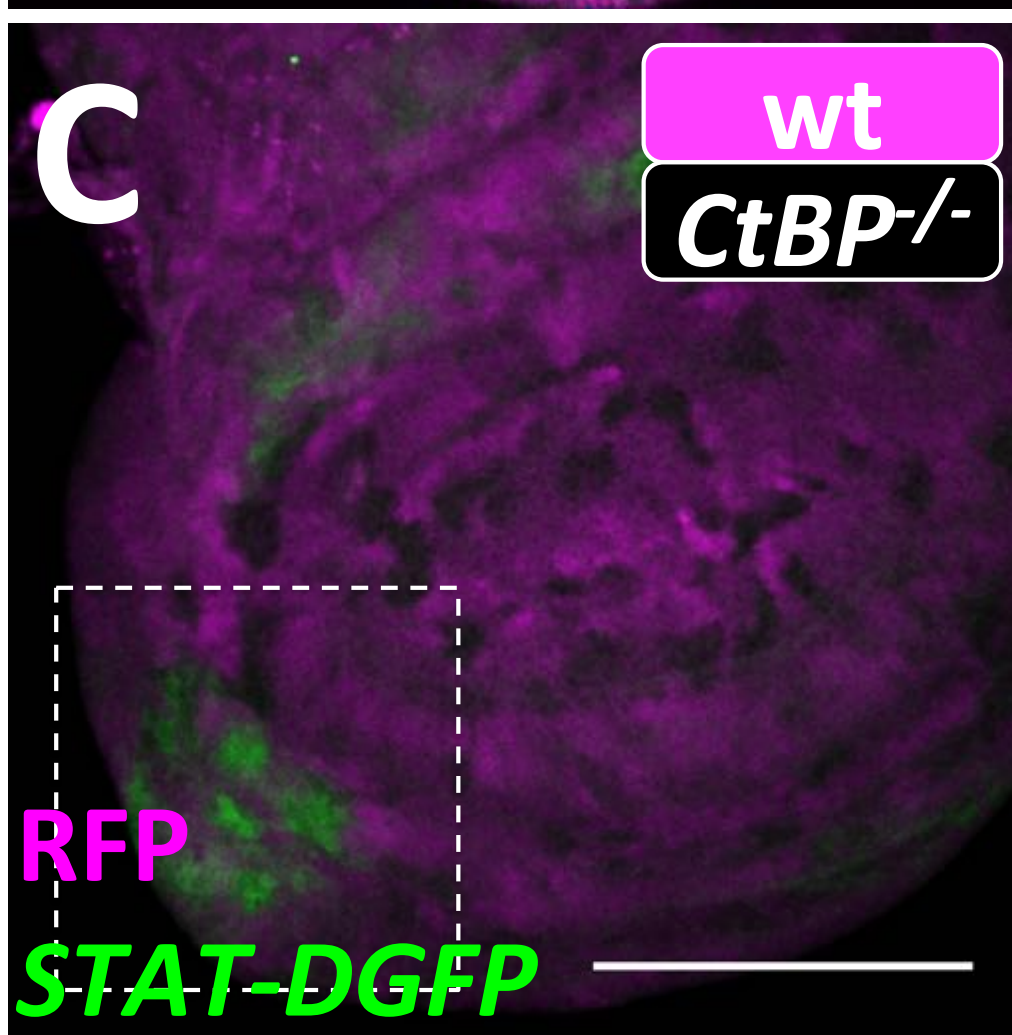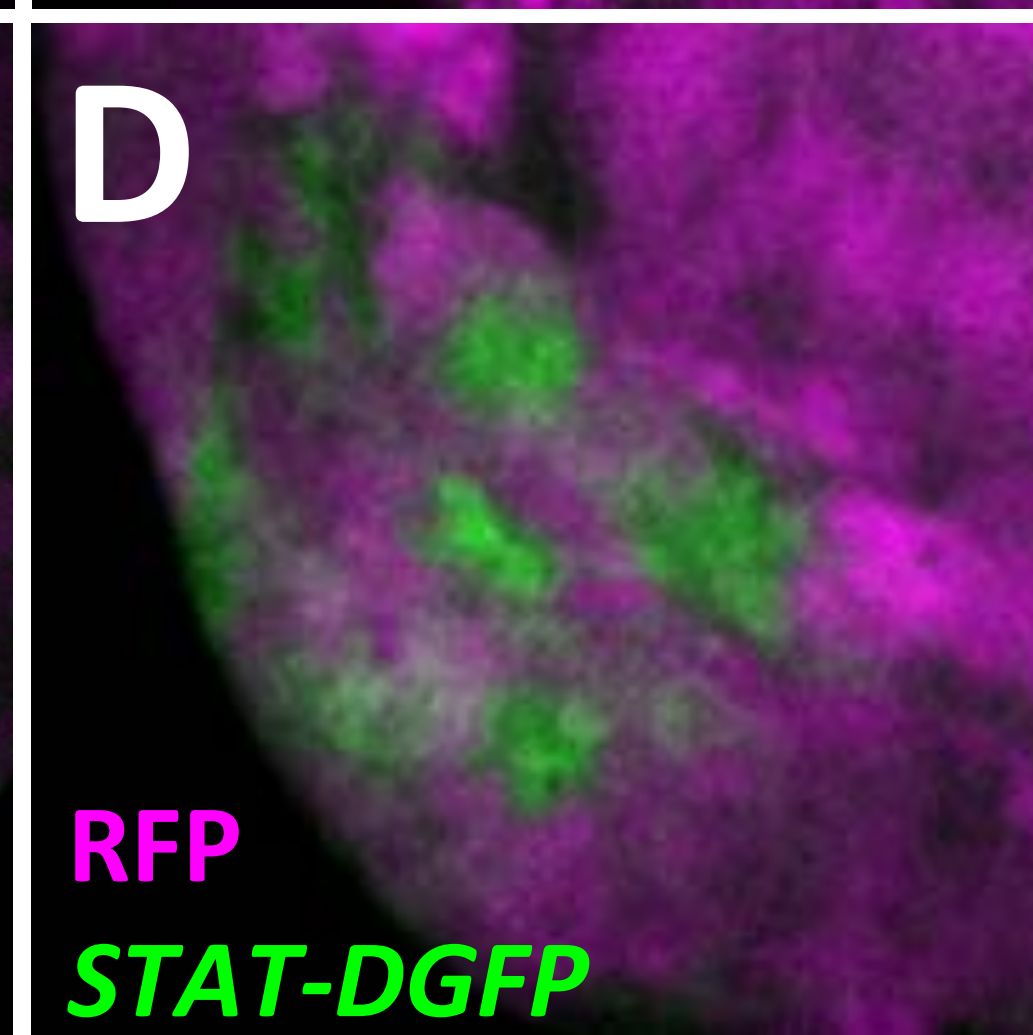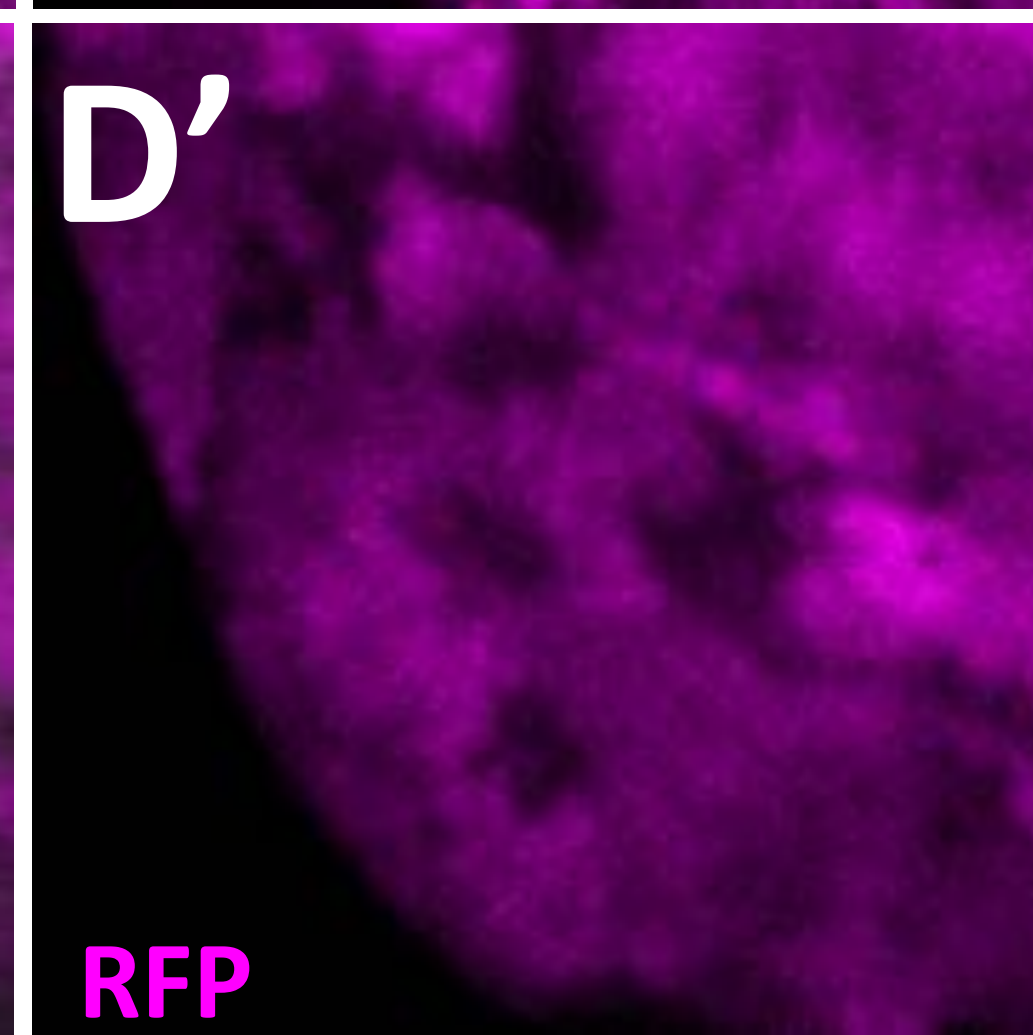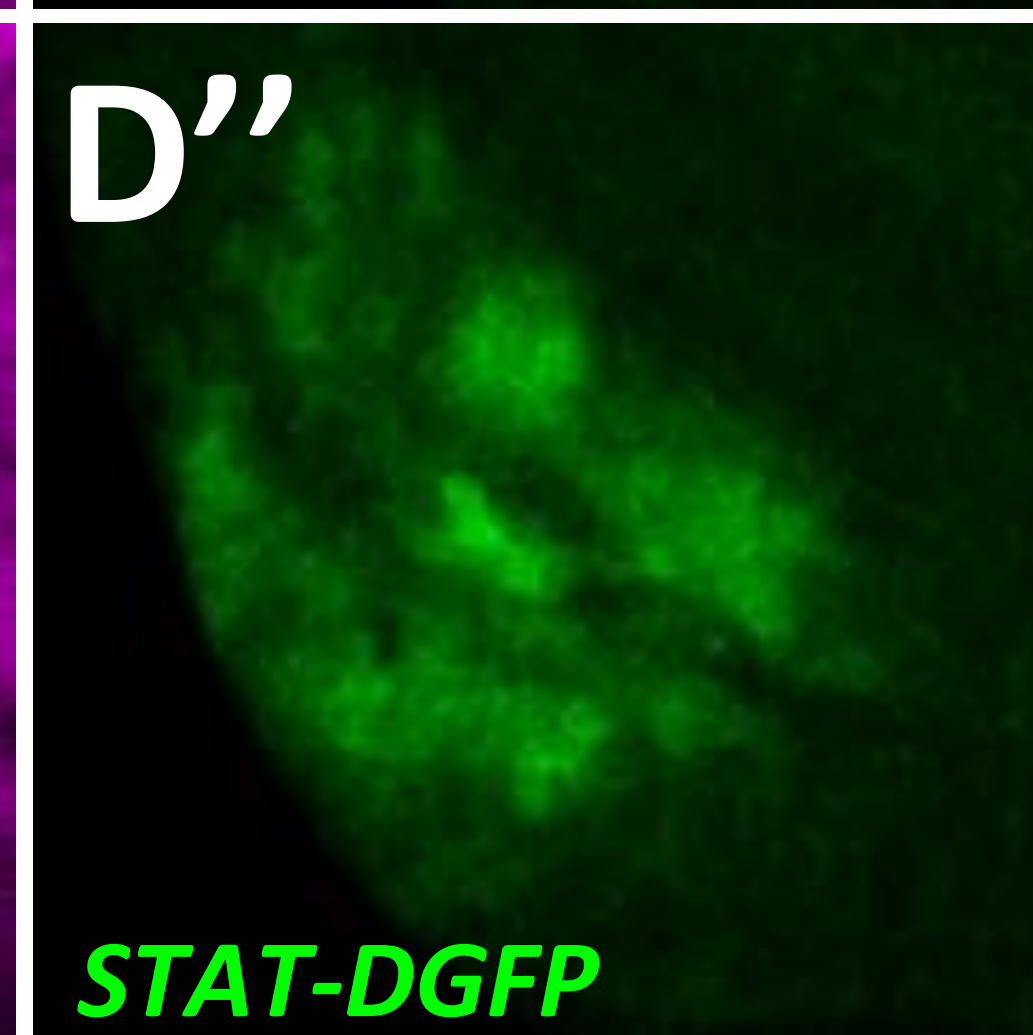

Supplement: supp [file elife-30391-supp-v1.zip]

**D7 24 h**

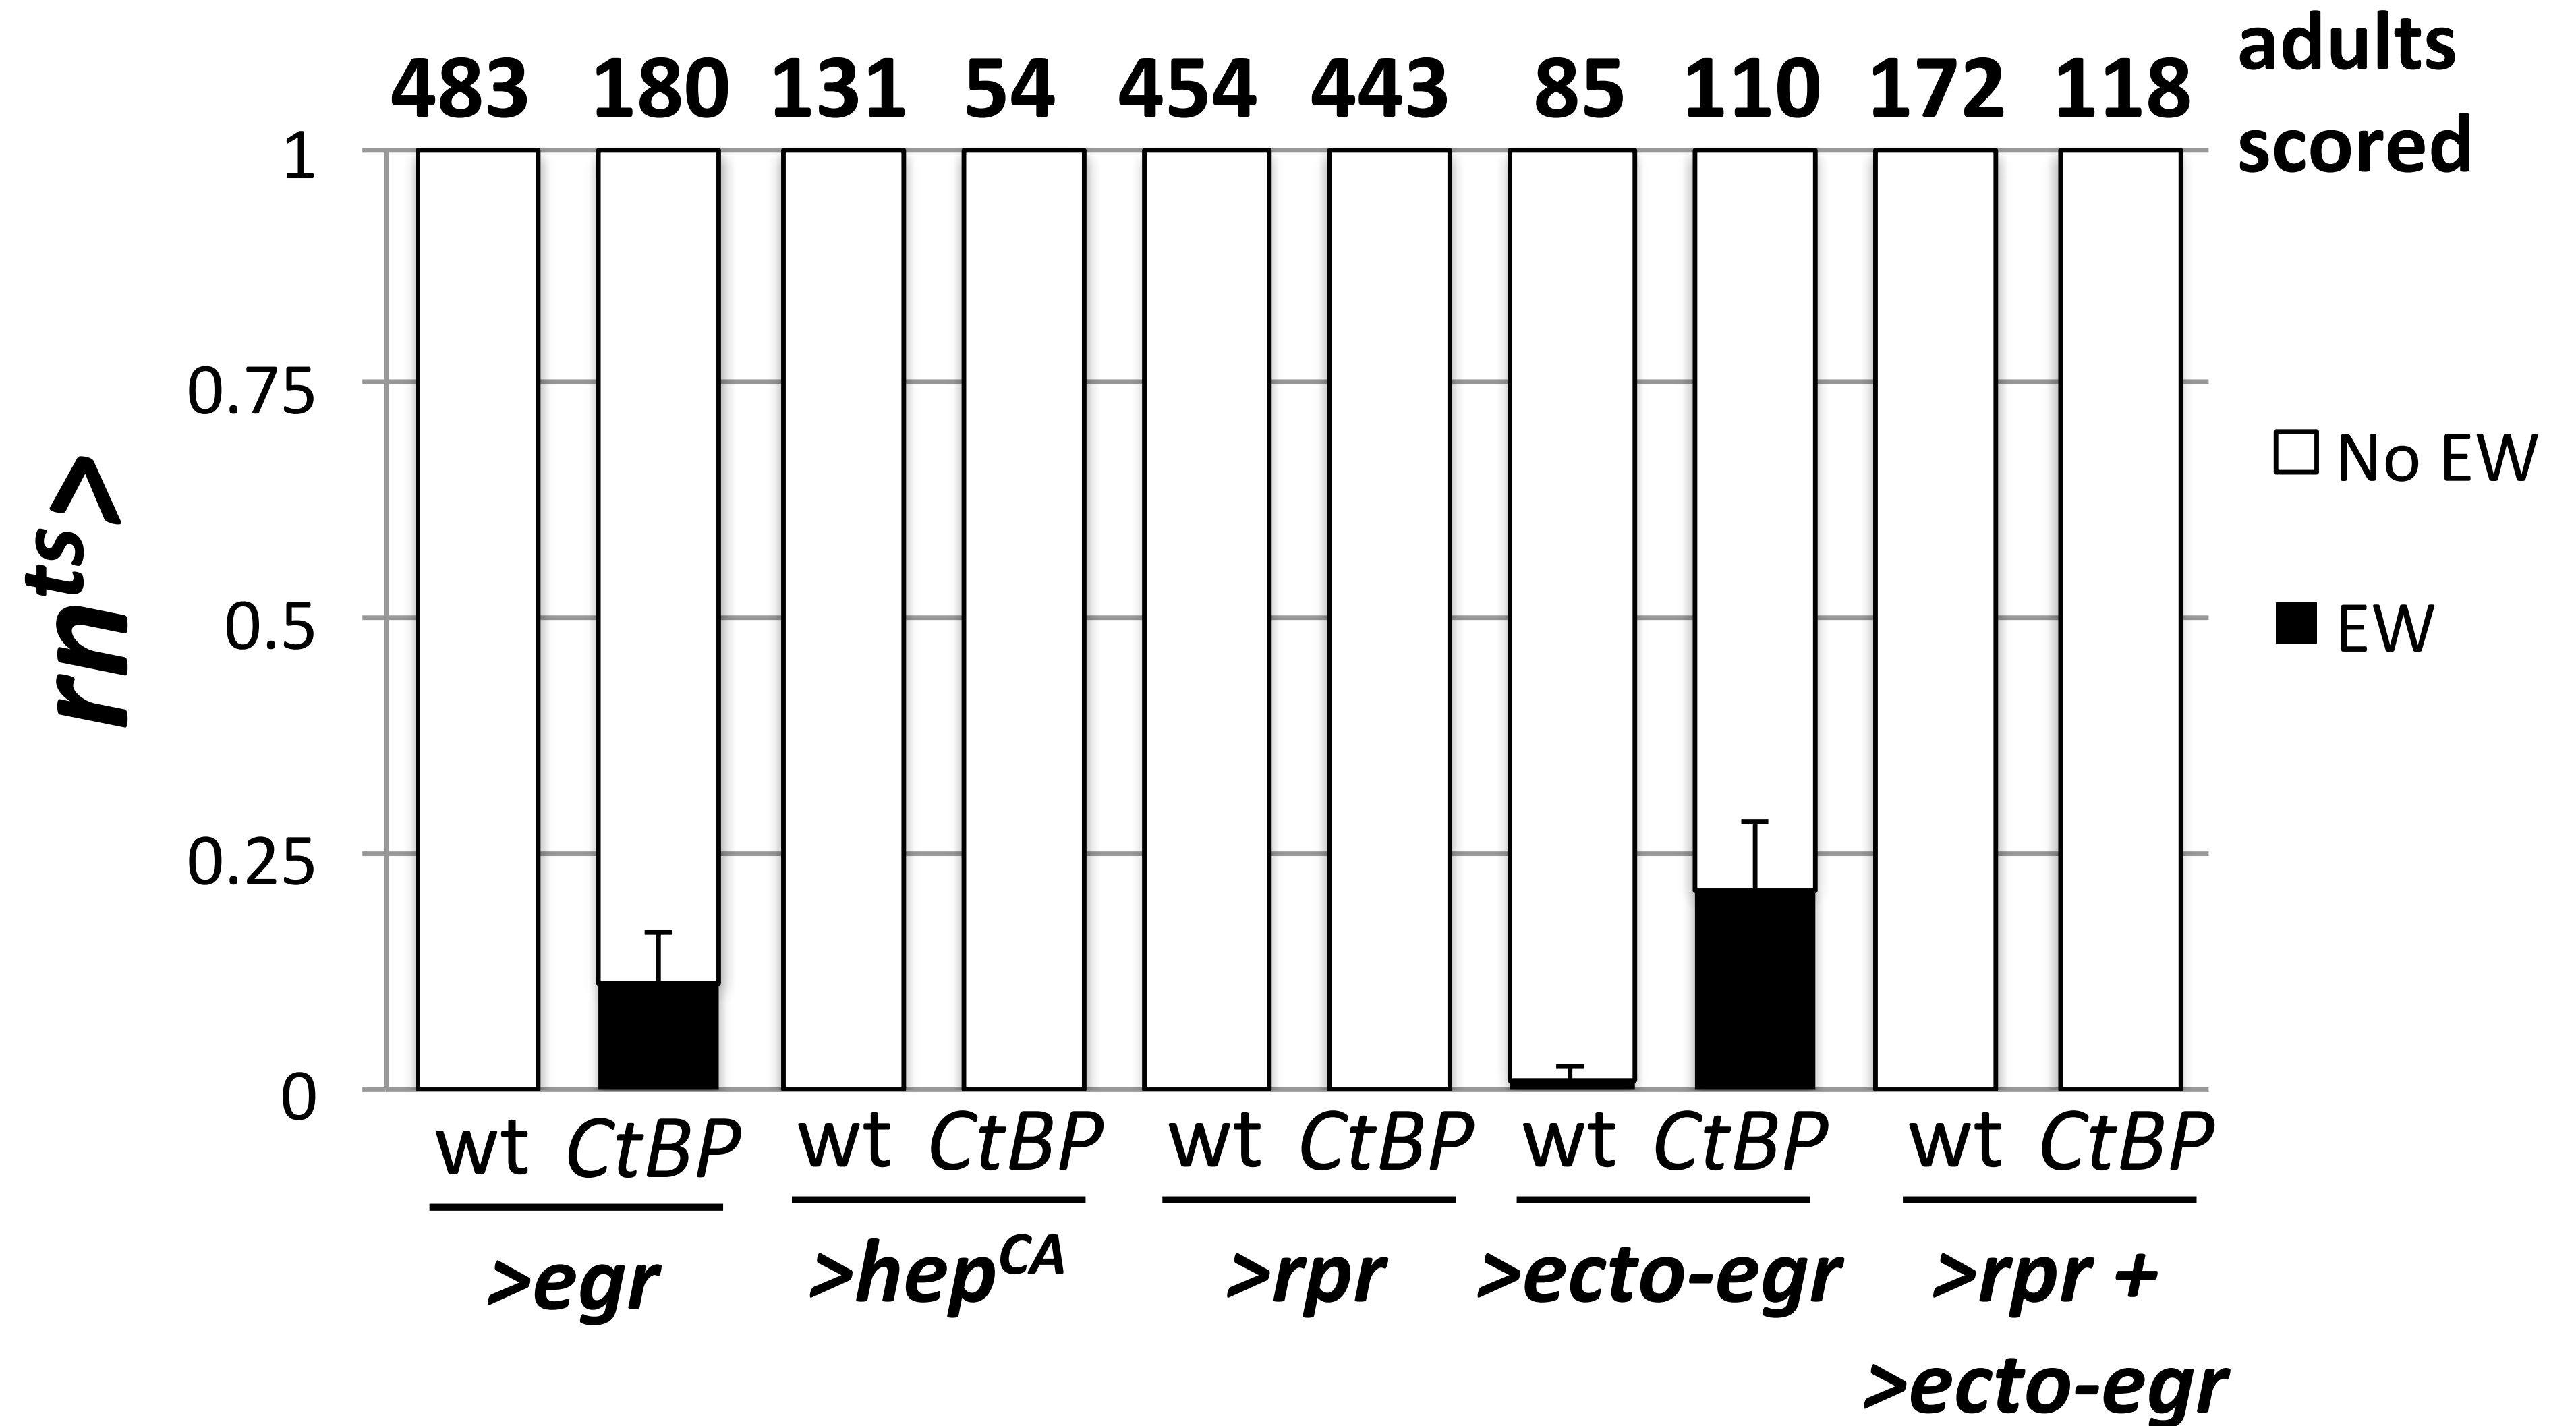

Supplement: supp [file elife-30391-supp-v1.zip]

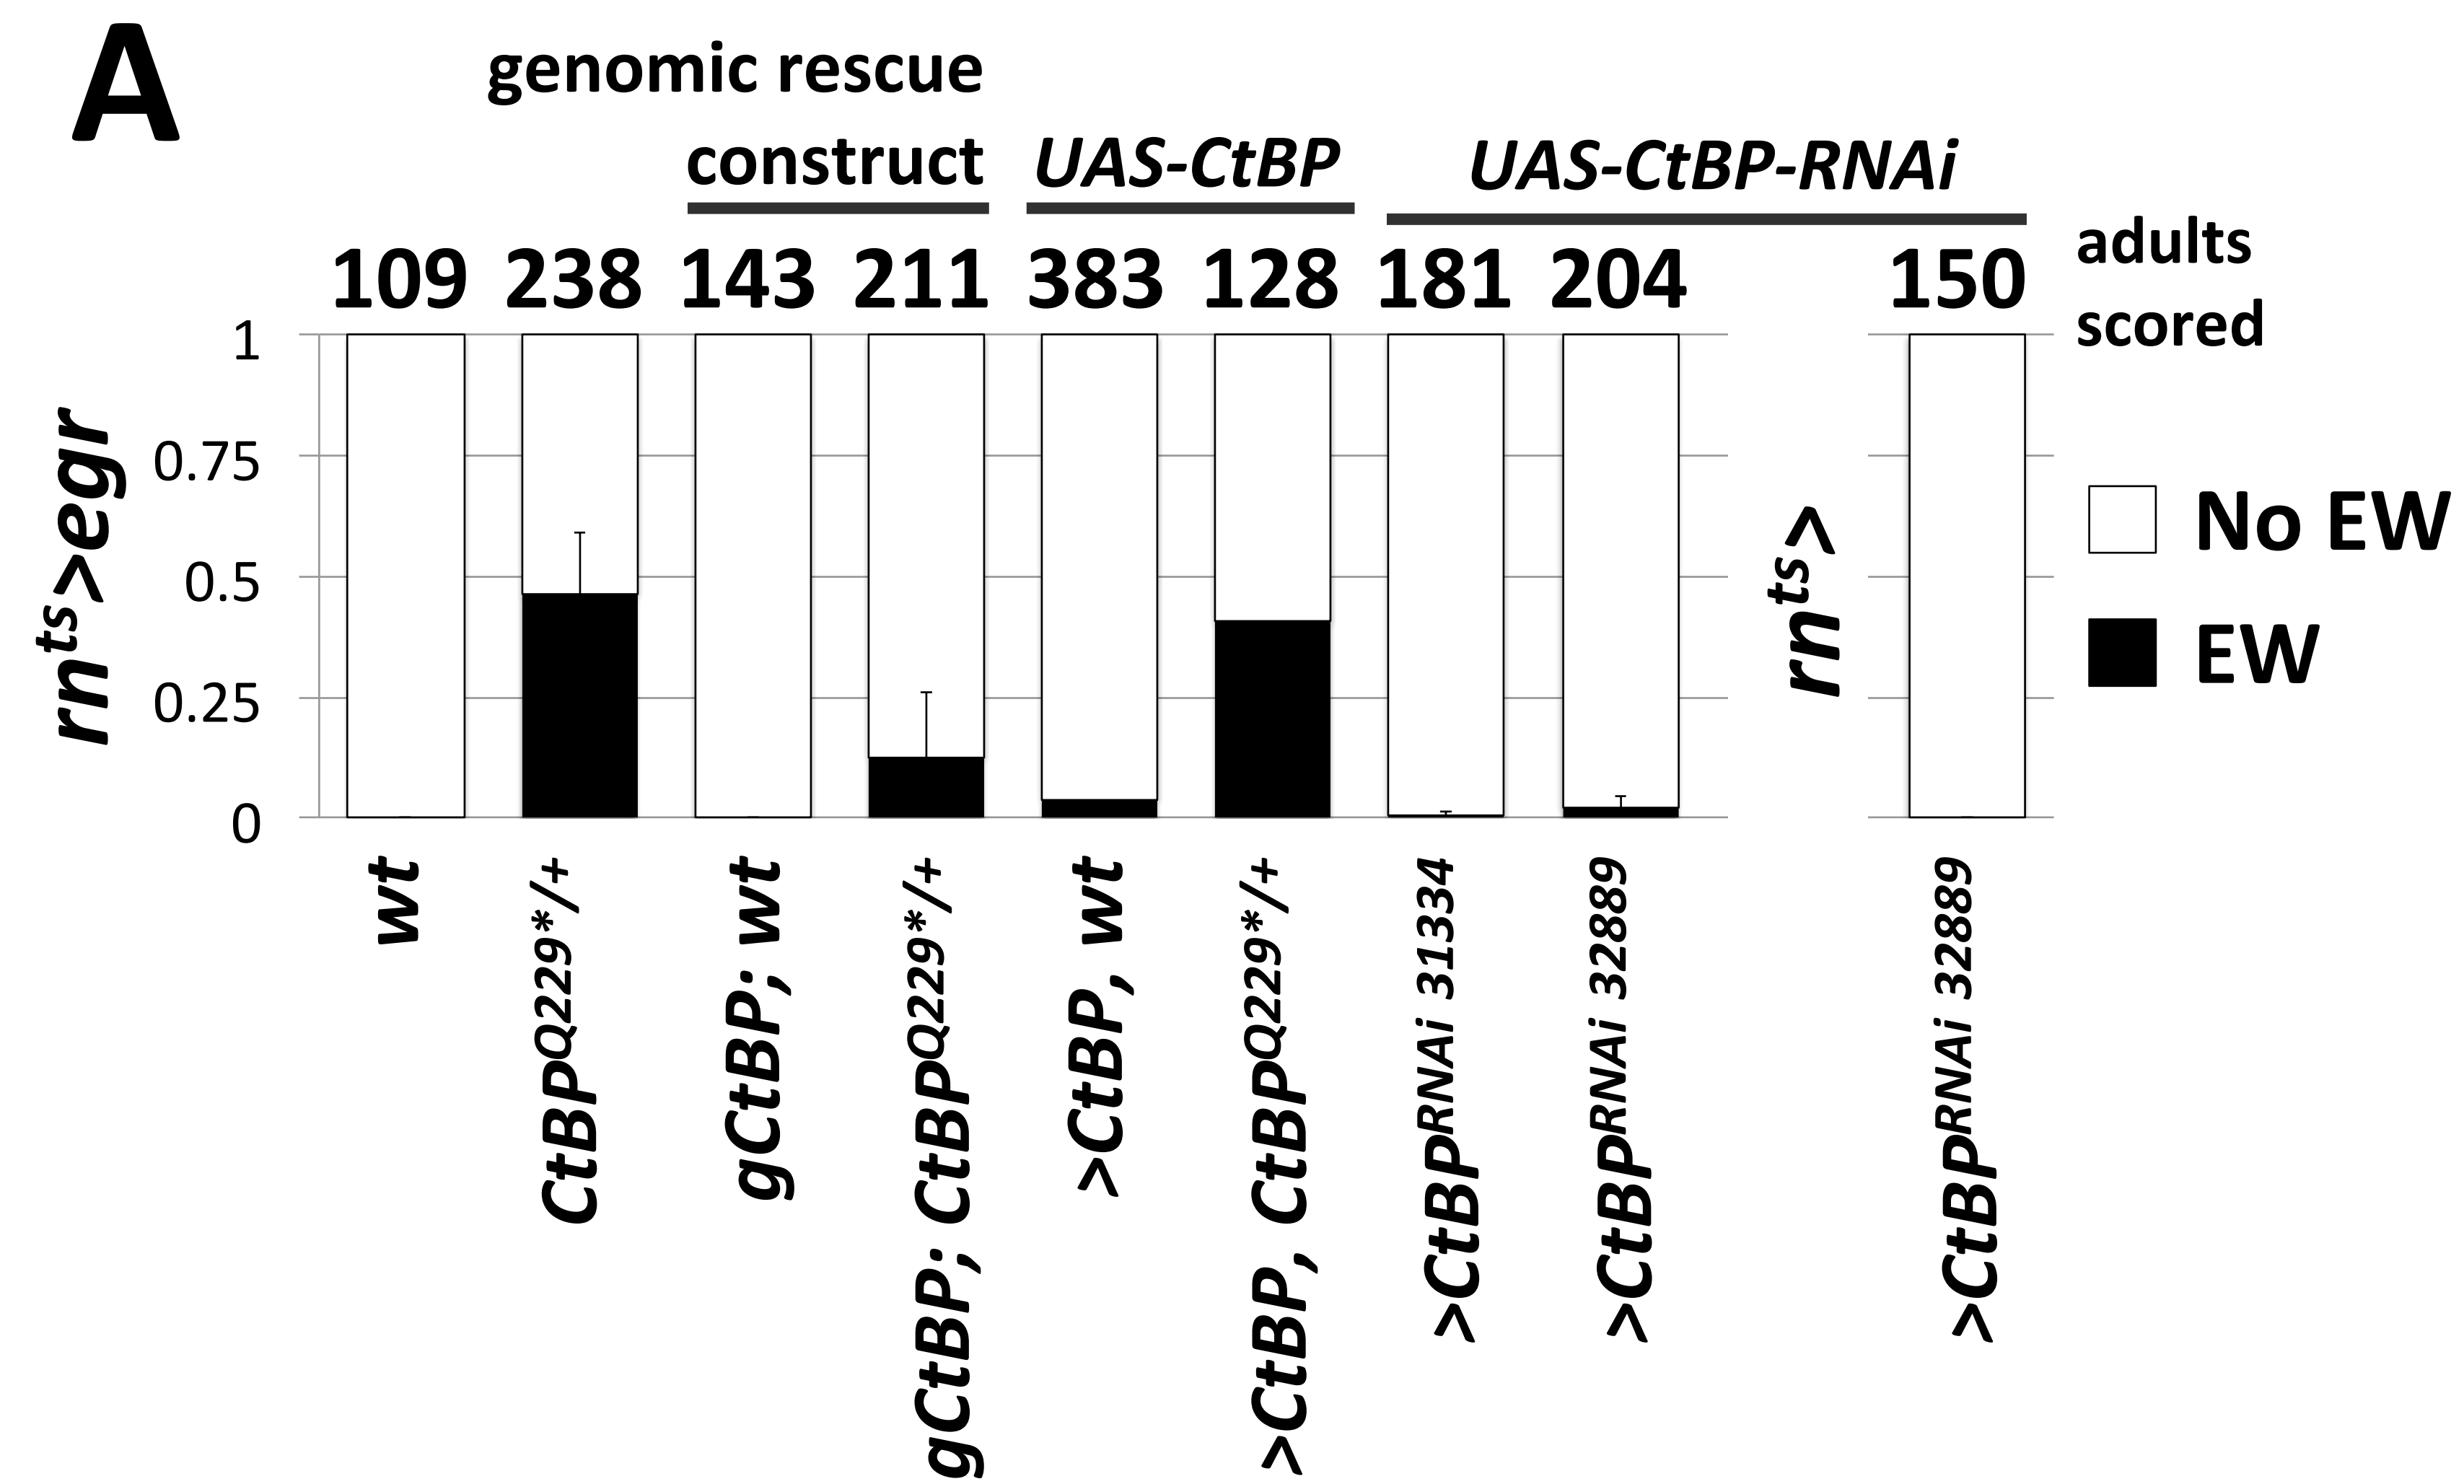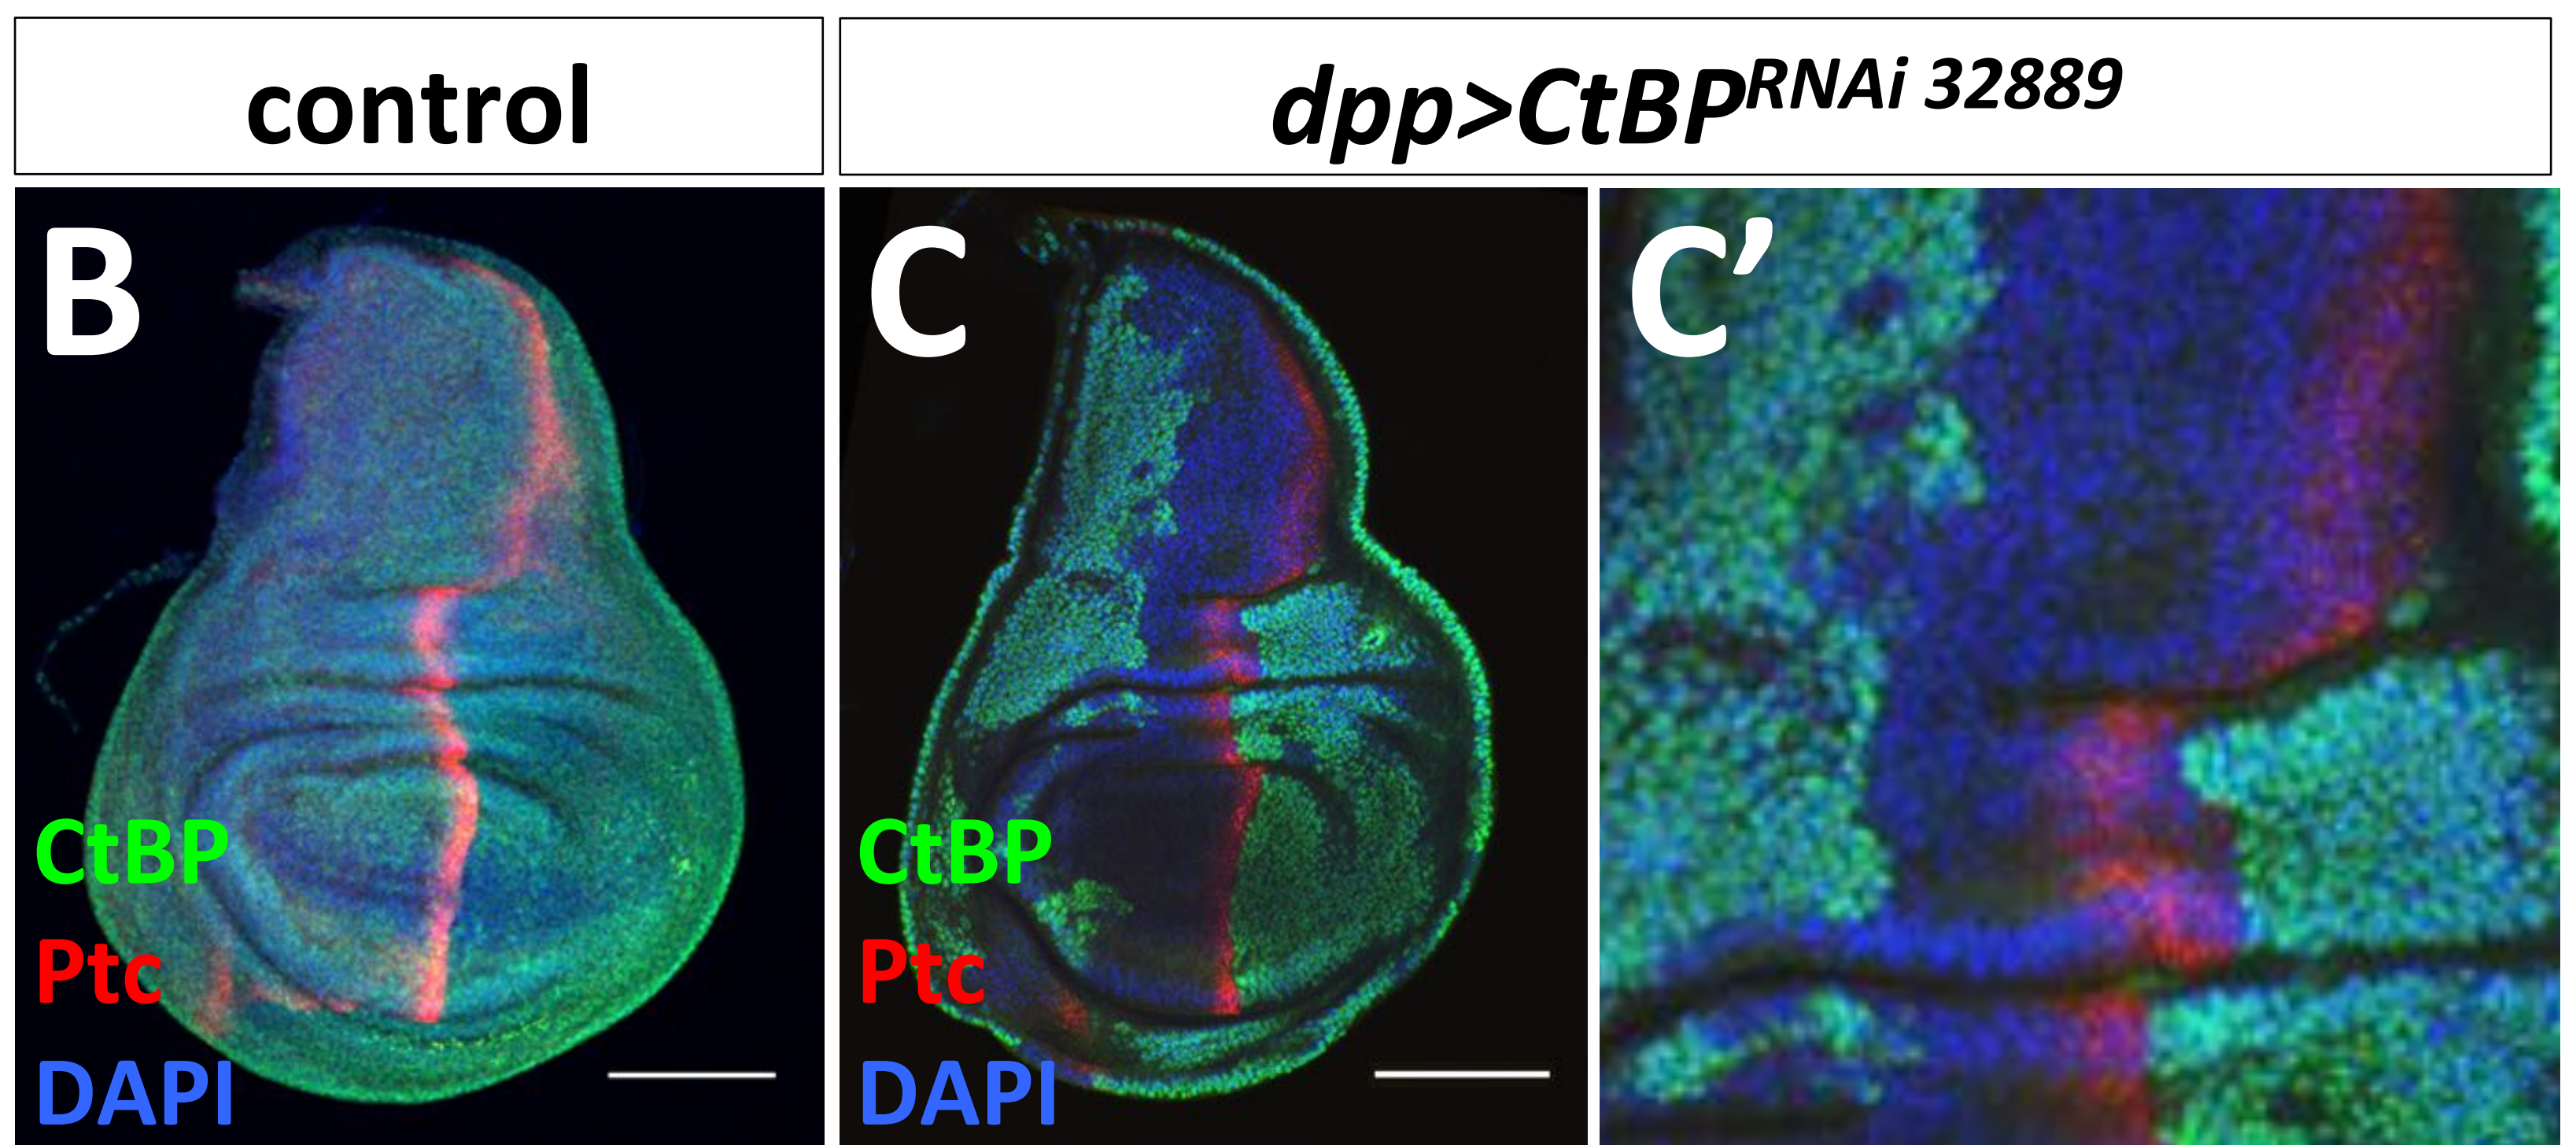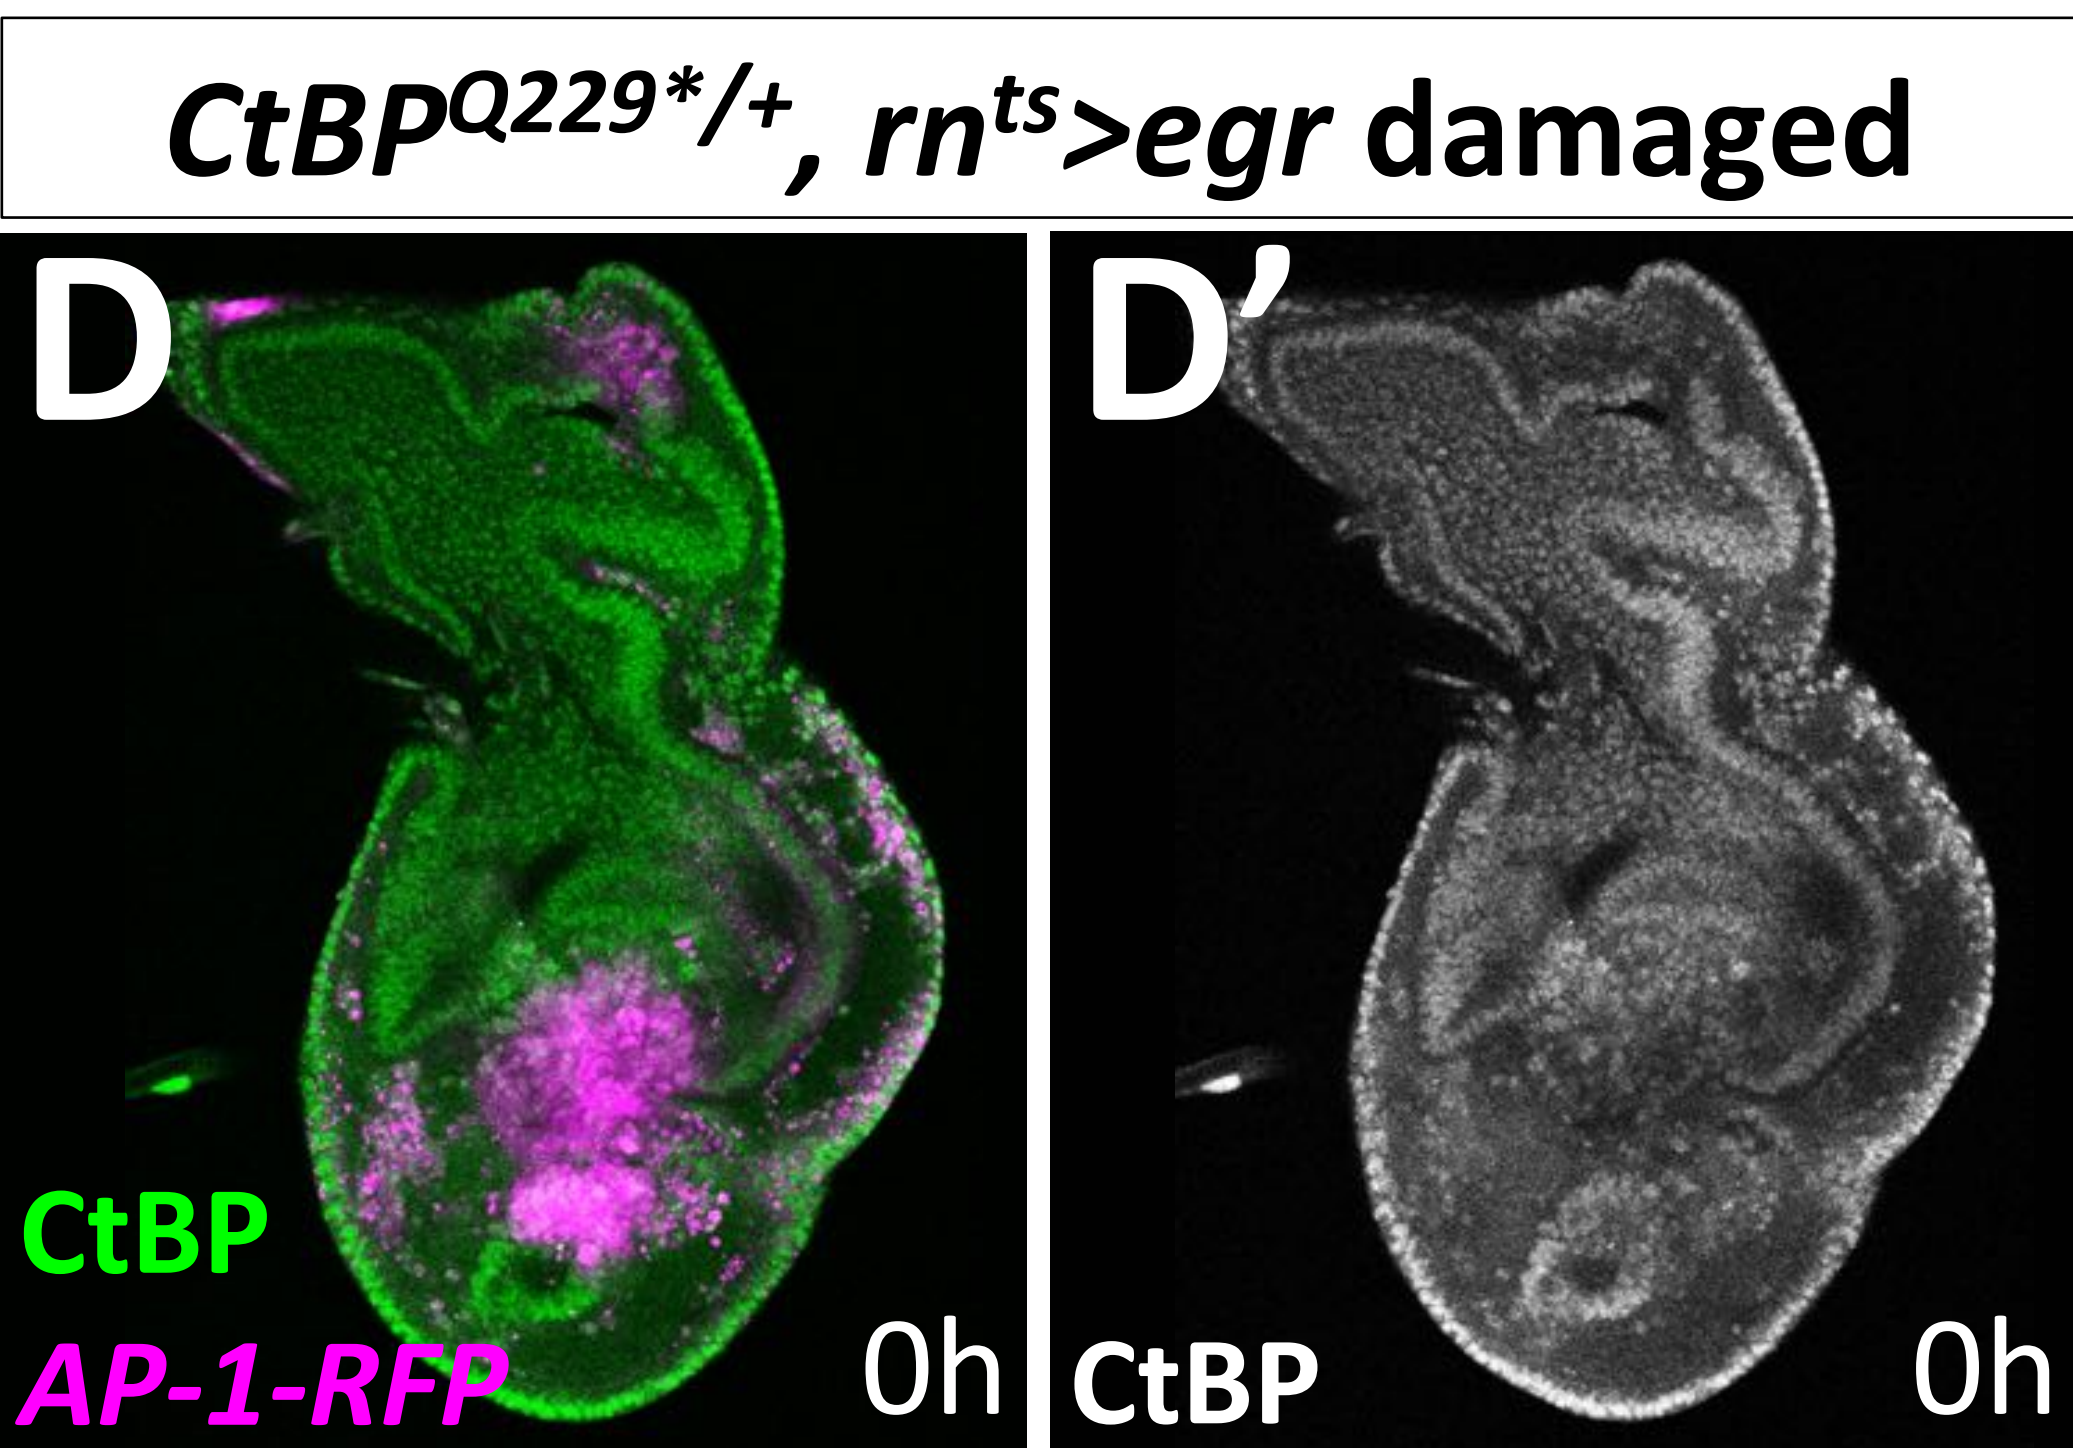

Supplement: supp [file elife-30391-supp-v1.zip]

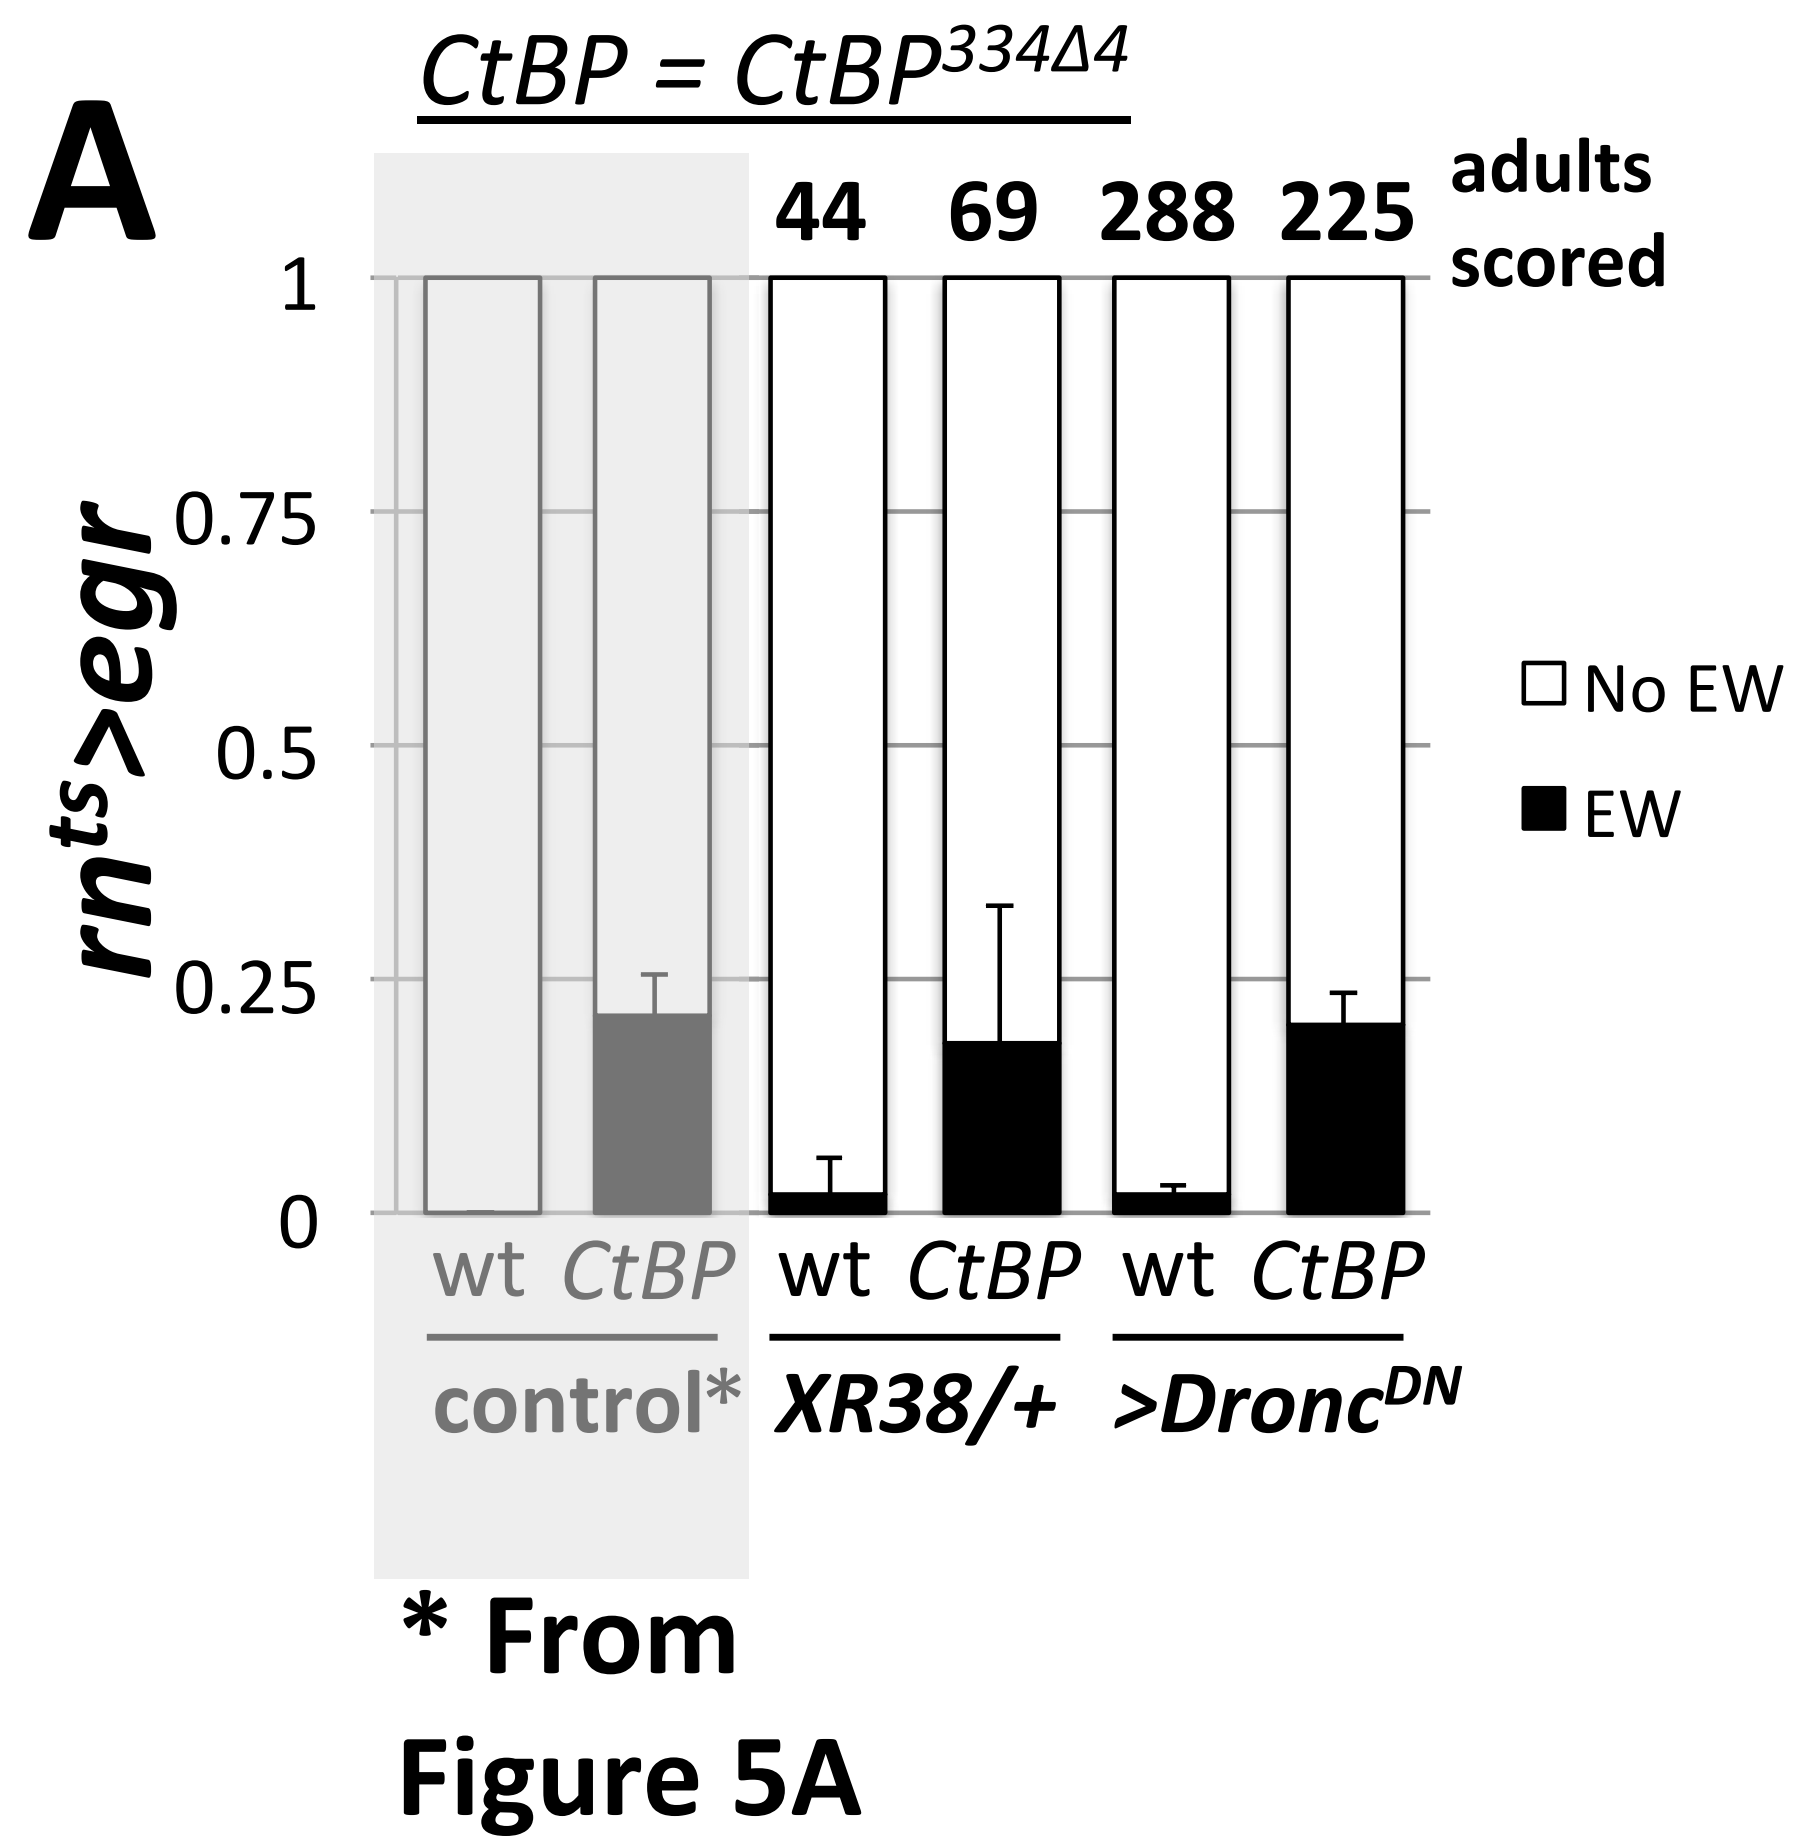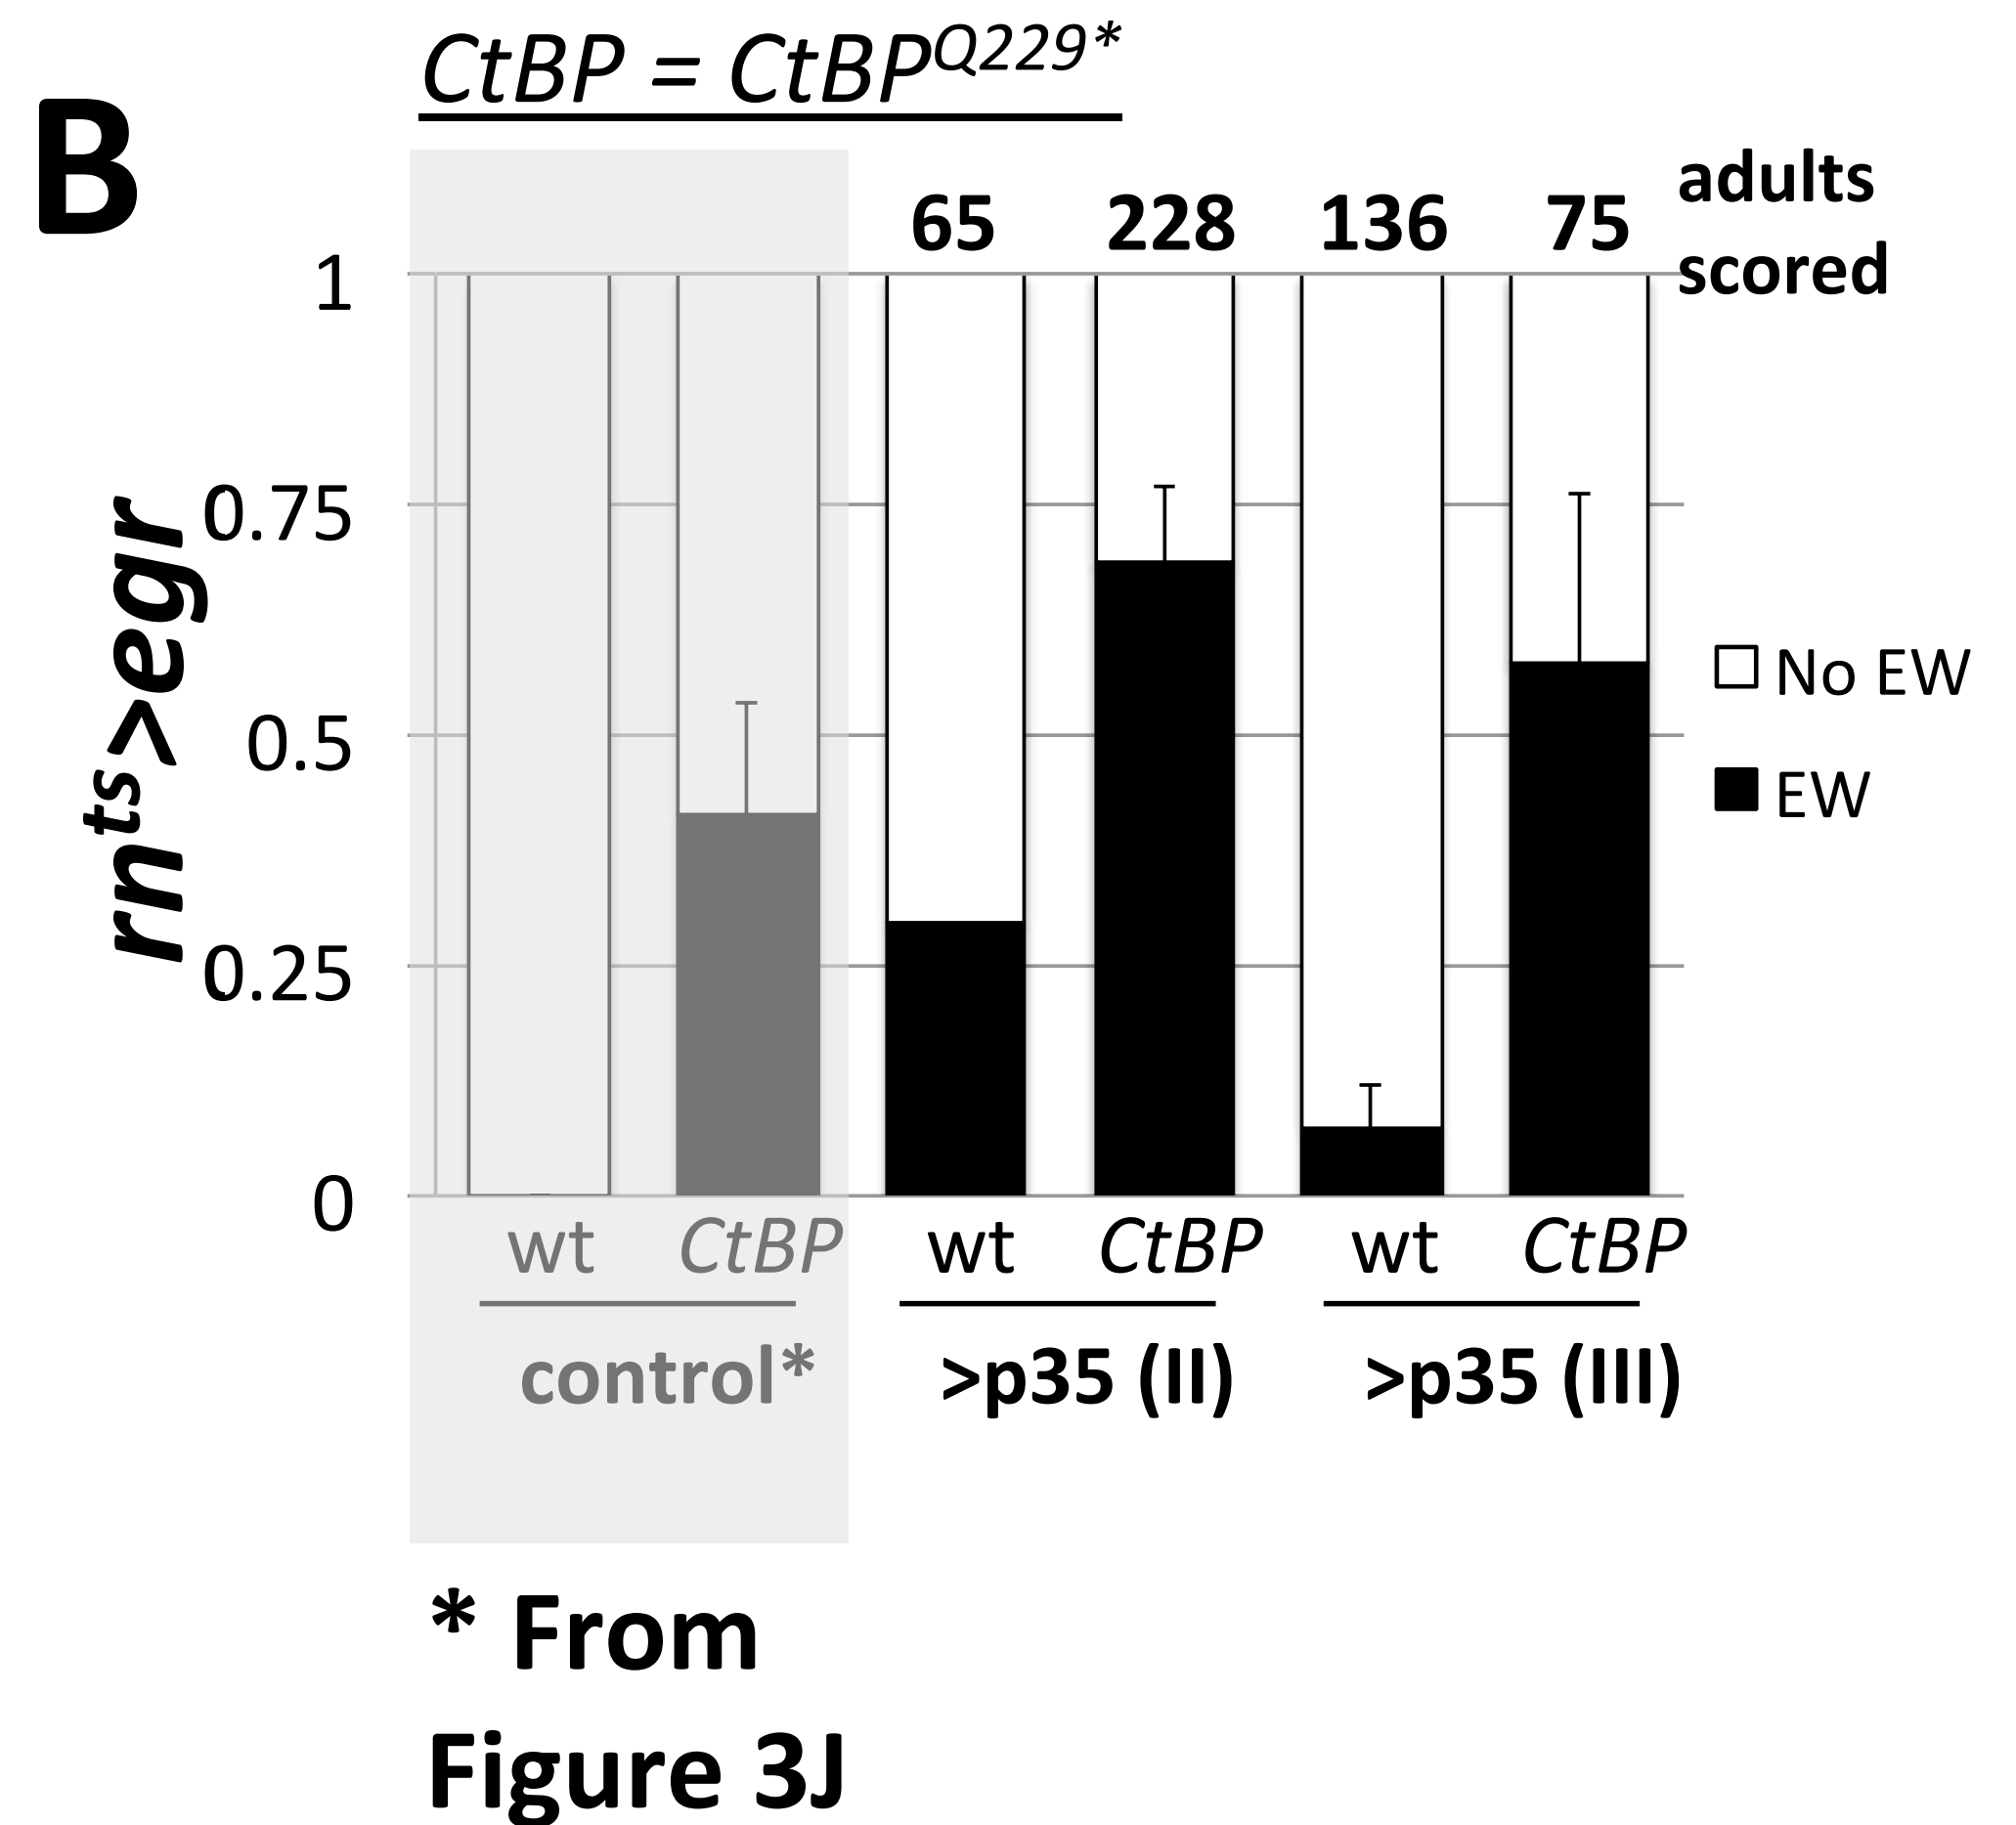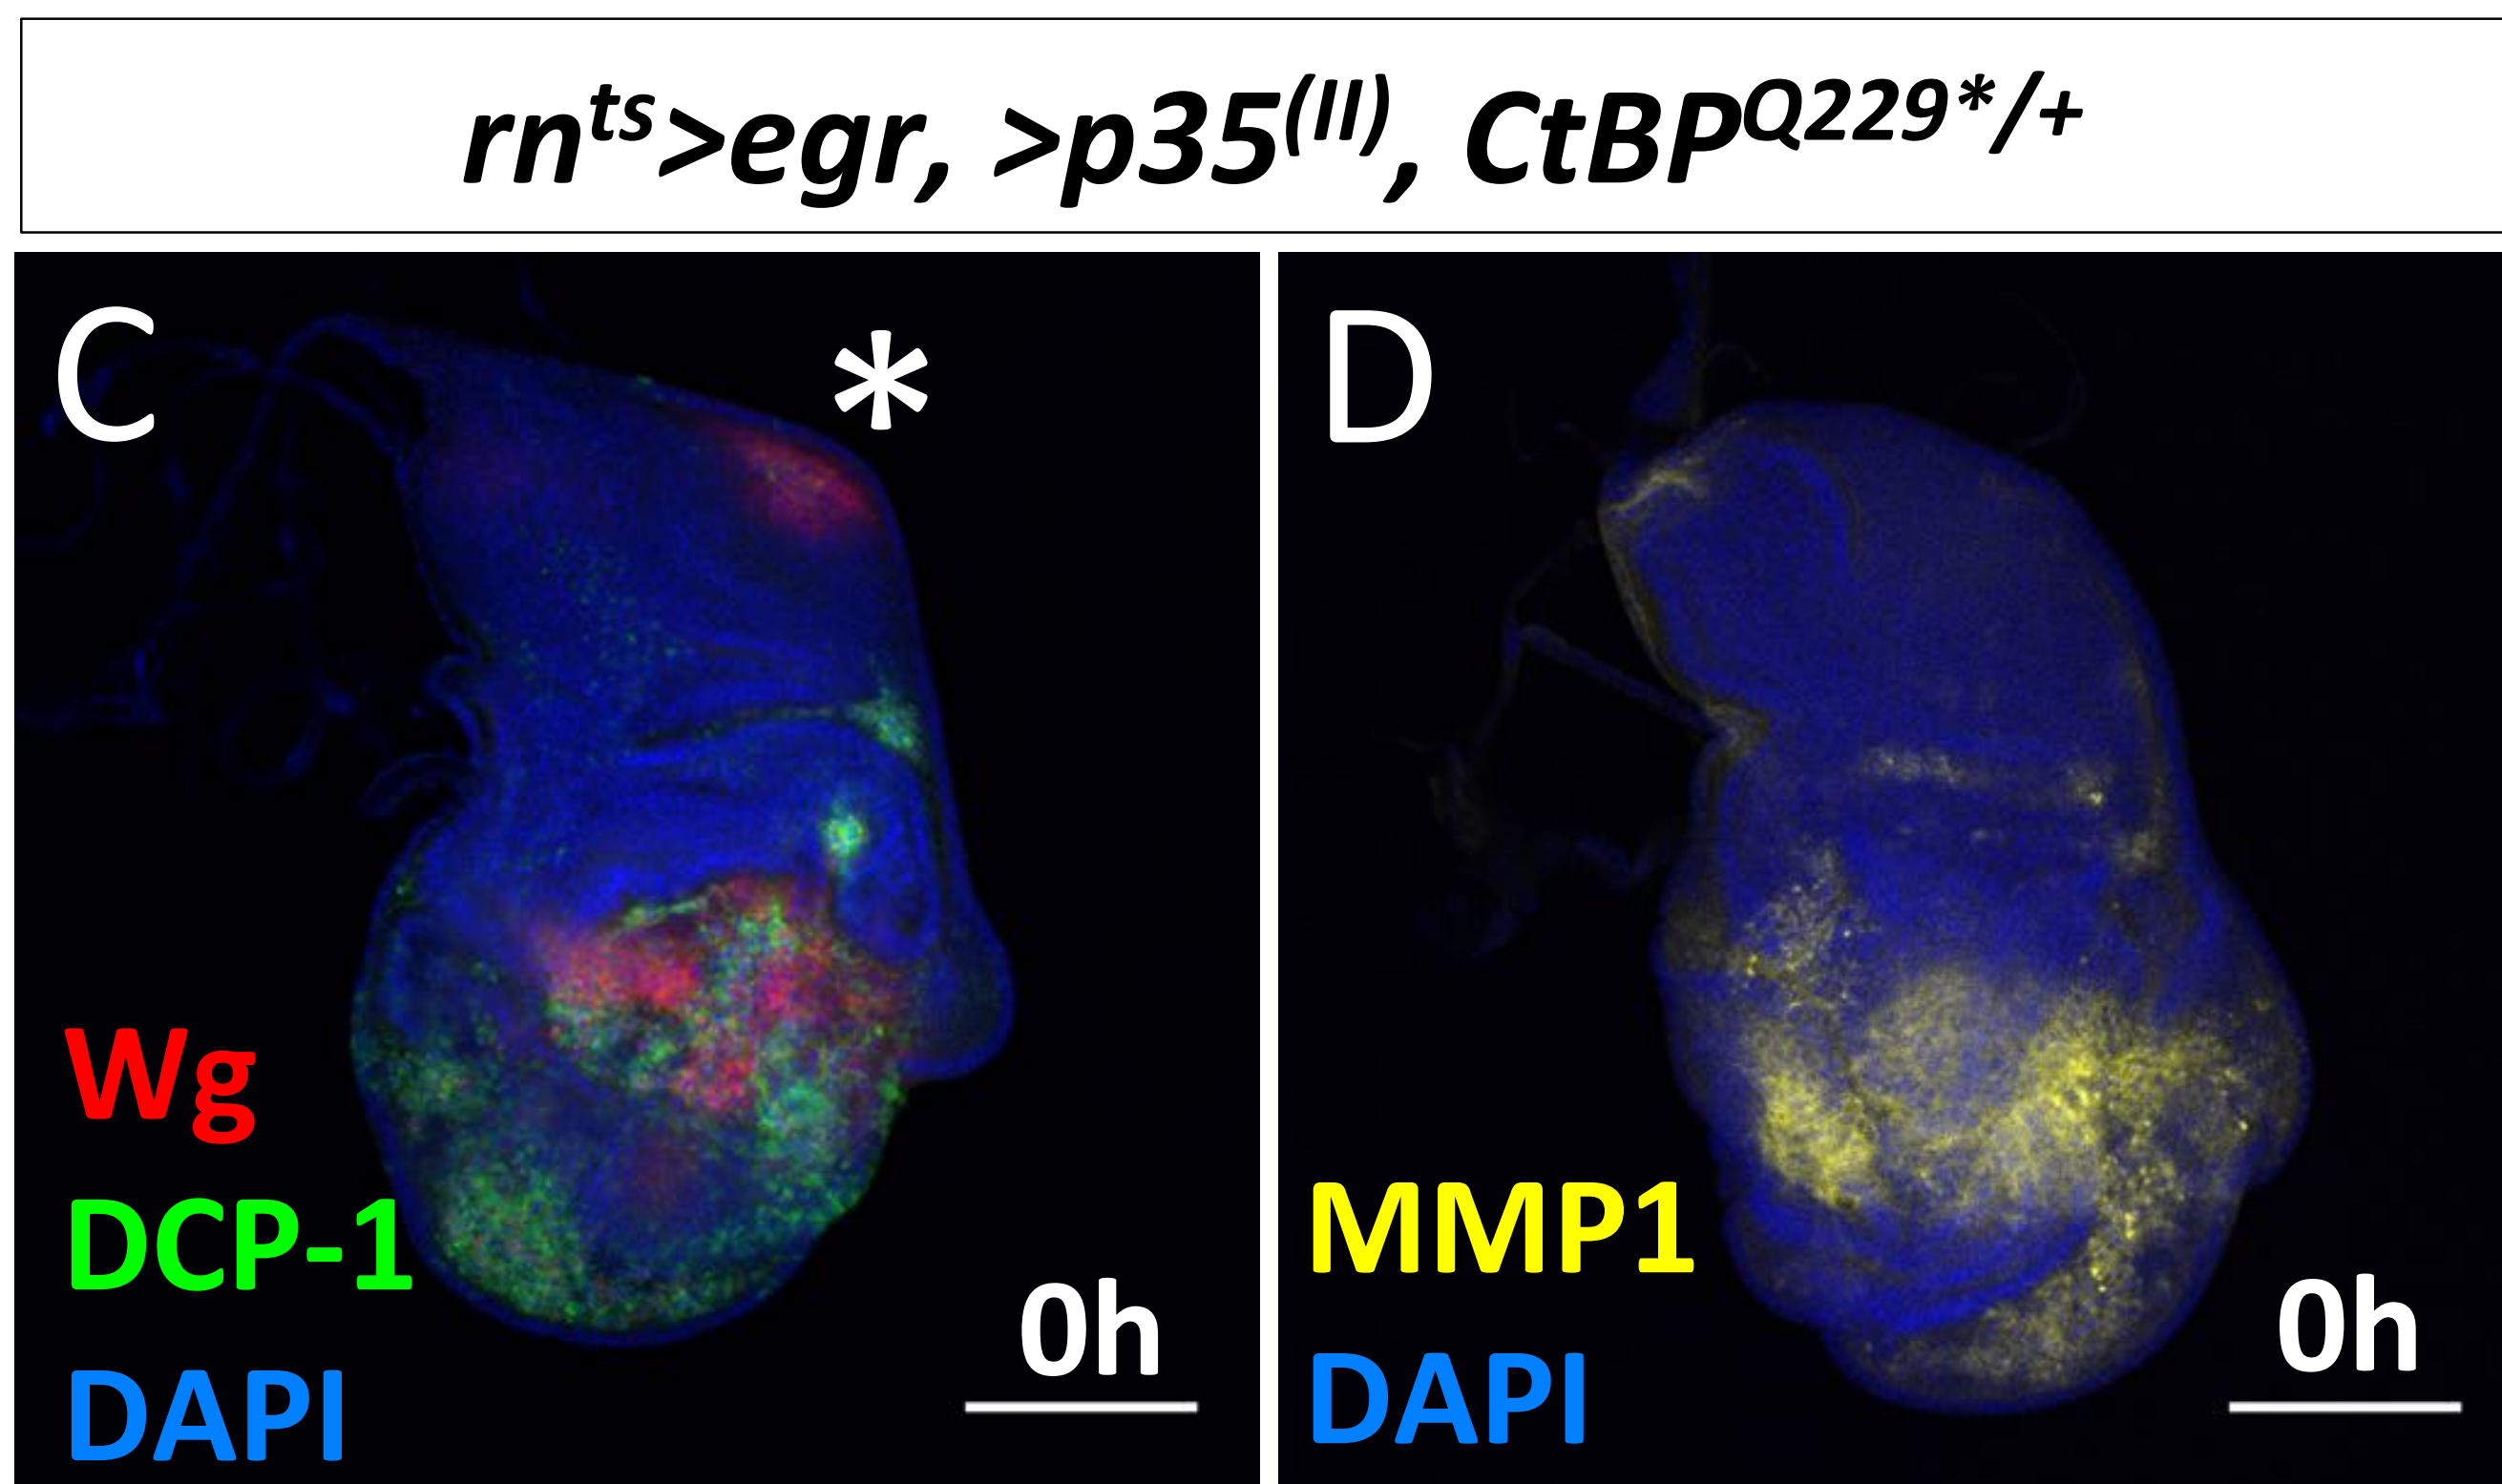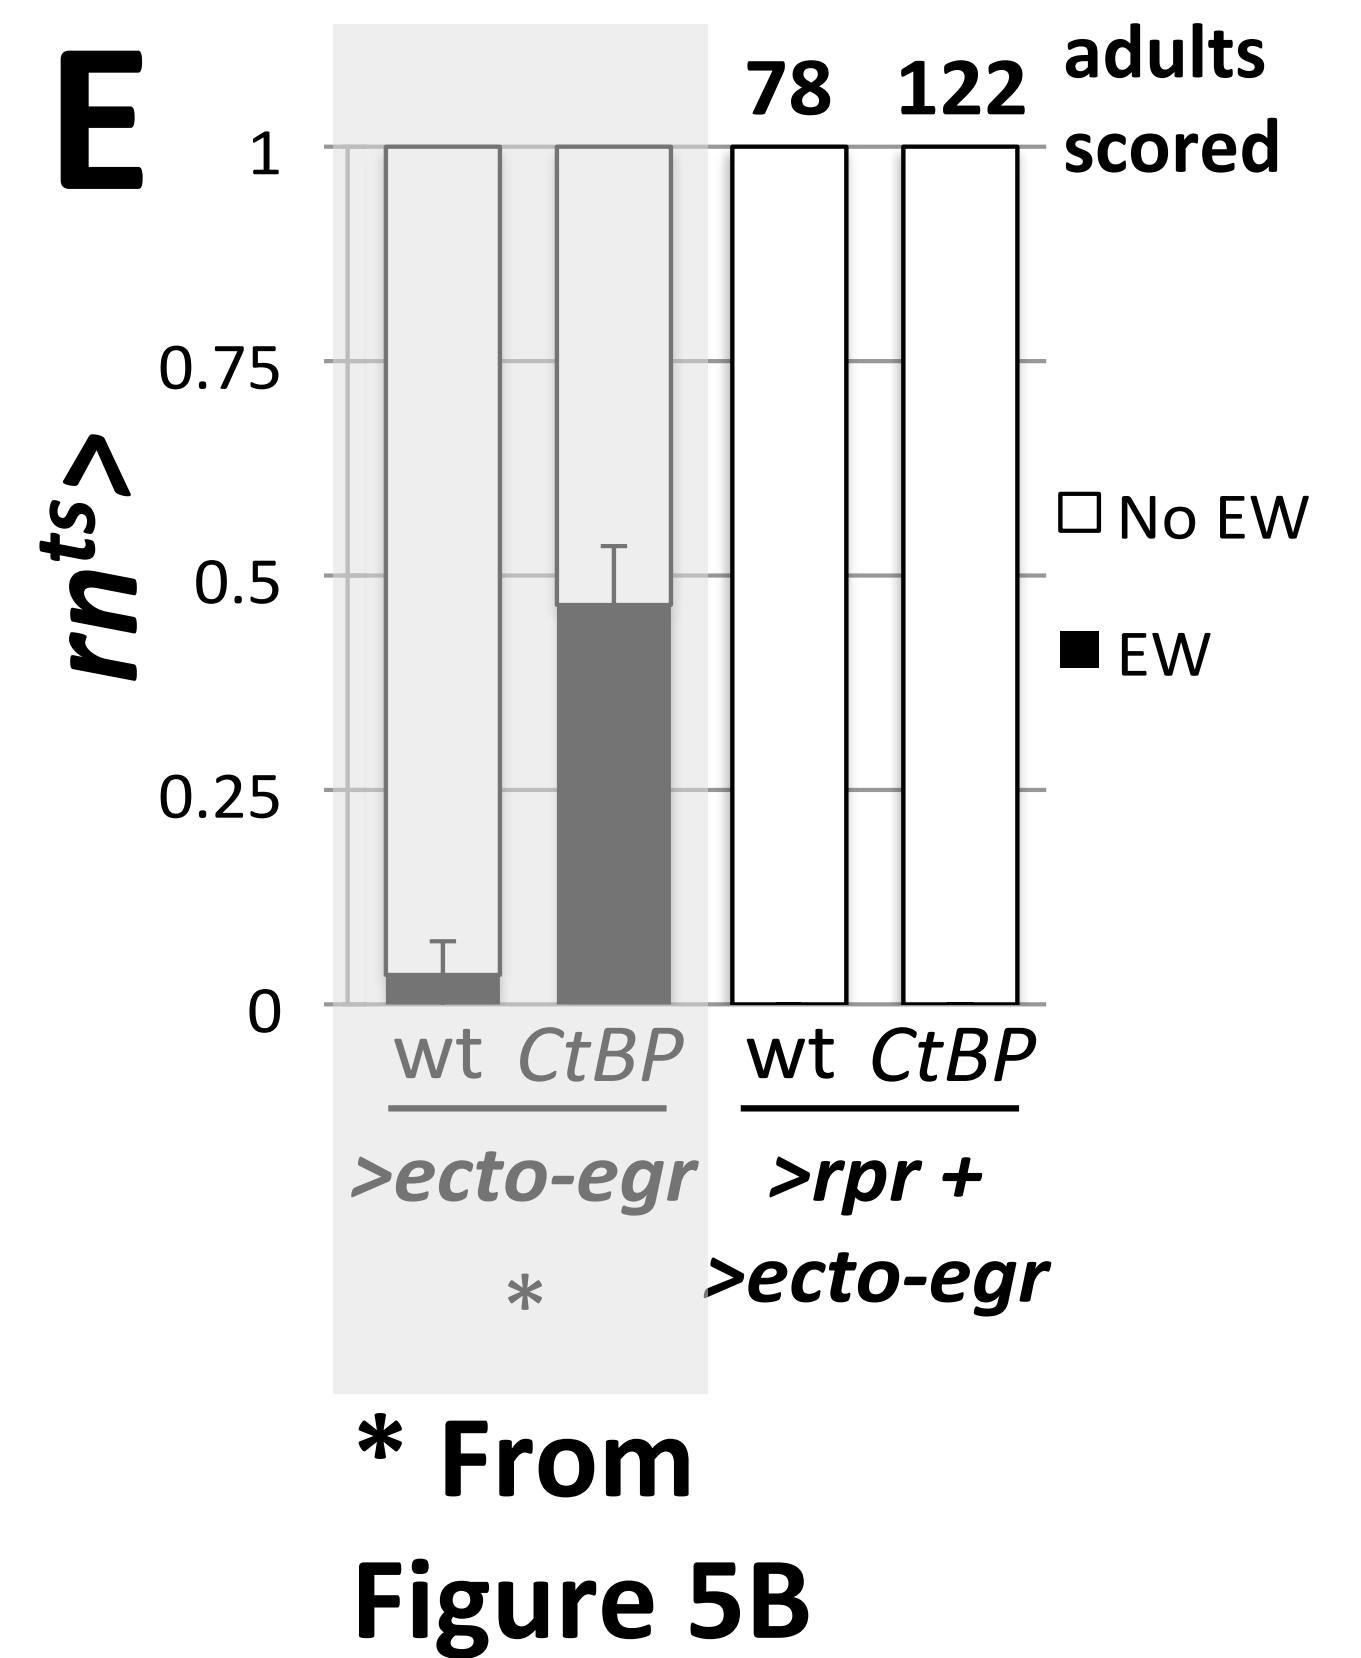

Supplement: supp [file elife-30391-supp-v1.zip]

A

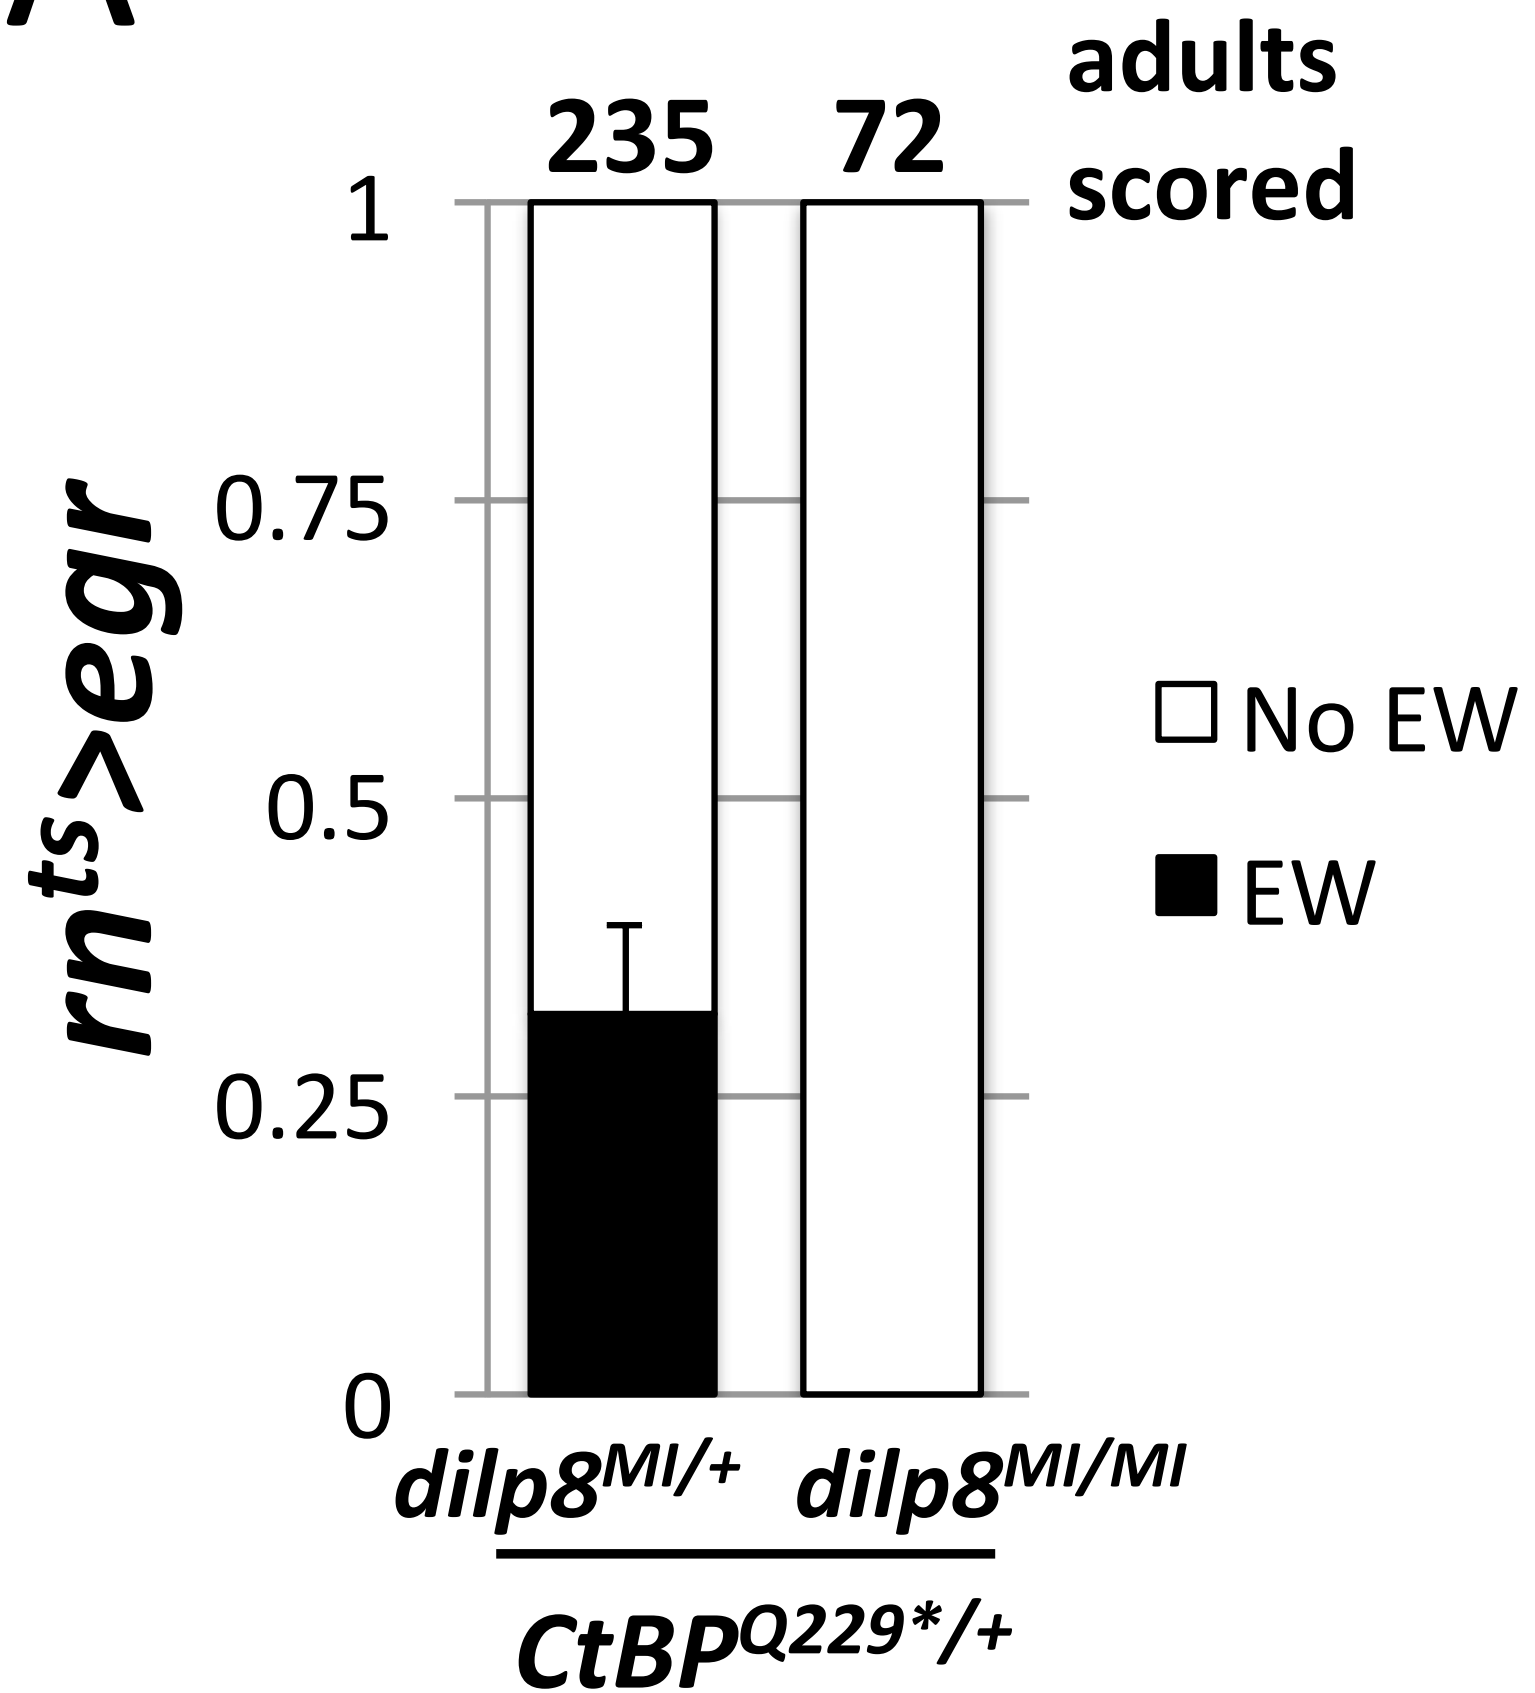

B

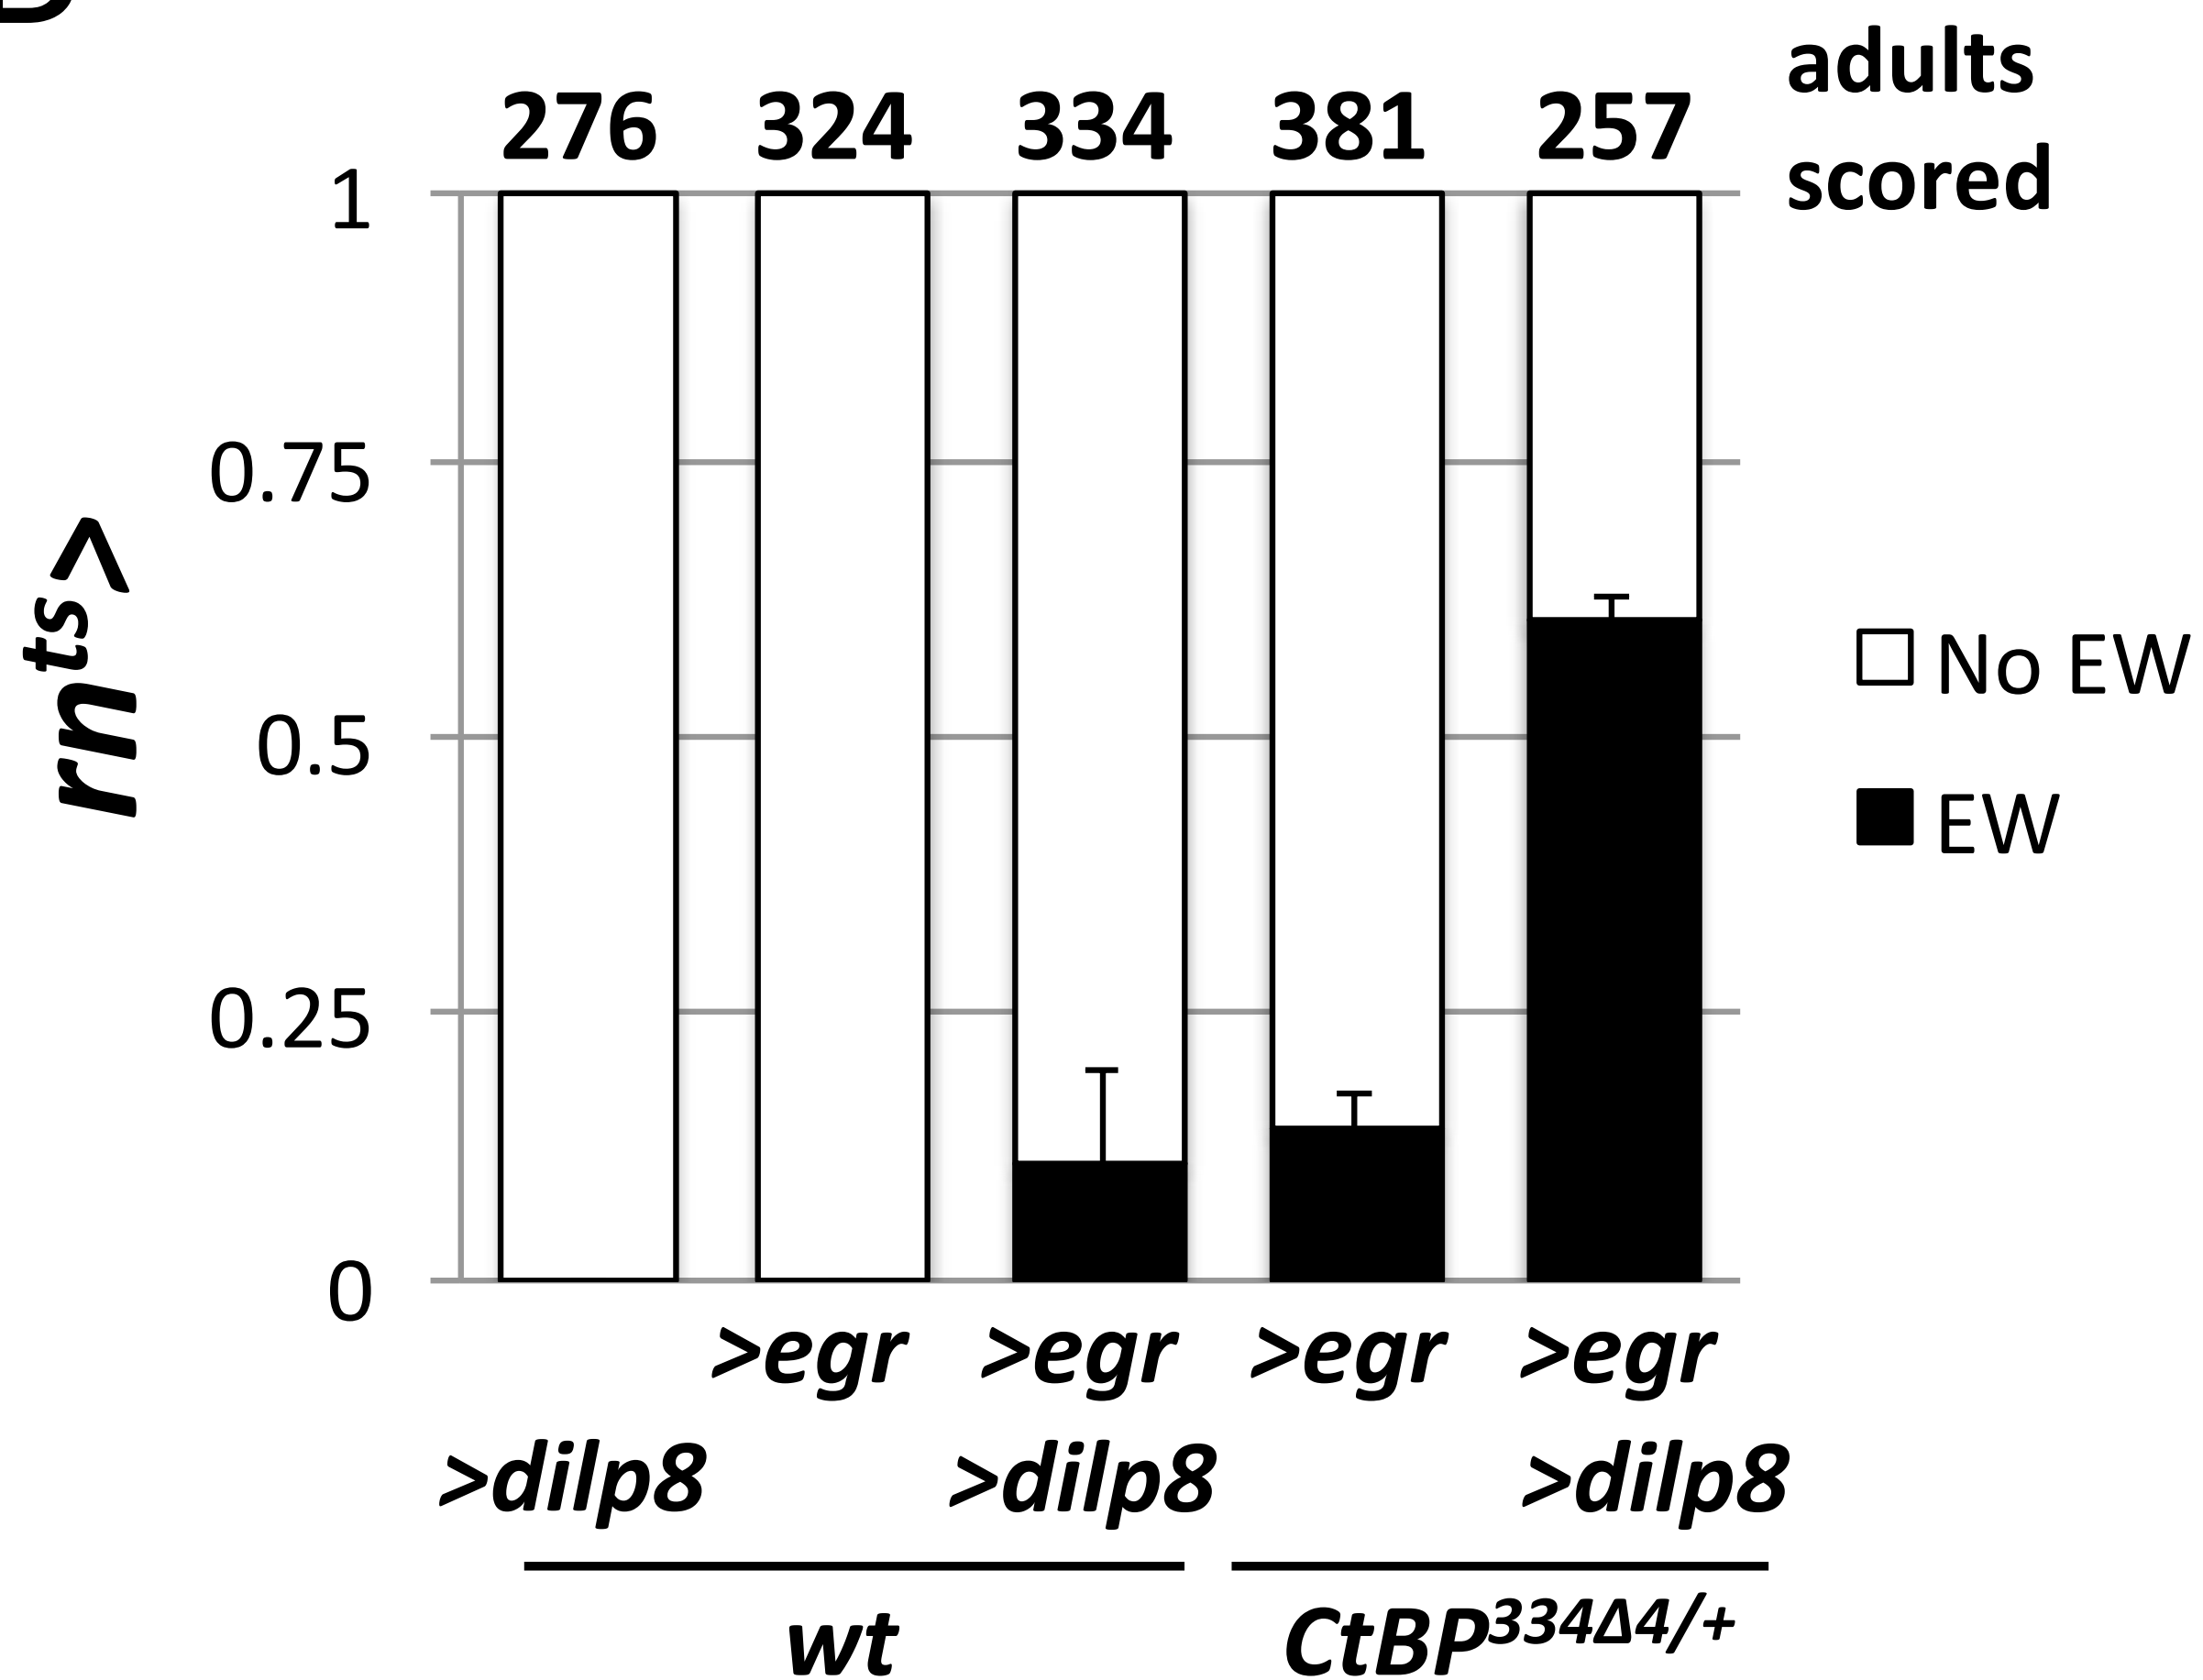

Supplement: supp [file elife-30391-supp-v1.zip]

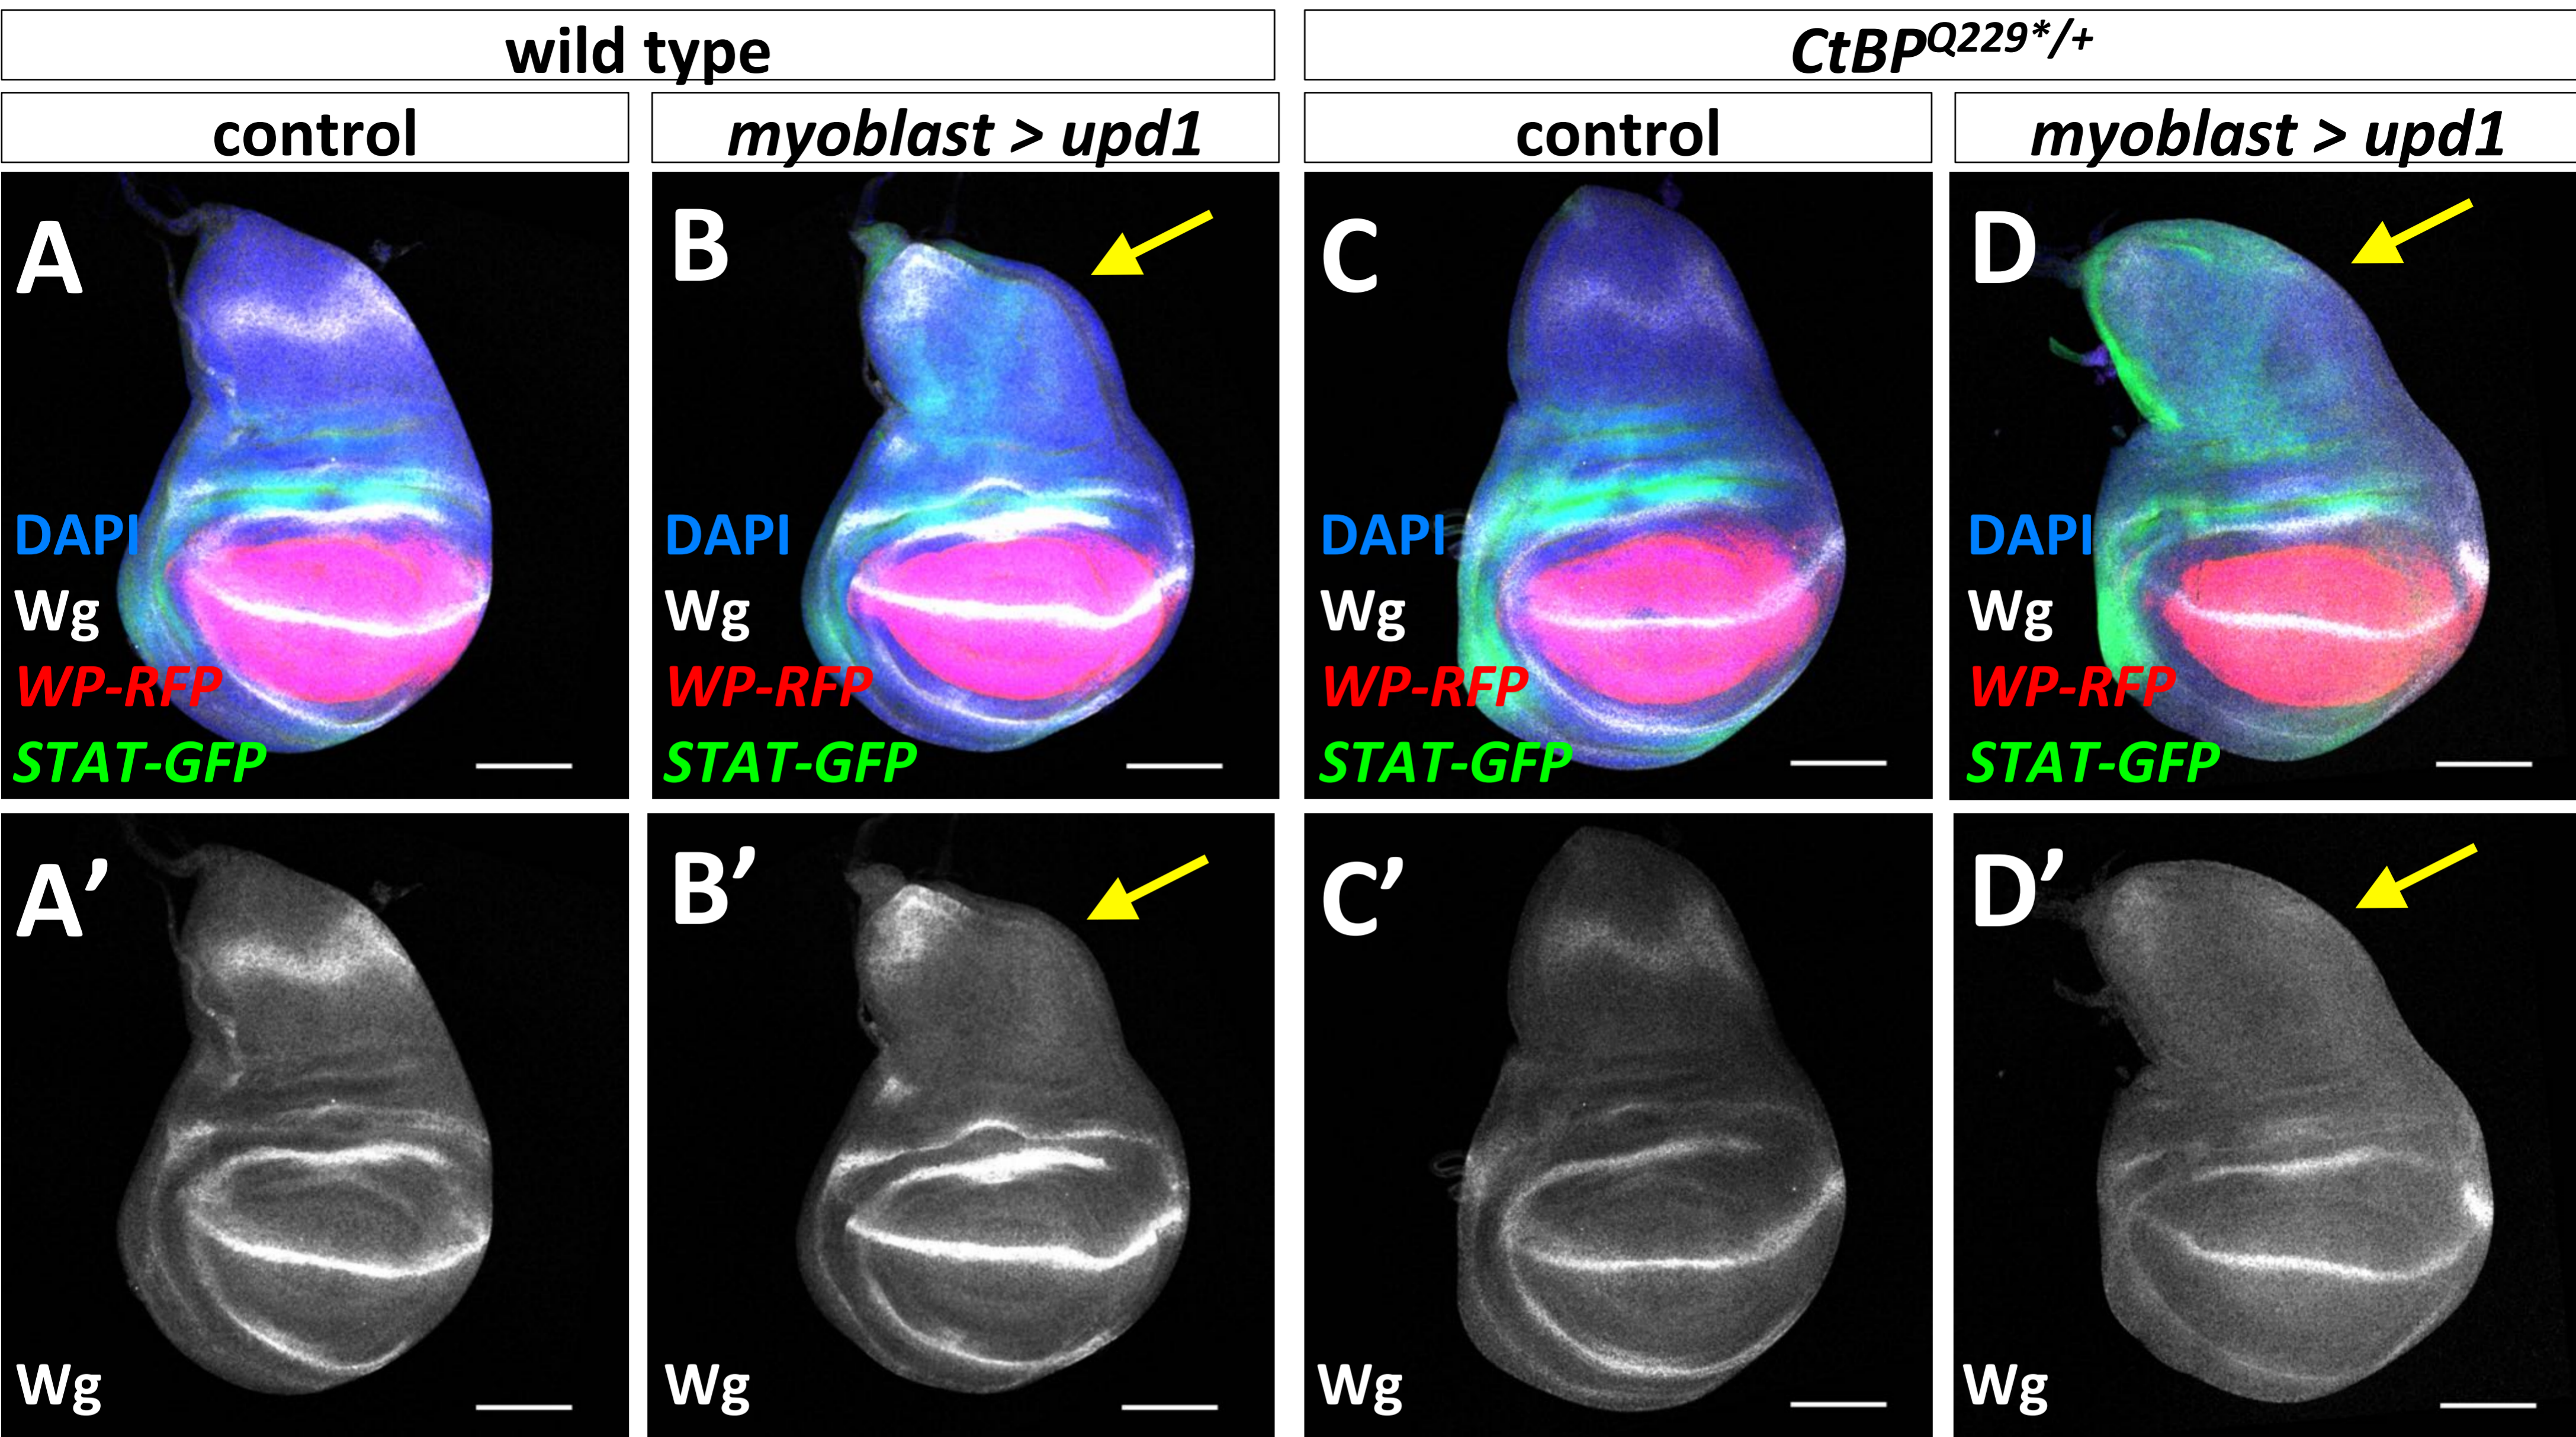

*myoblast > upd1*

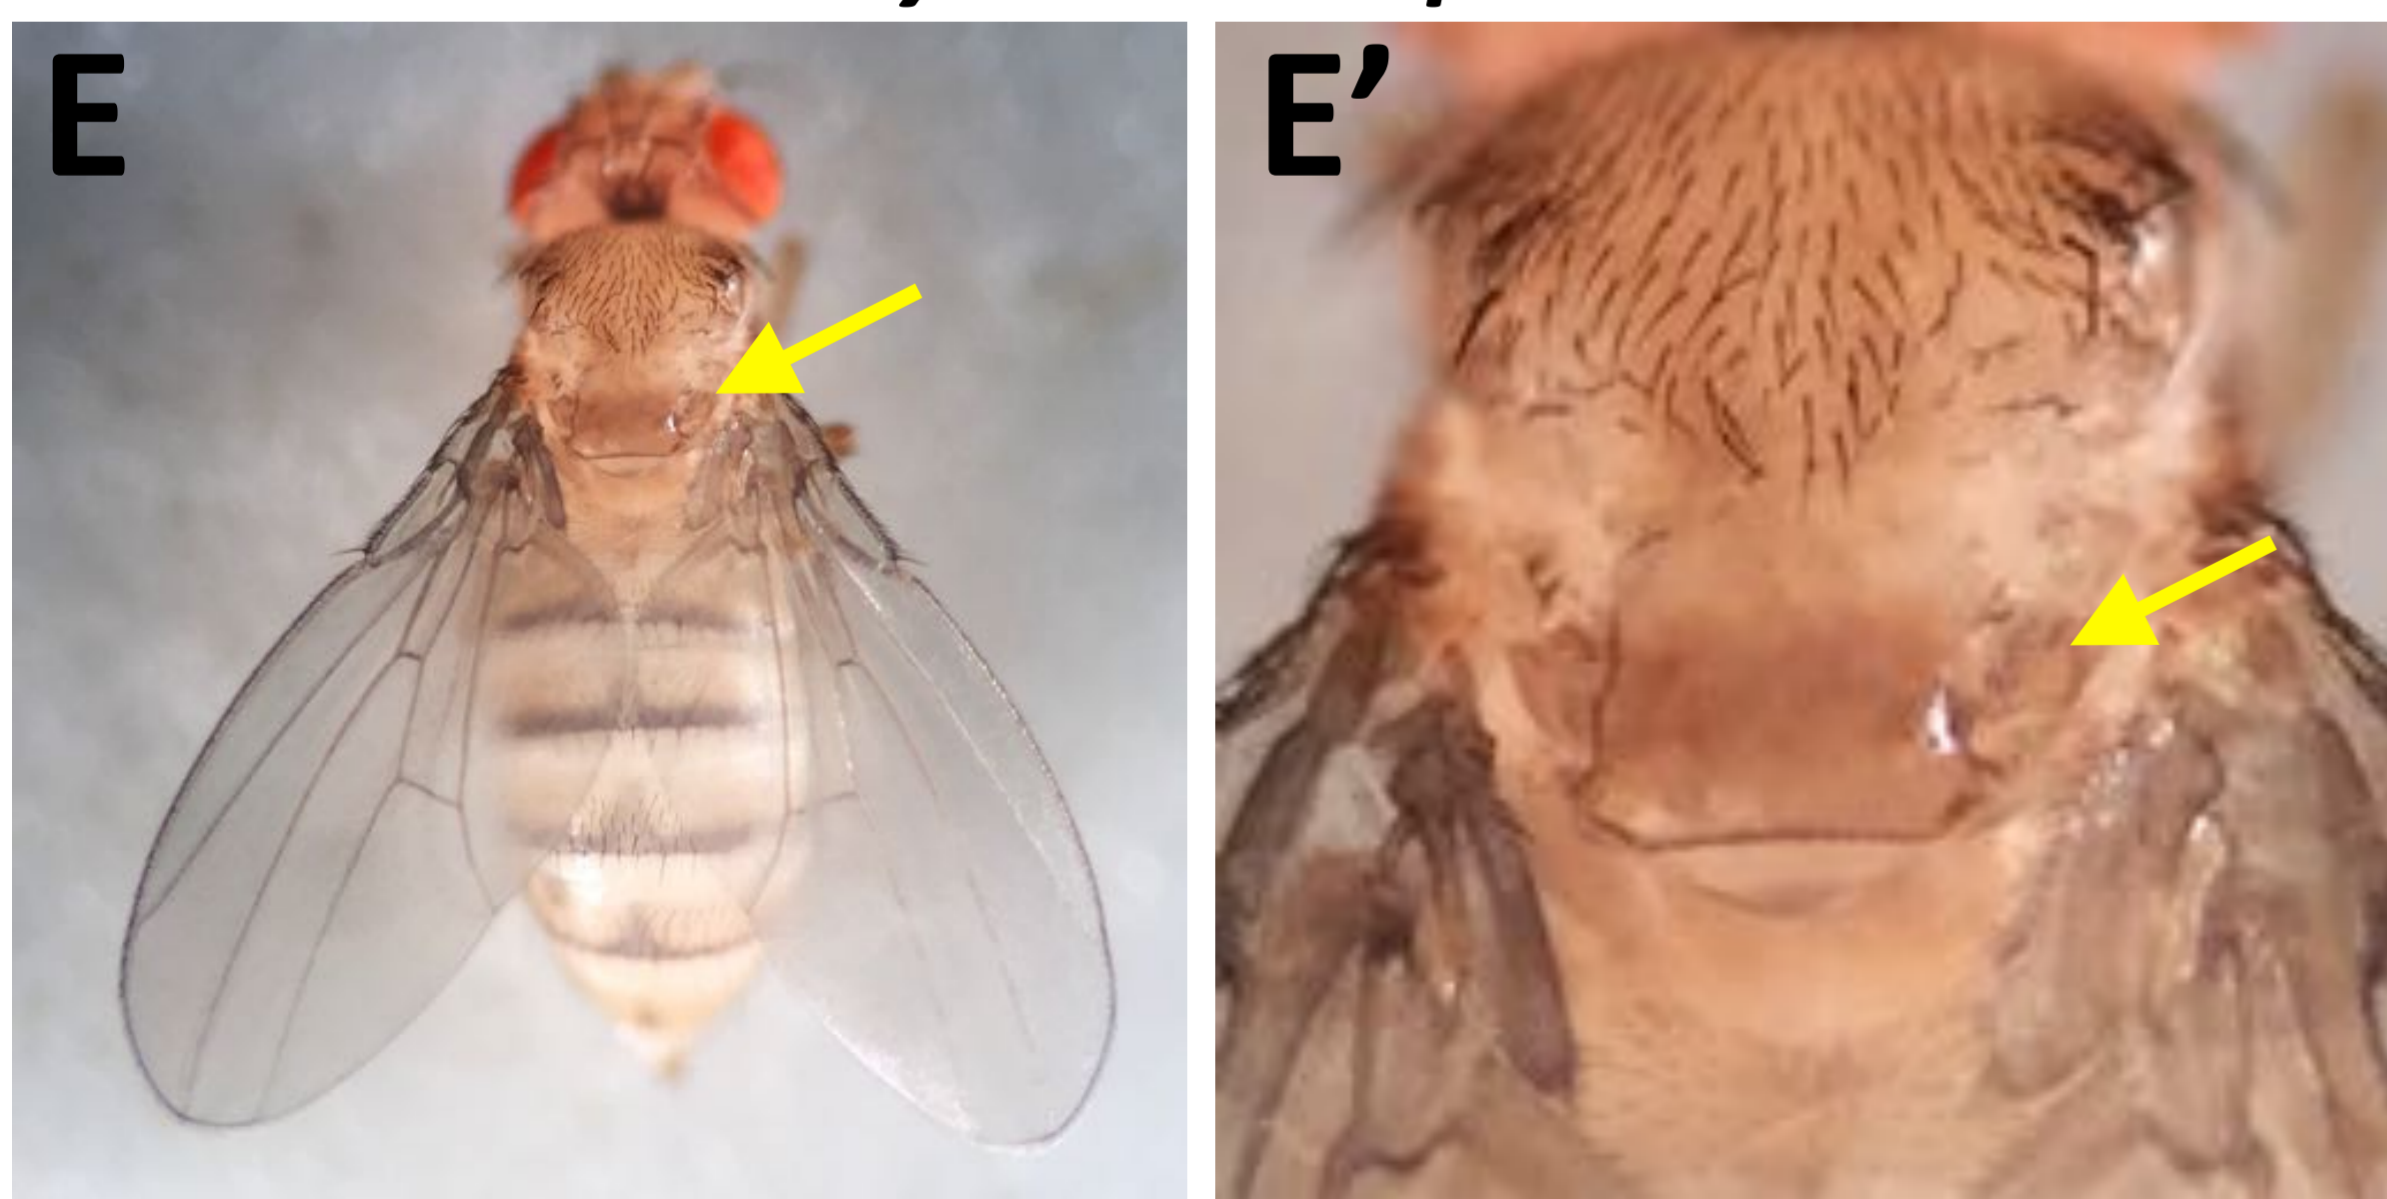

Supplement: supp [file elife-30391-supp-v1.zip]

*hs-FLP; AP-1-GFP; FRT82B RFP / FRT82B CtBP<sup>Q229\*</sup>*

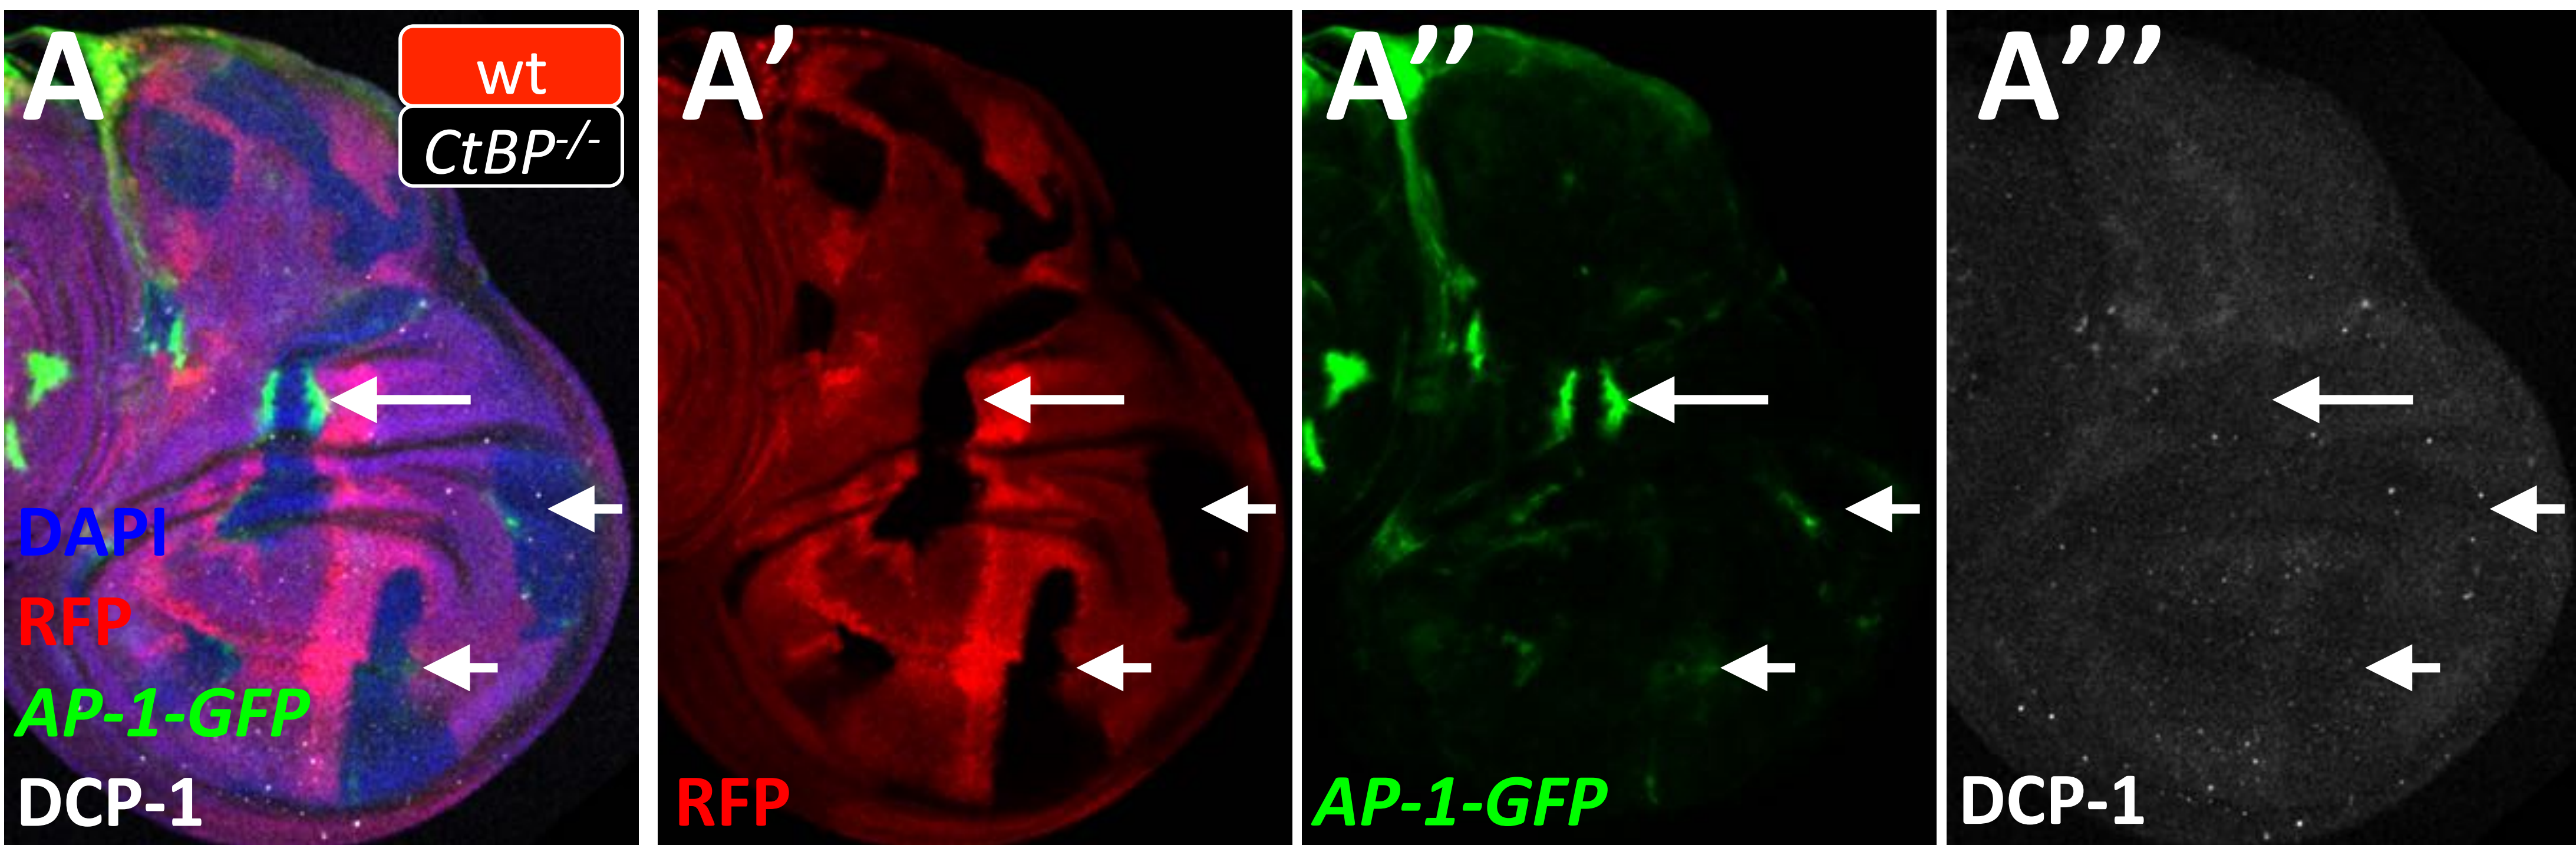

*hs-FLP; AP-1-GFP; FRT82B RFP / FRT82B CtBP<sup>Q229\*</sup>*

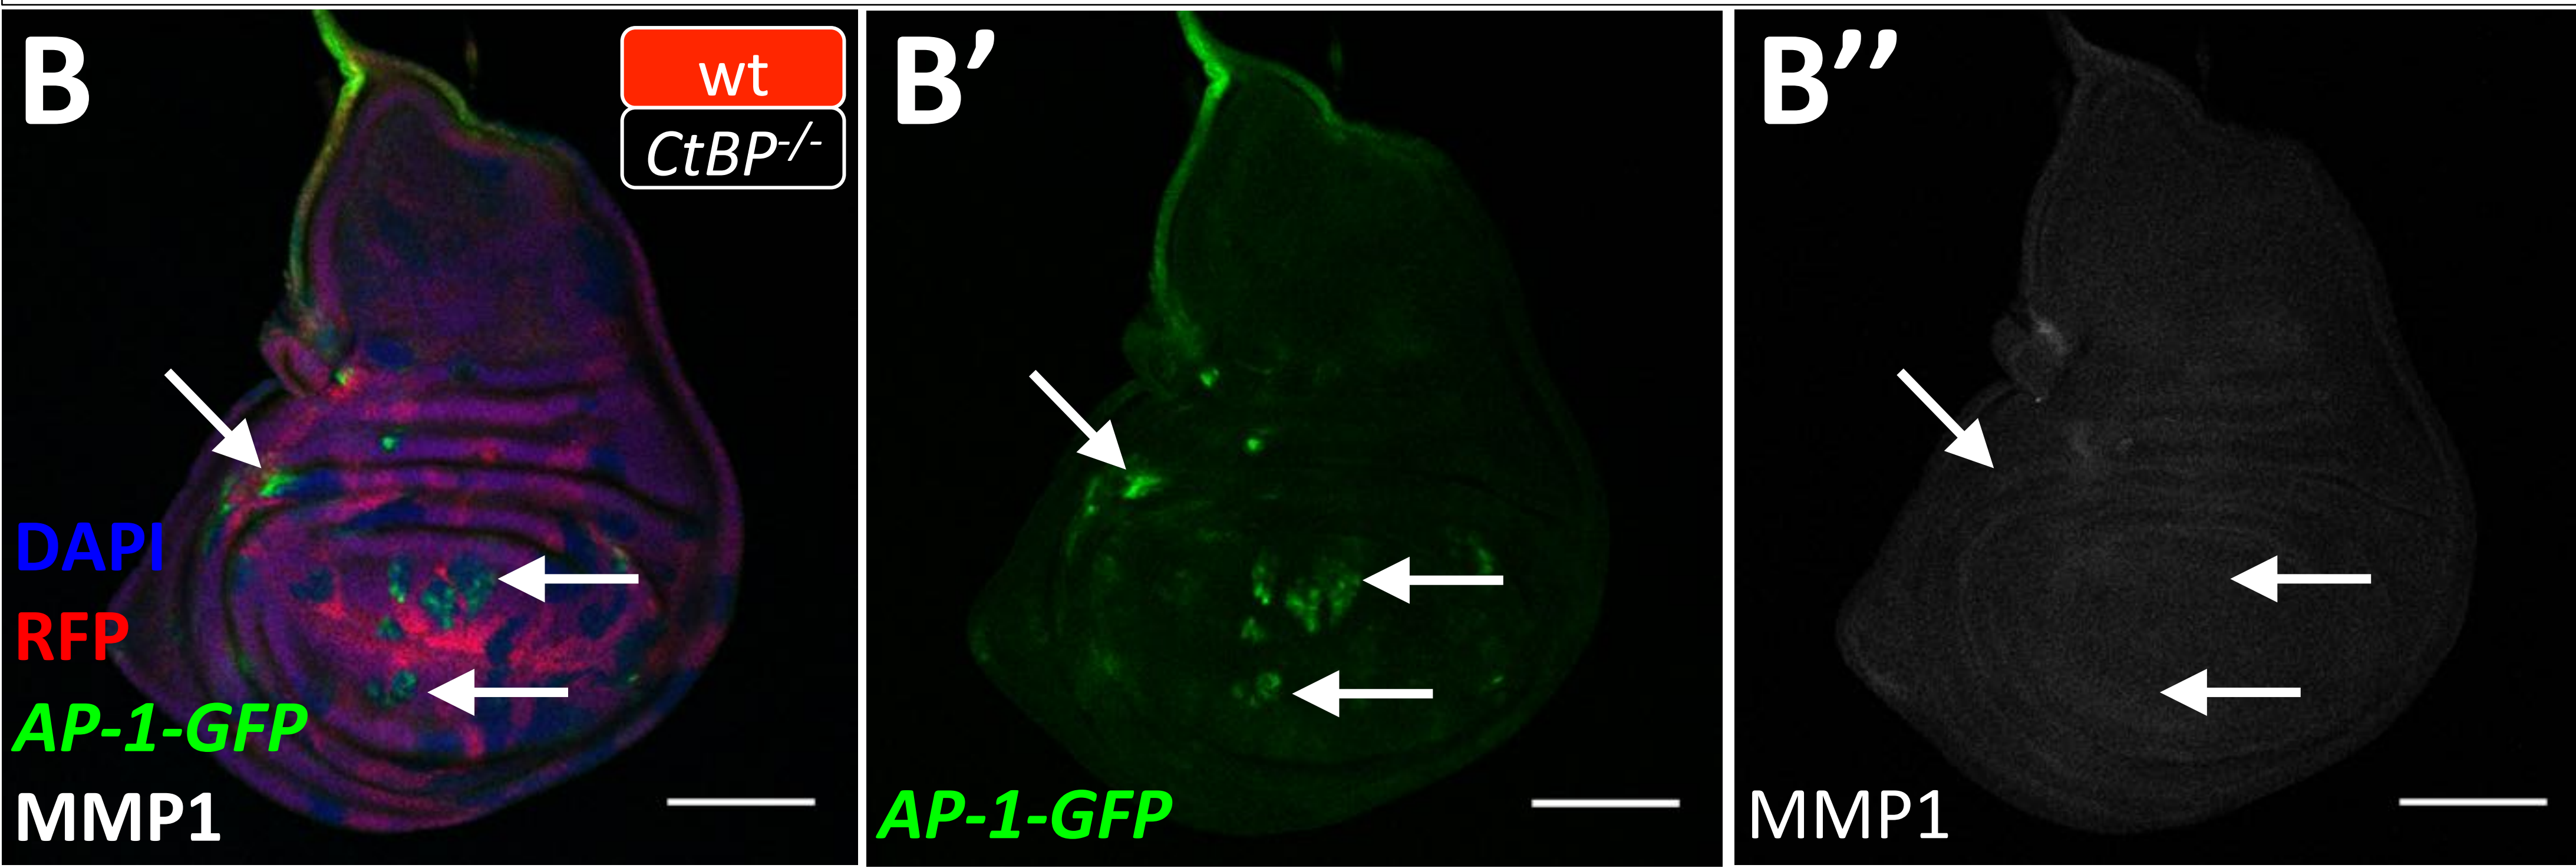

Supplement: supp [file elife-30391-supp-v1.zip]

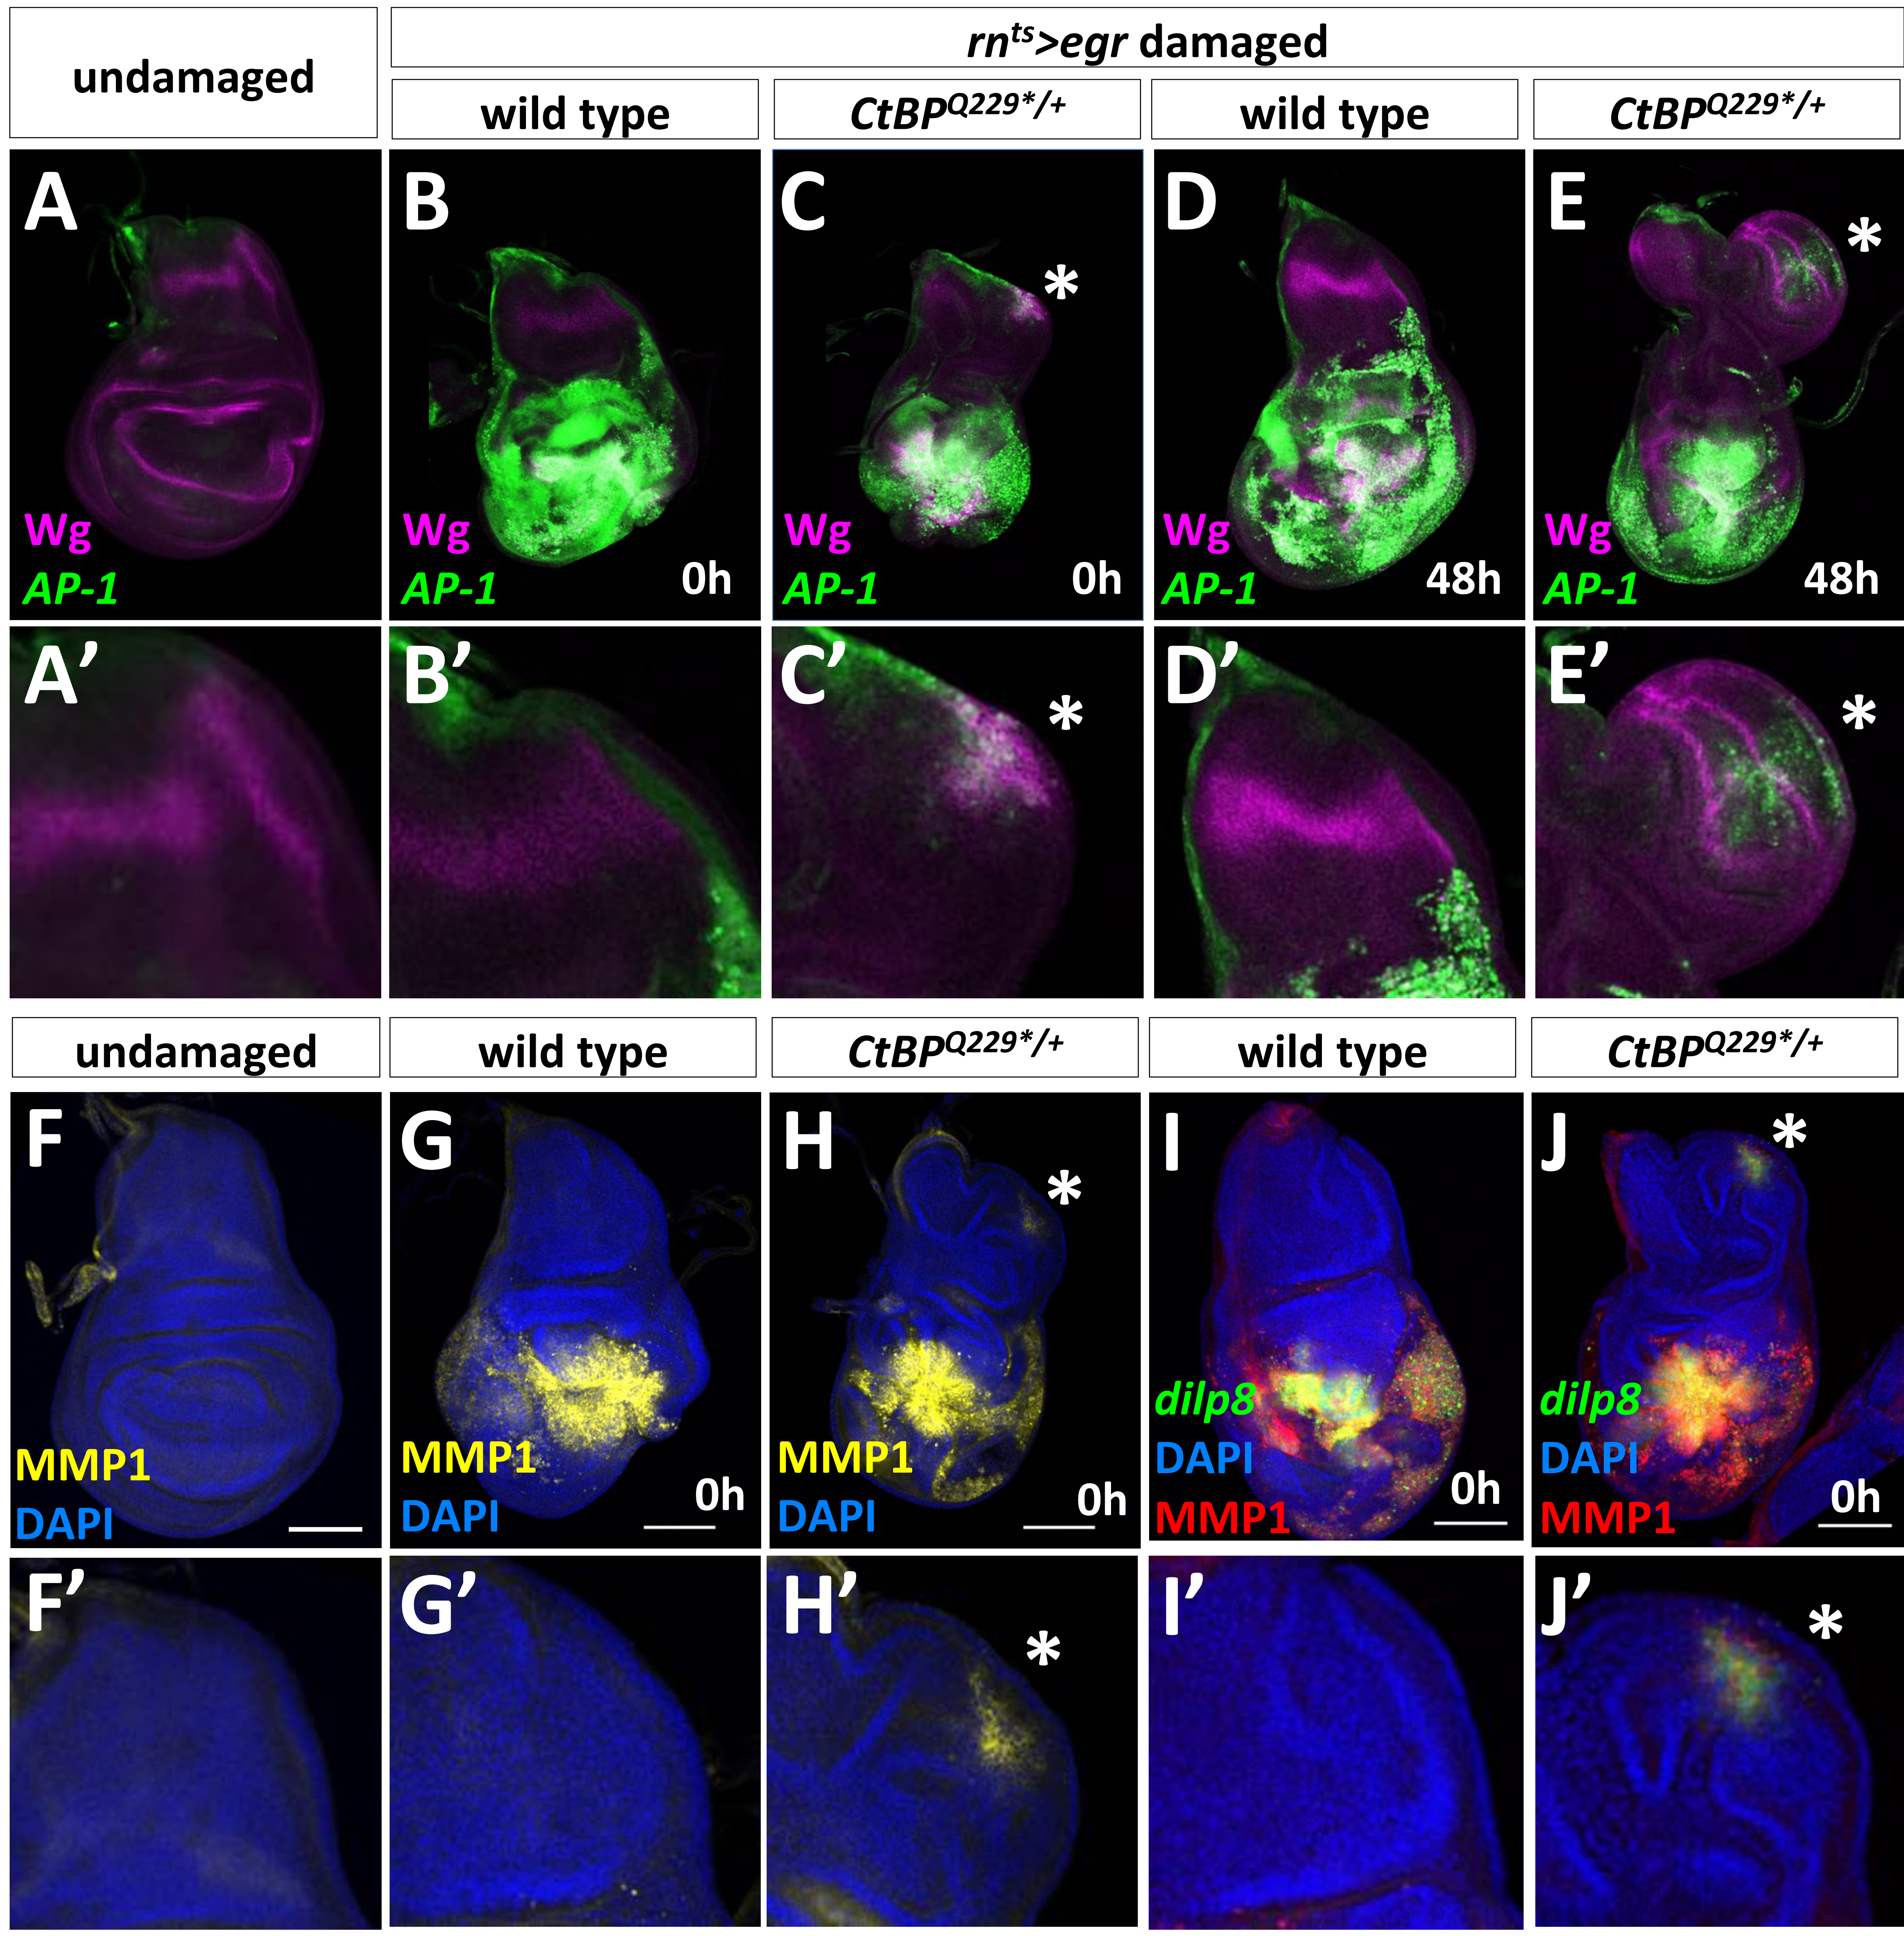

Supplement: supp [file elife-30391-supp-v1.zip]

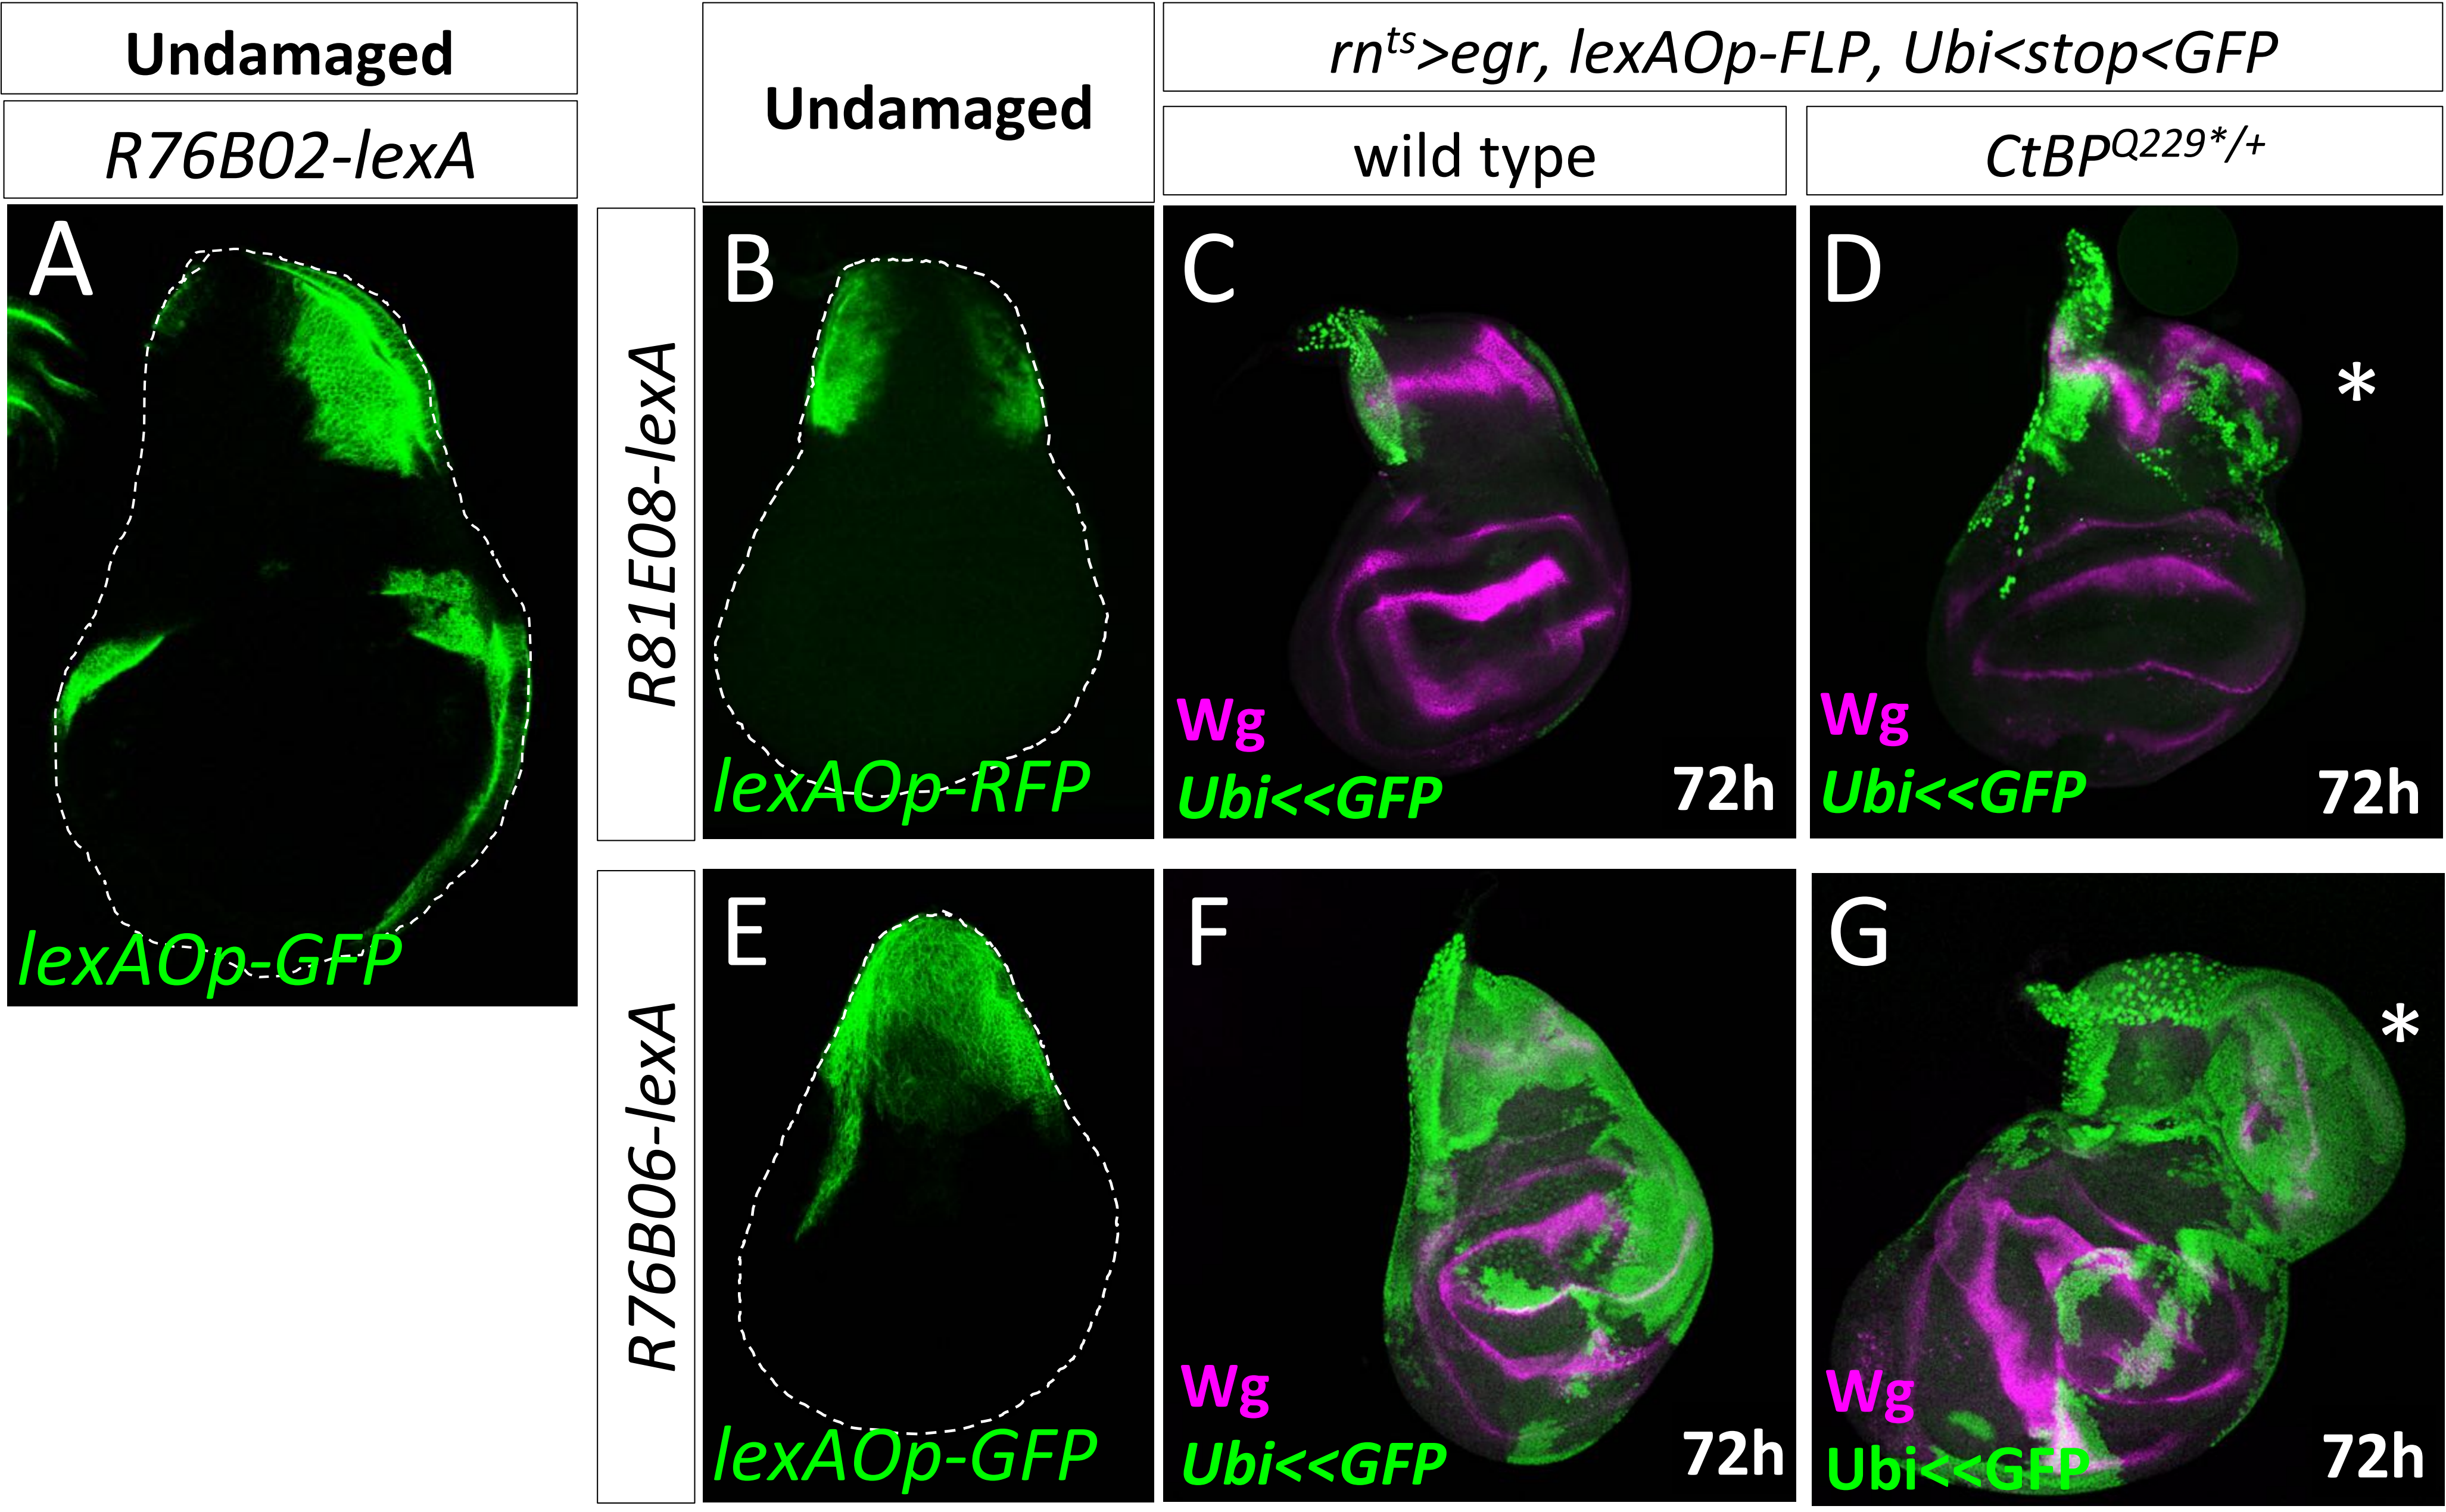

Supplement: supp [file elife-30391-supp-v1.zip]

control

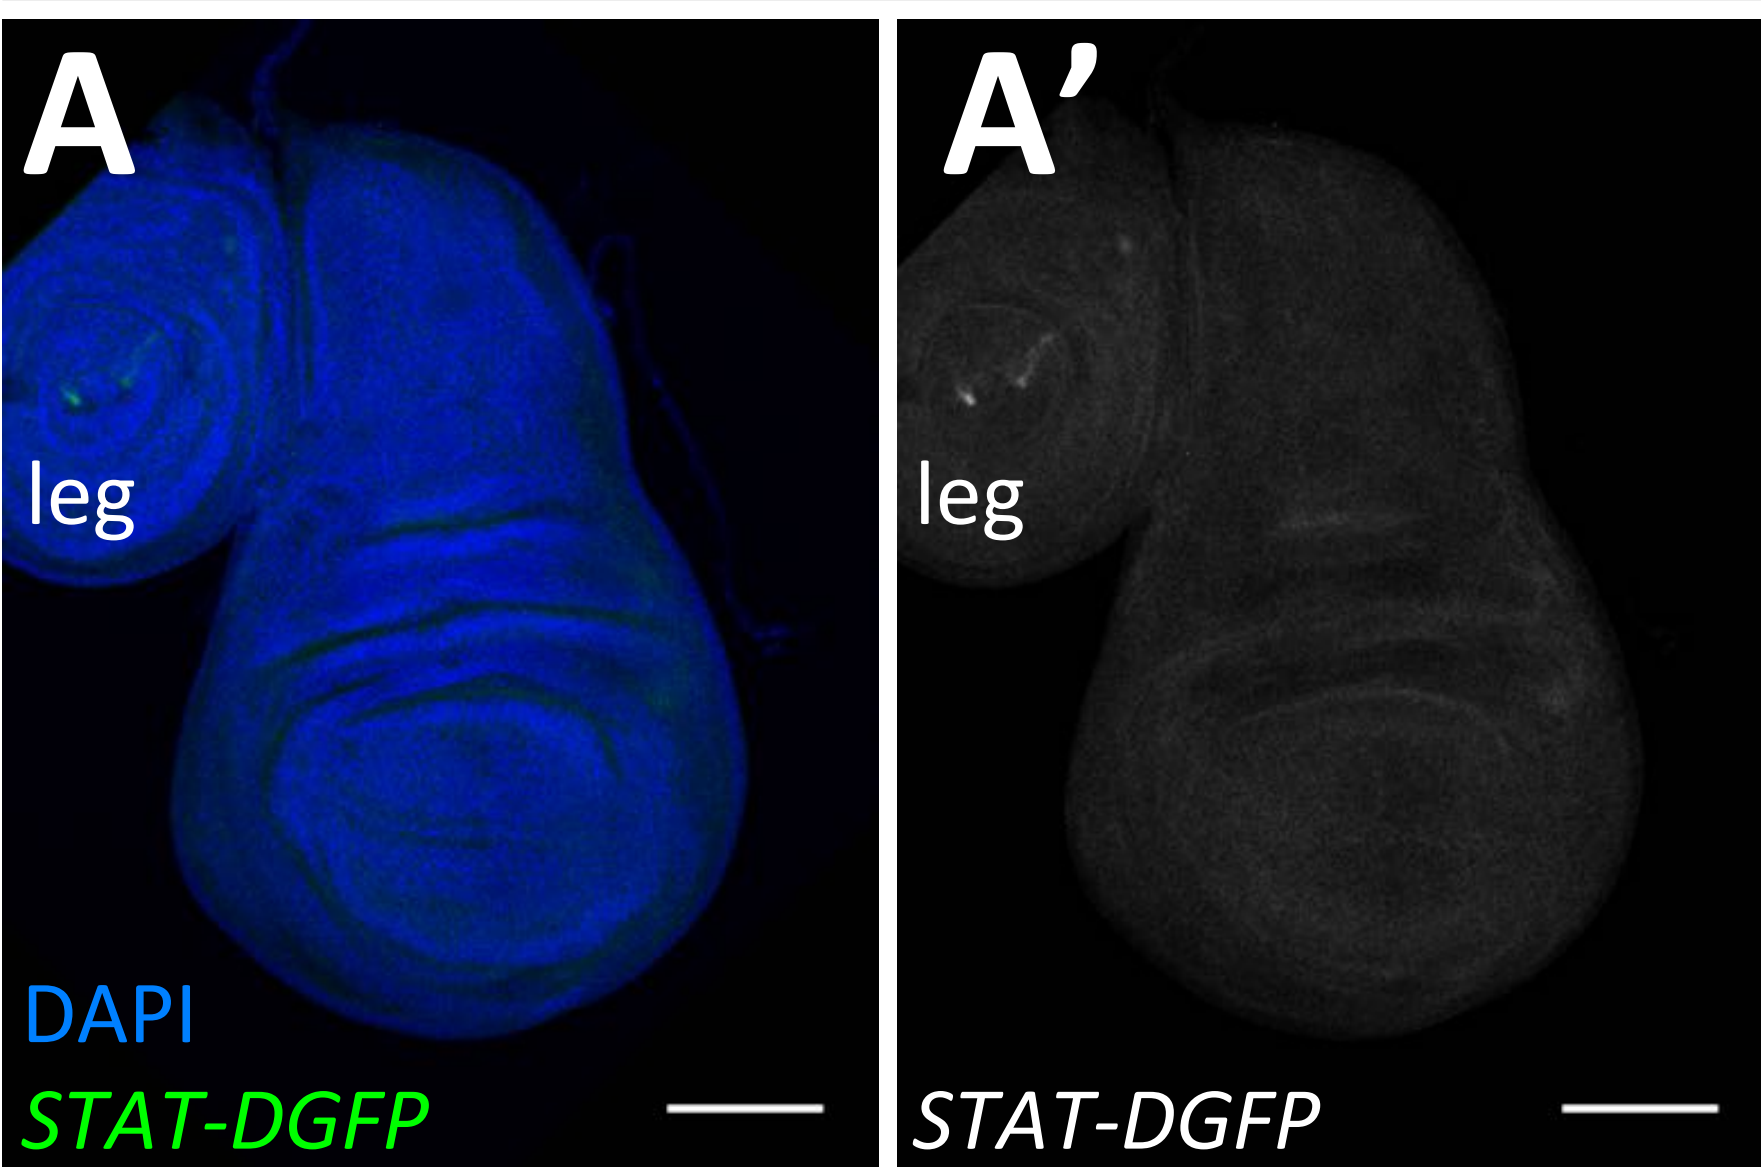

*dpp>upd1*

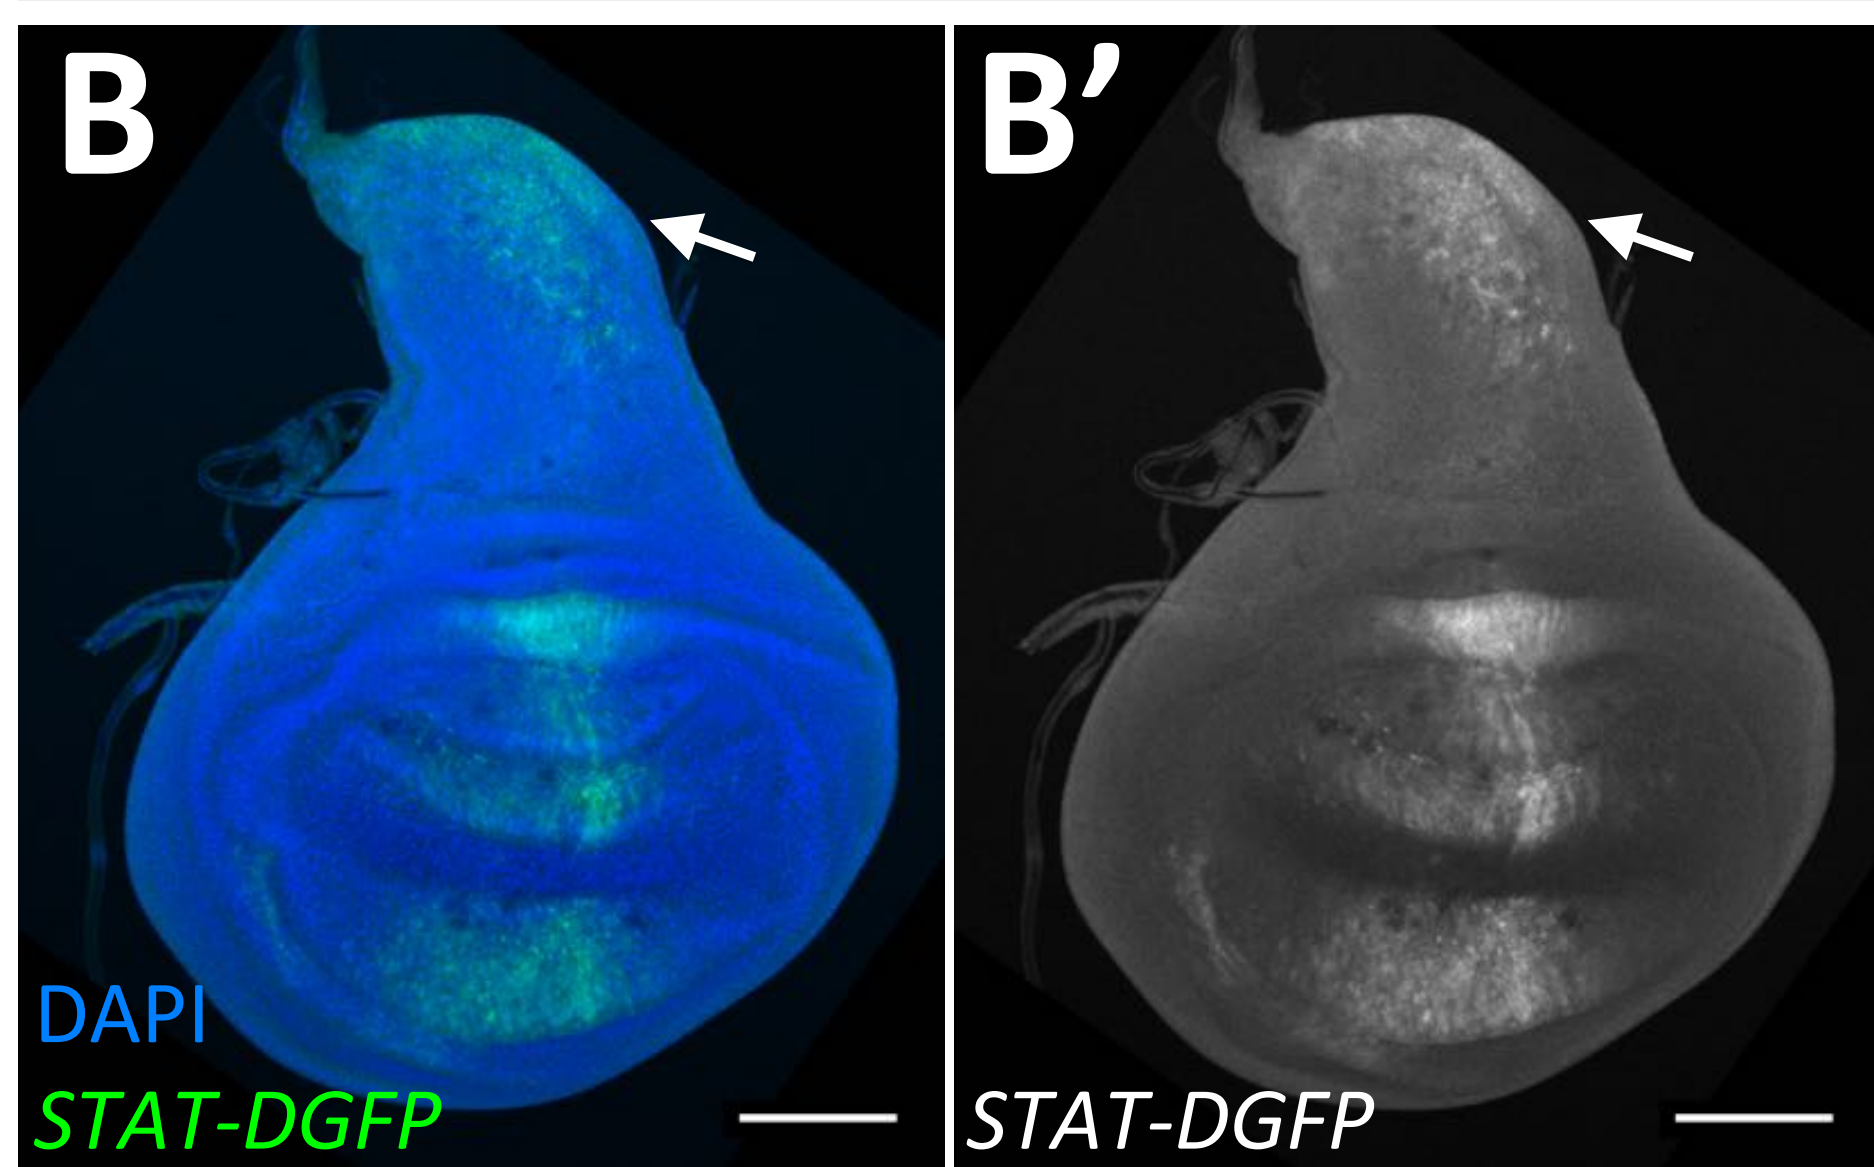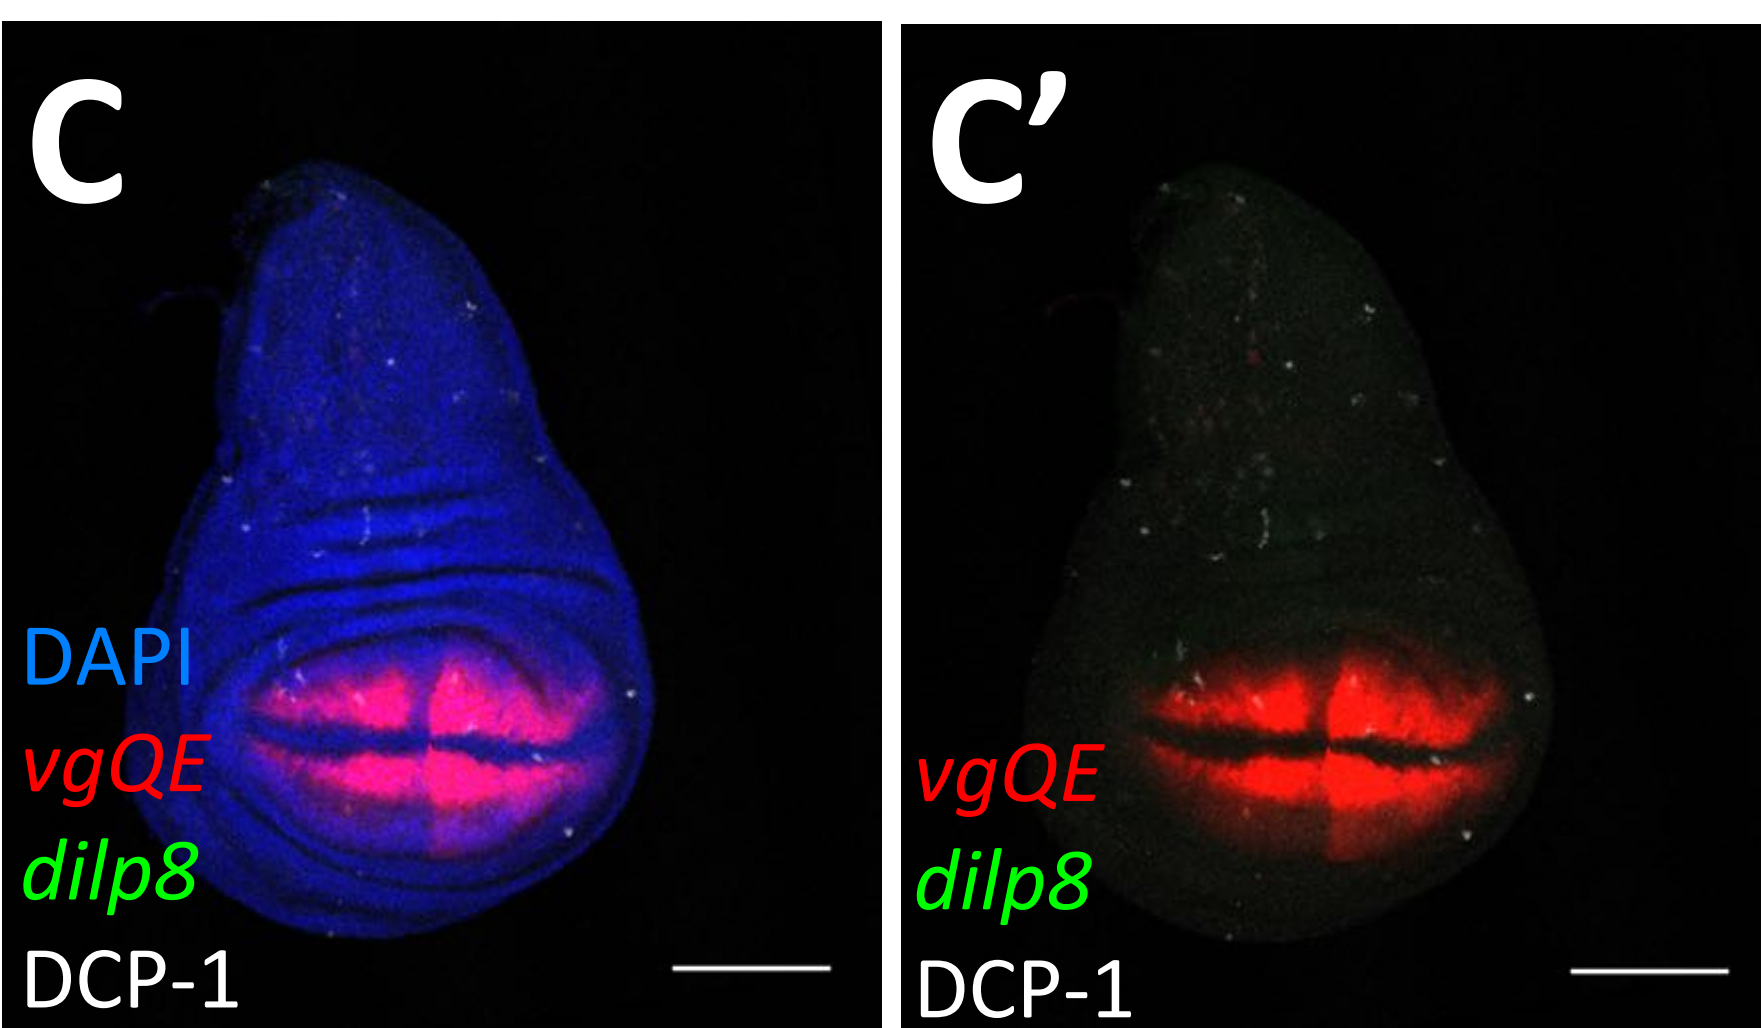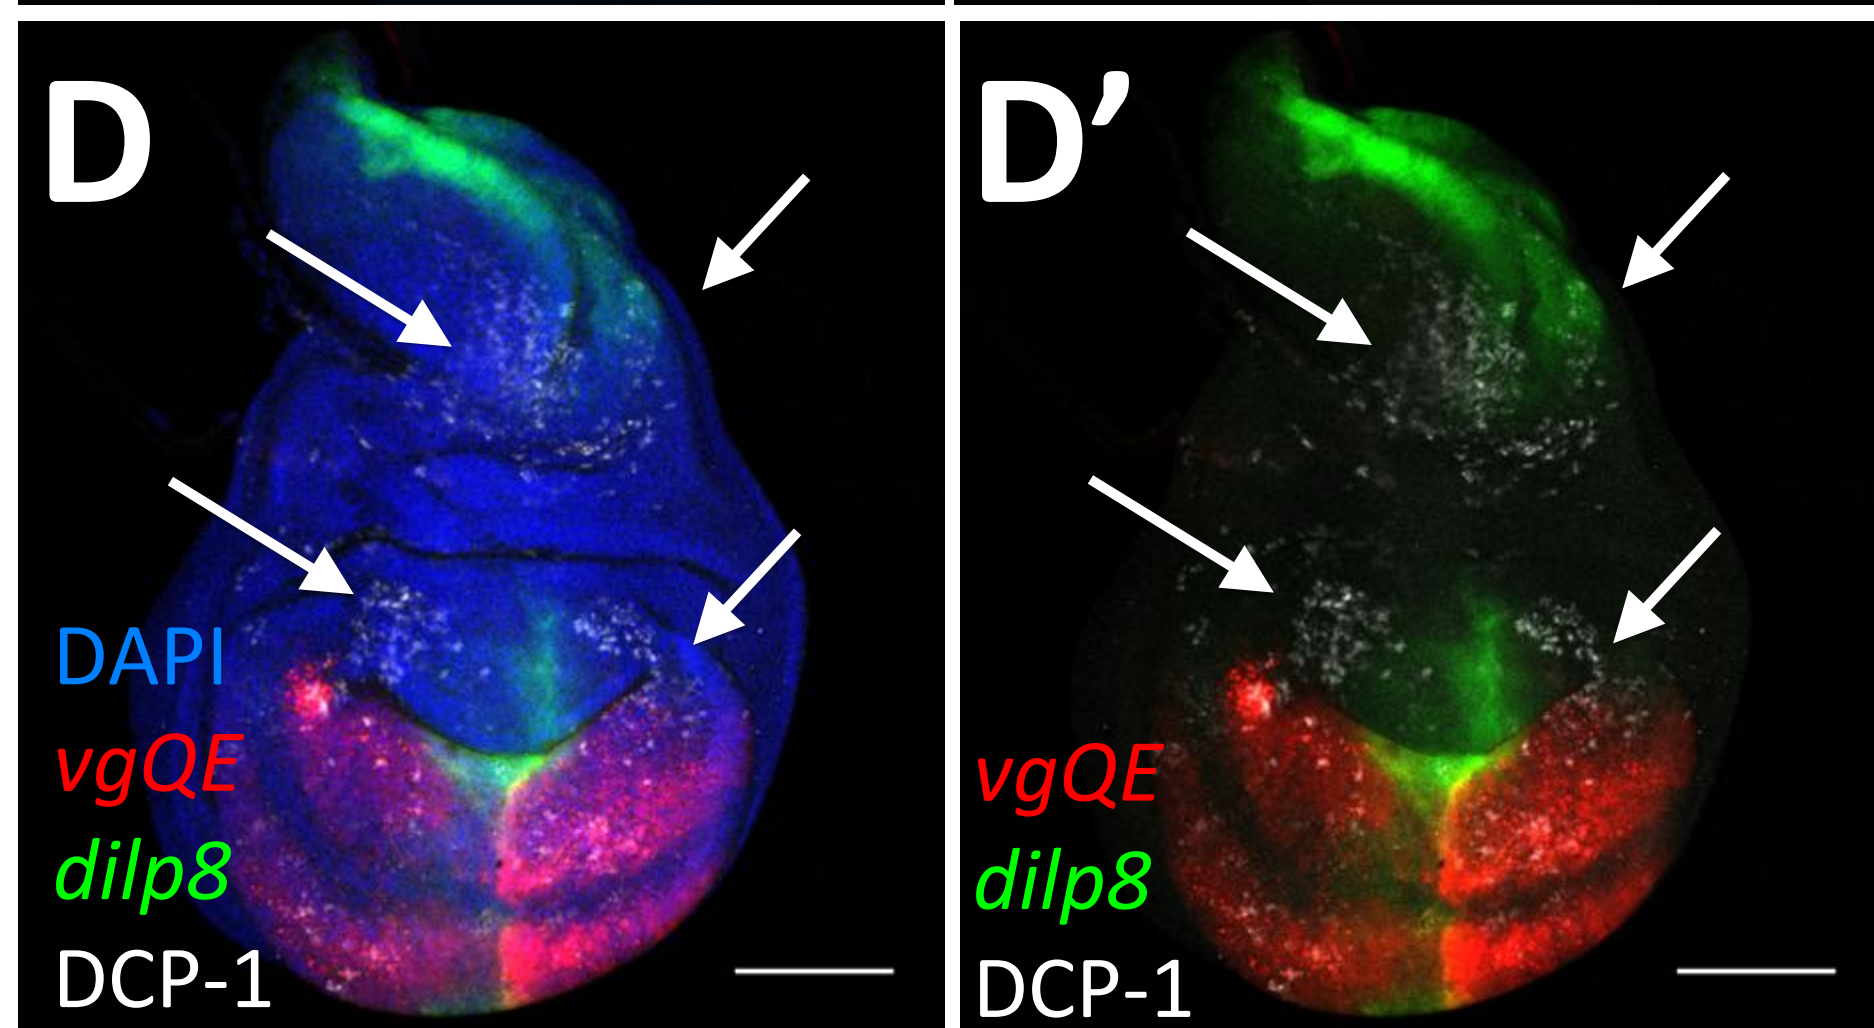

*dpp>upd1*

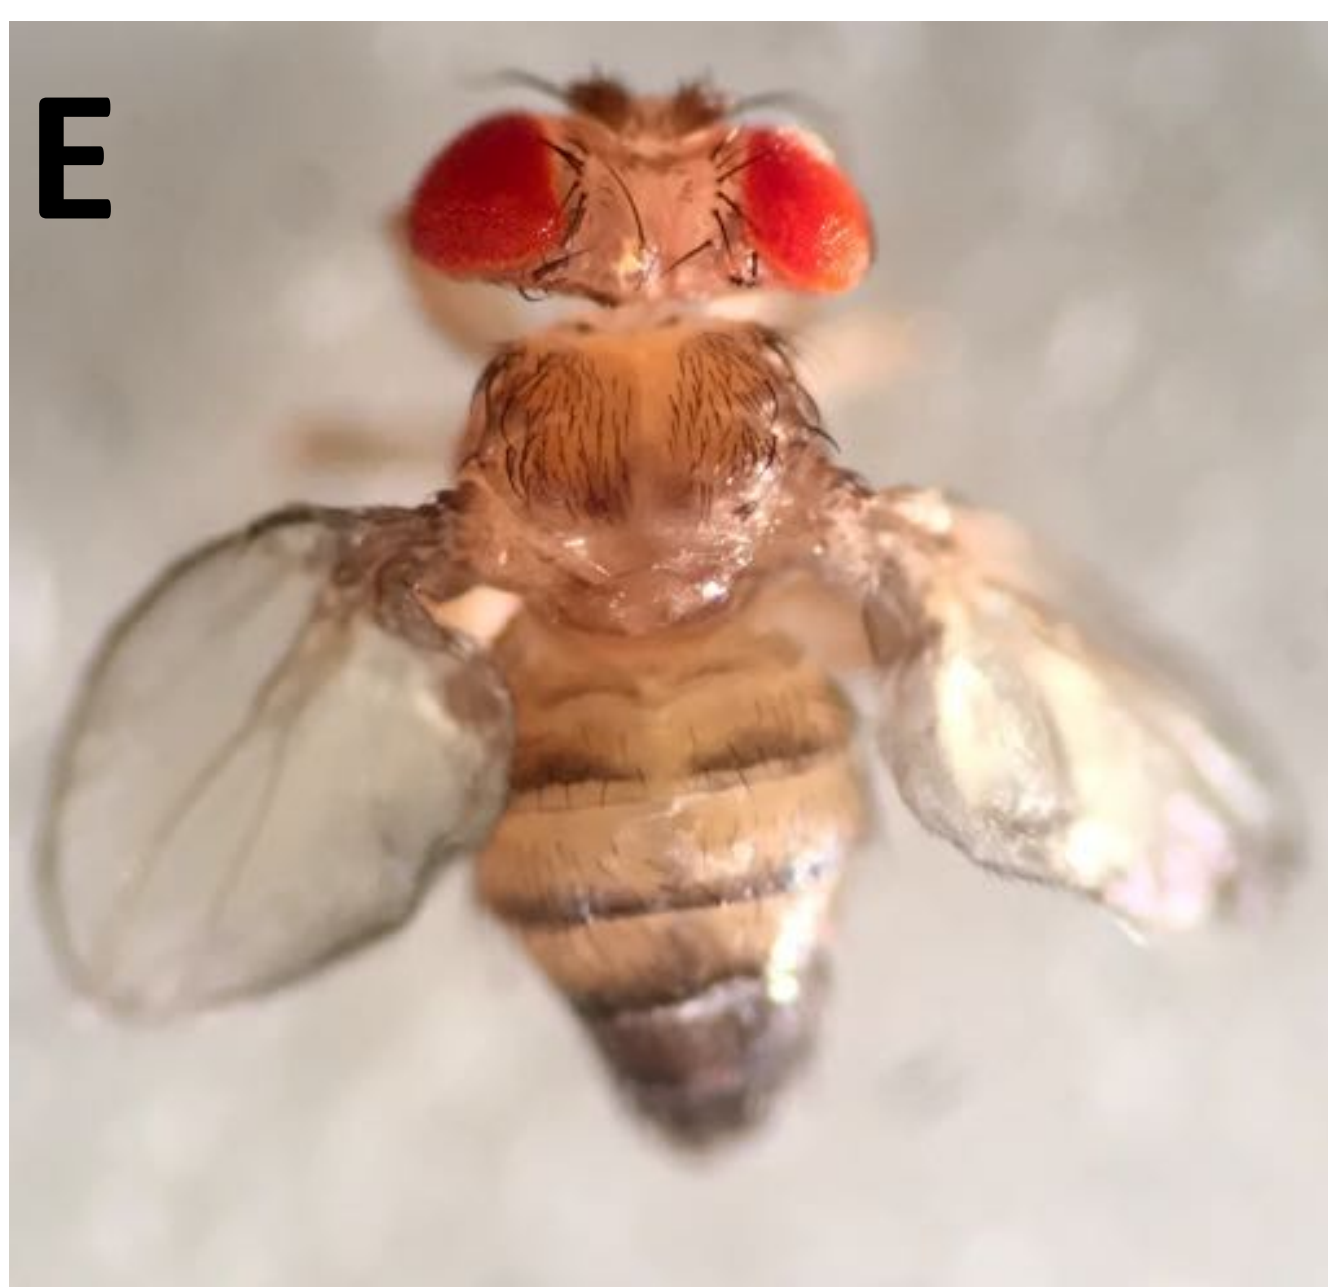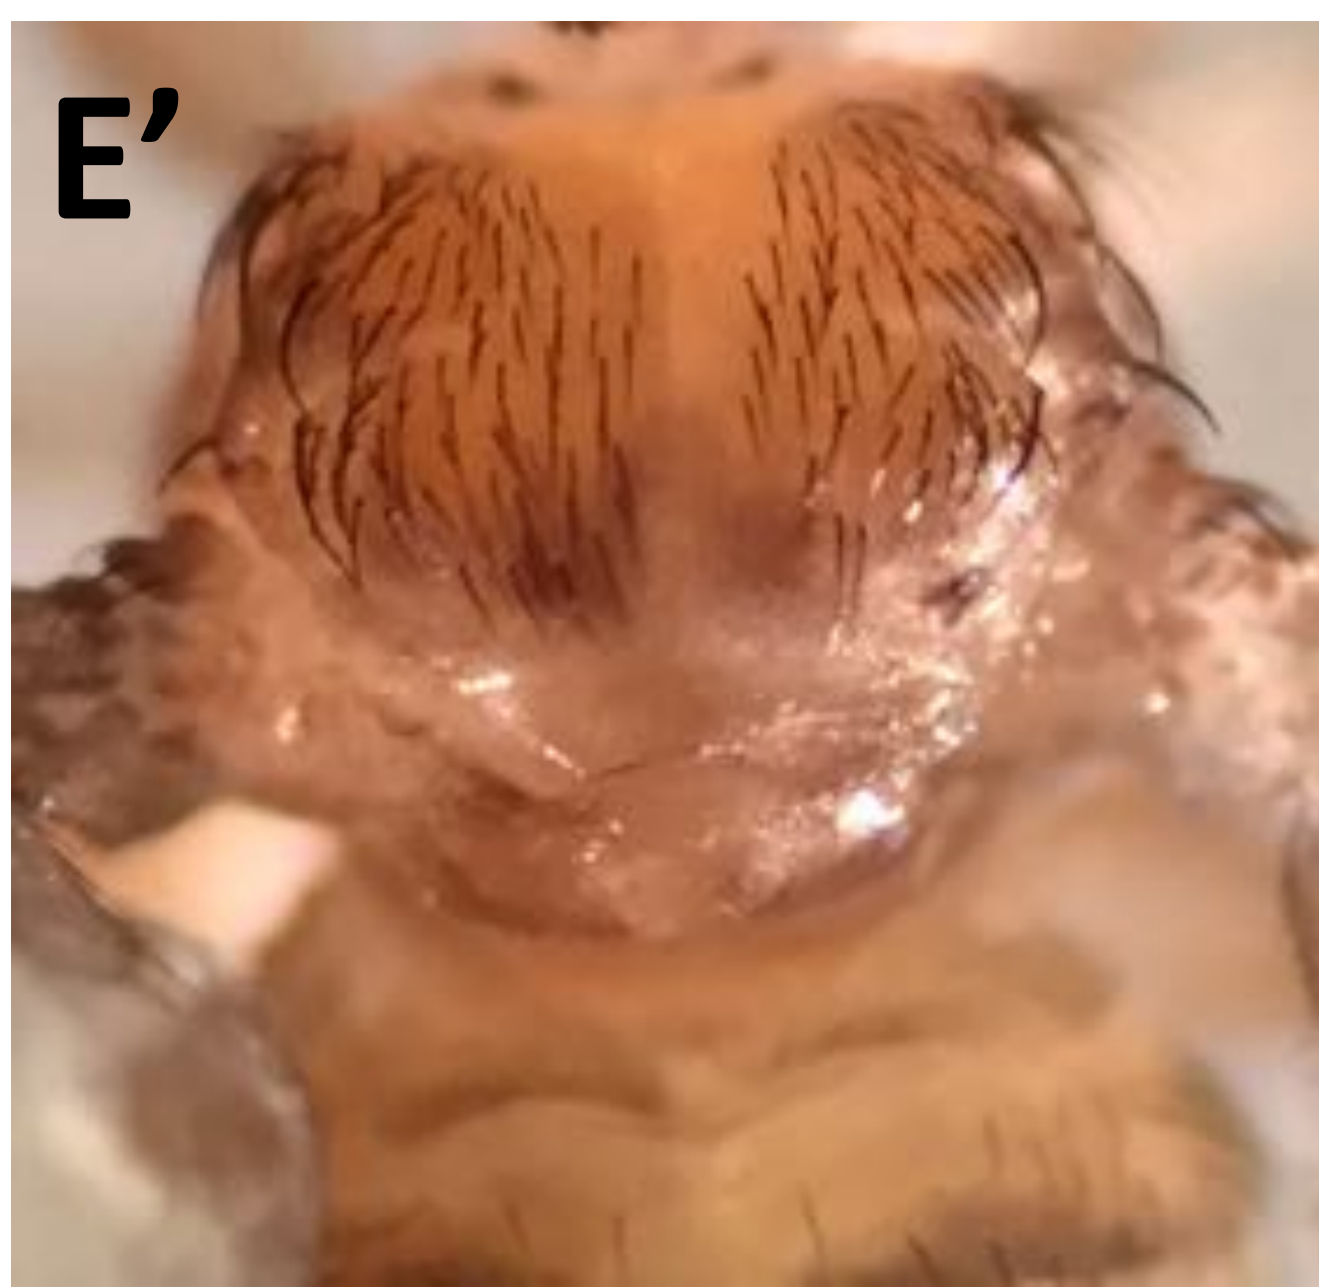

Supplement: supp [file elife-30391-supp-v1.zip]

**A**

*ptc<sup>ts</sup>>wg*

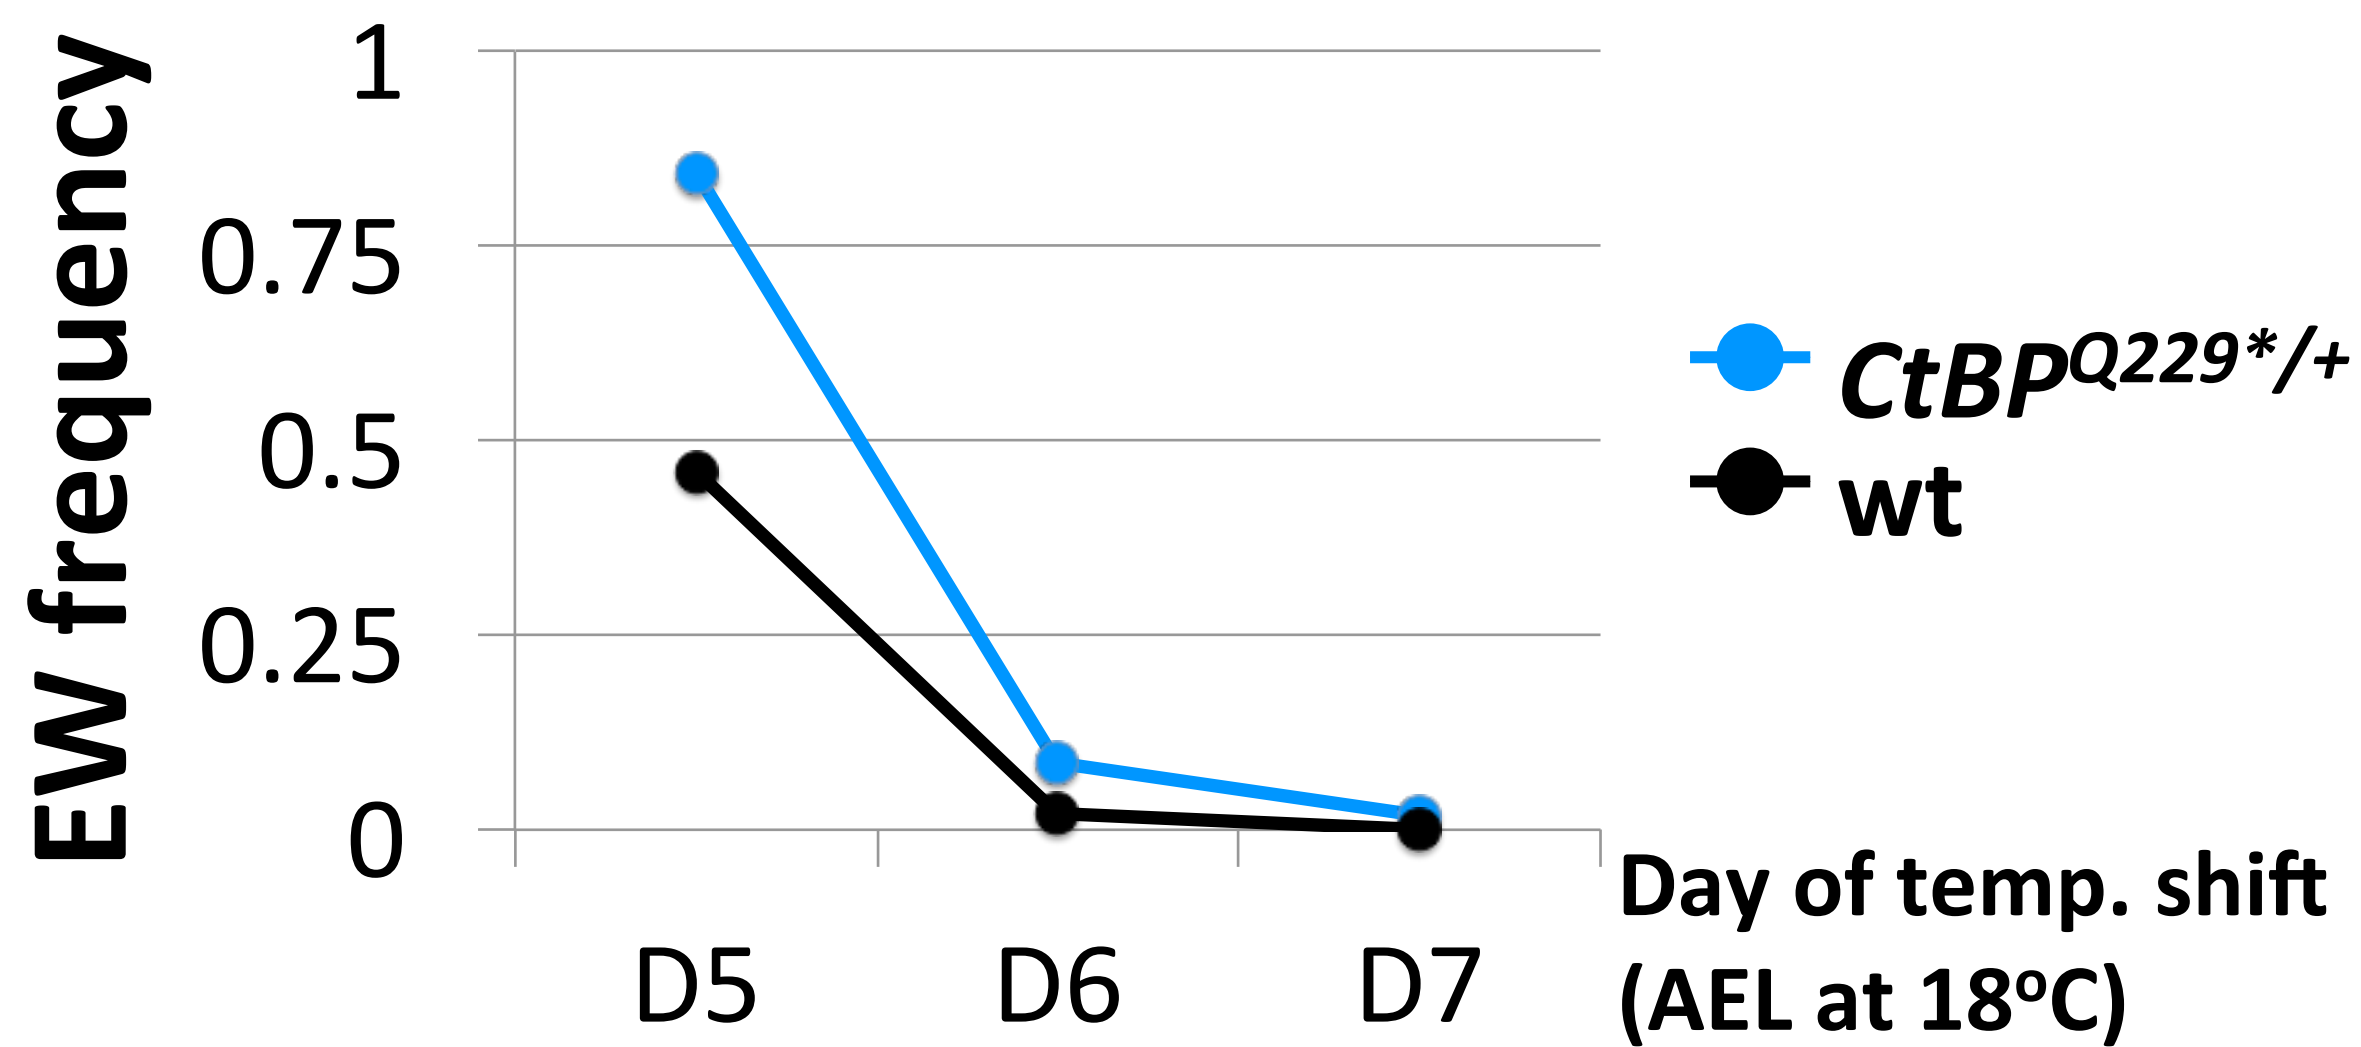

|     |     |     |          |
|-----|-----|-----|----------|
| 90  | 114 | 252 | # adults |
| 111 | 191 | 245 | scored   |

control

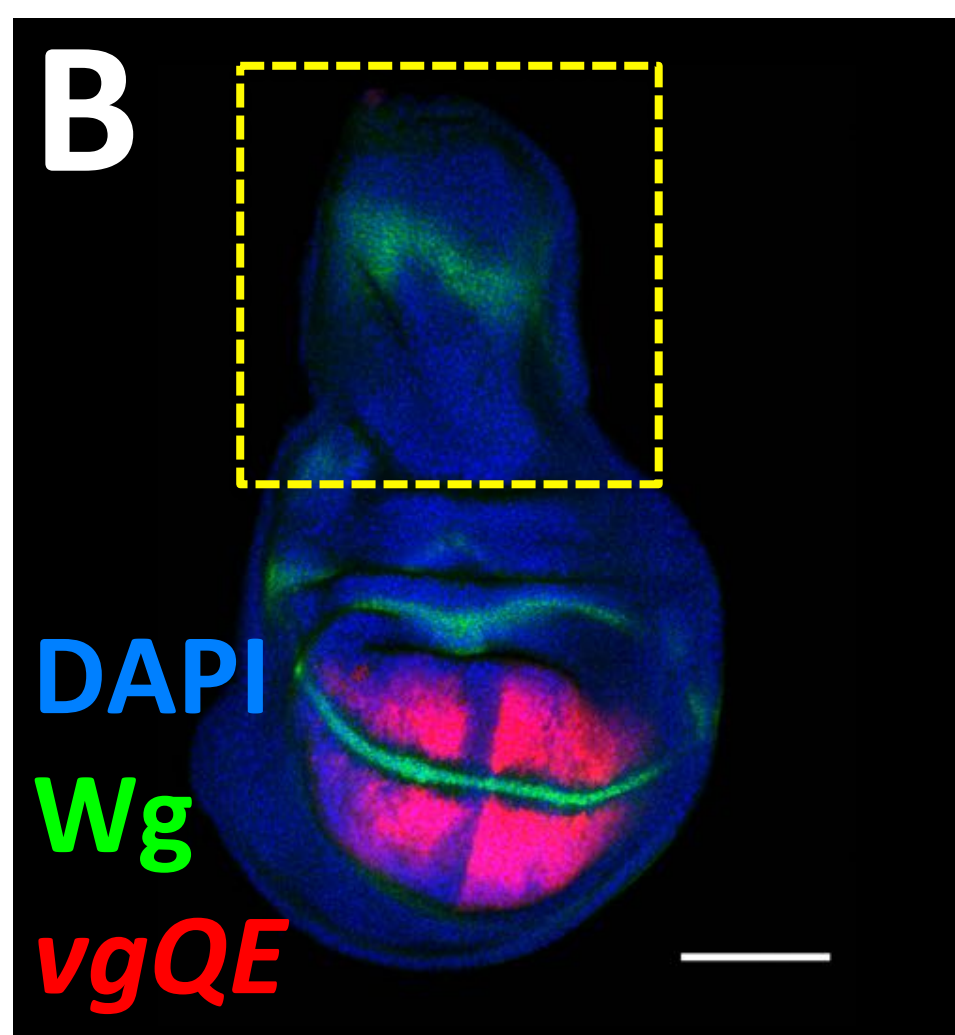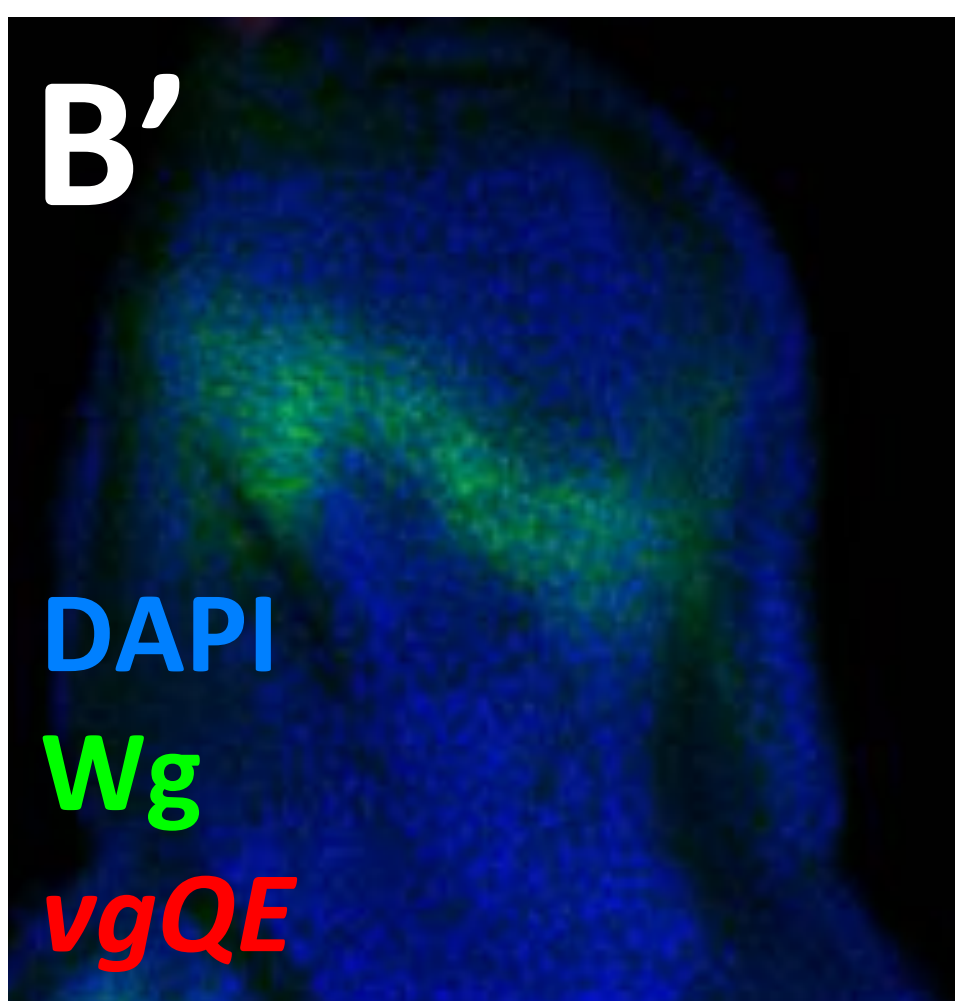

*ptc<sup>ts</sup>>wg CtBP<sup>Q229\*/+</sup>*

Day 5, 40h

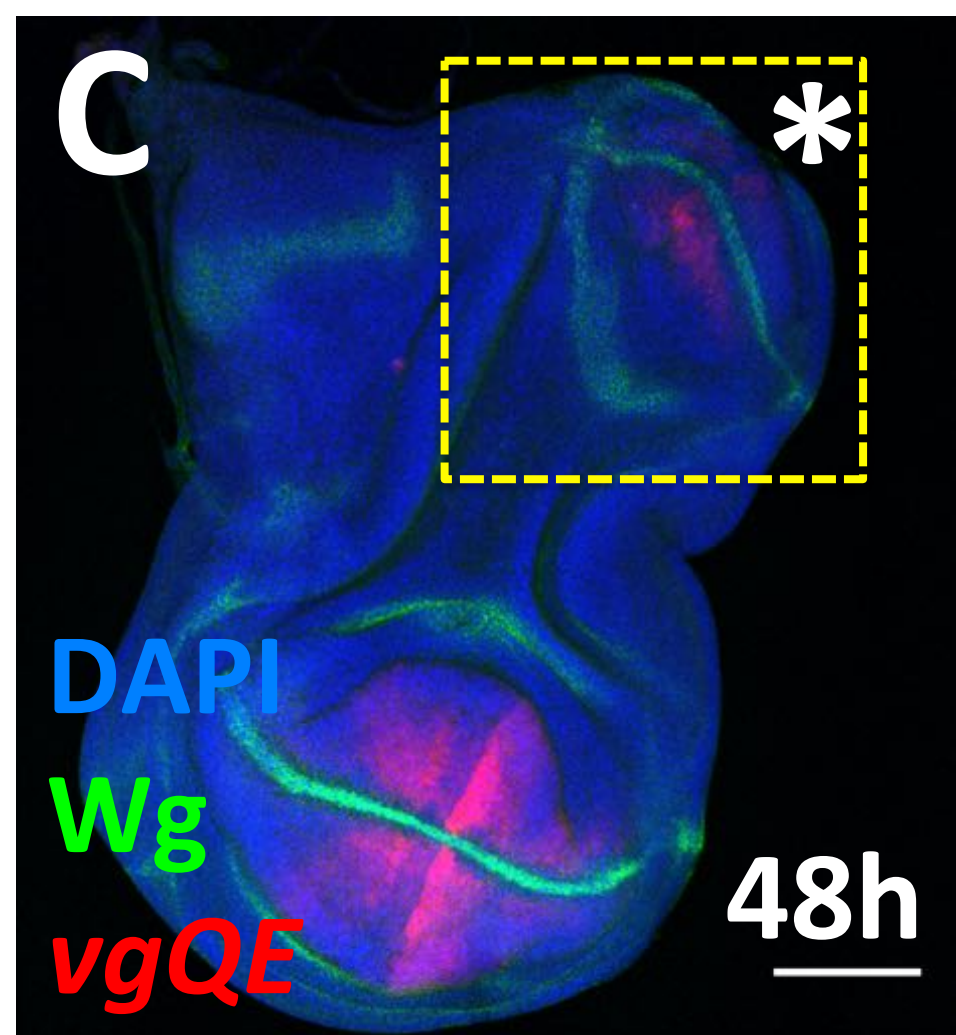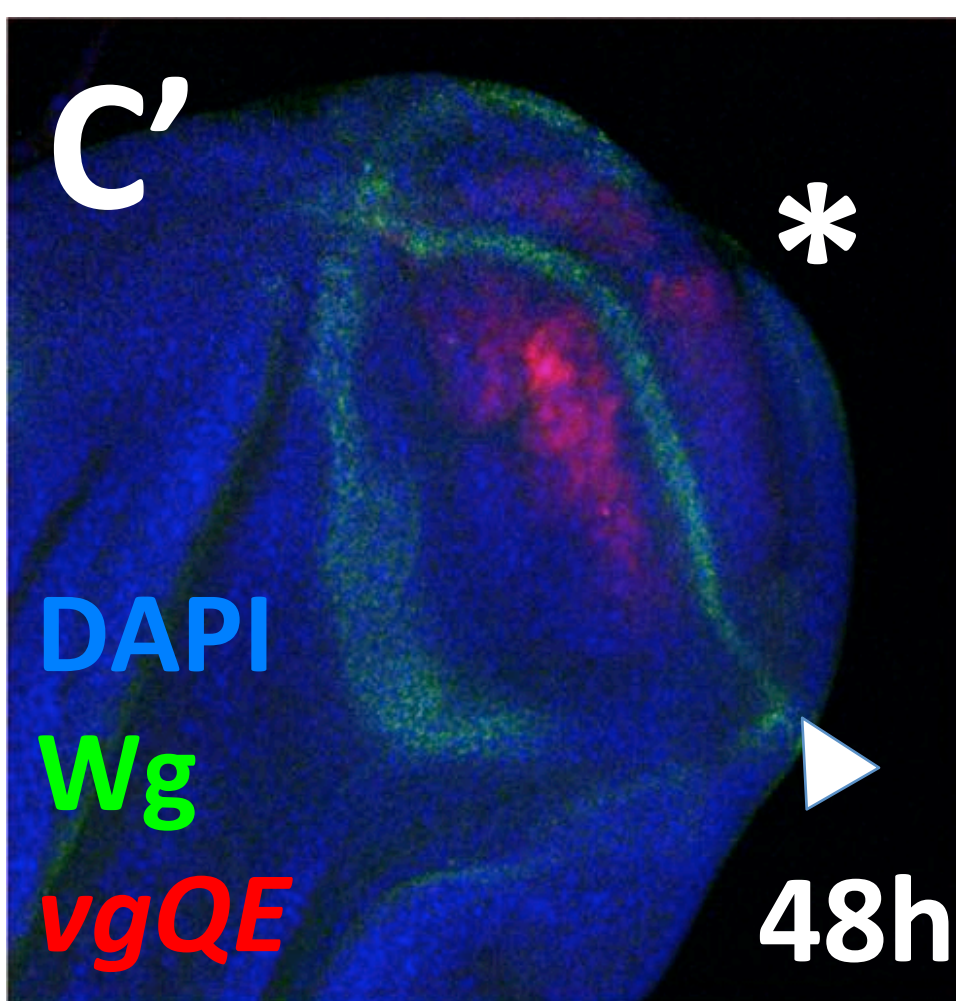

Day 7, 40h

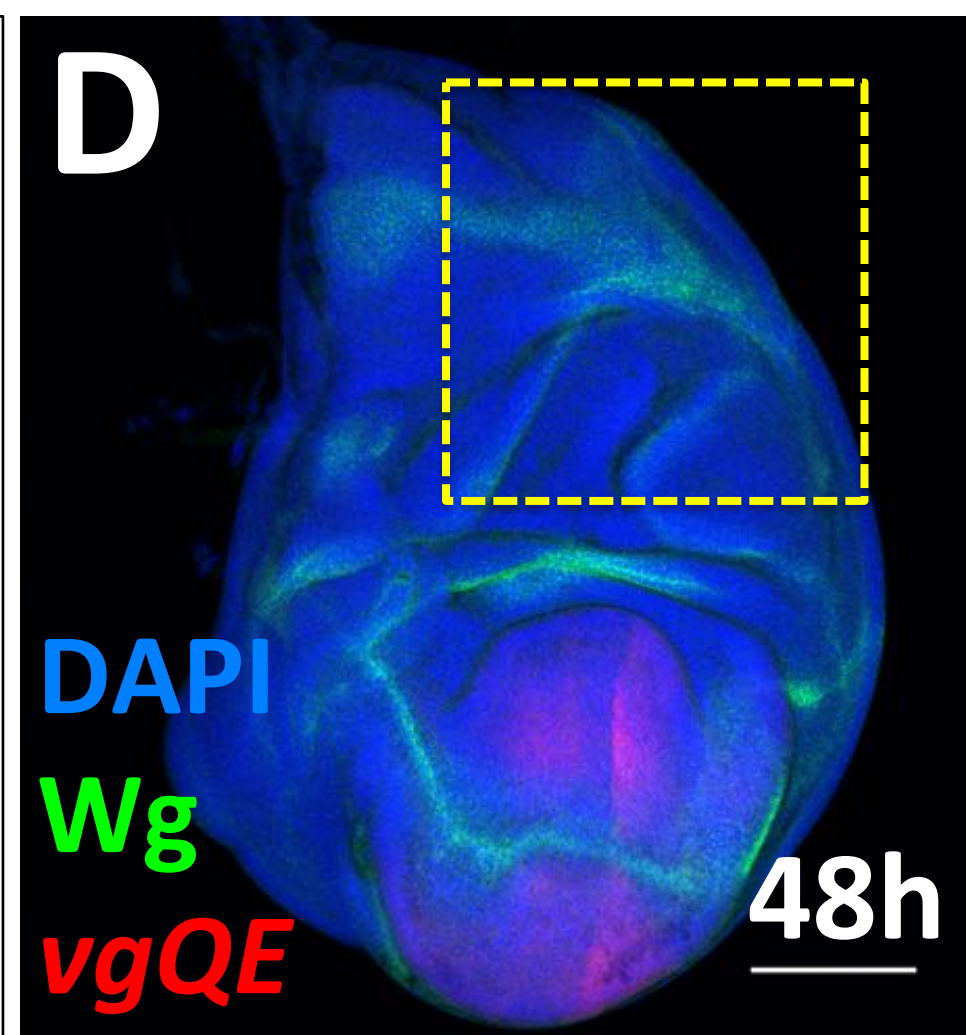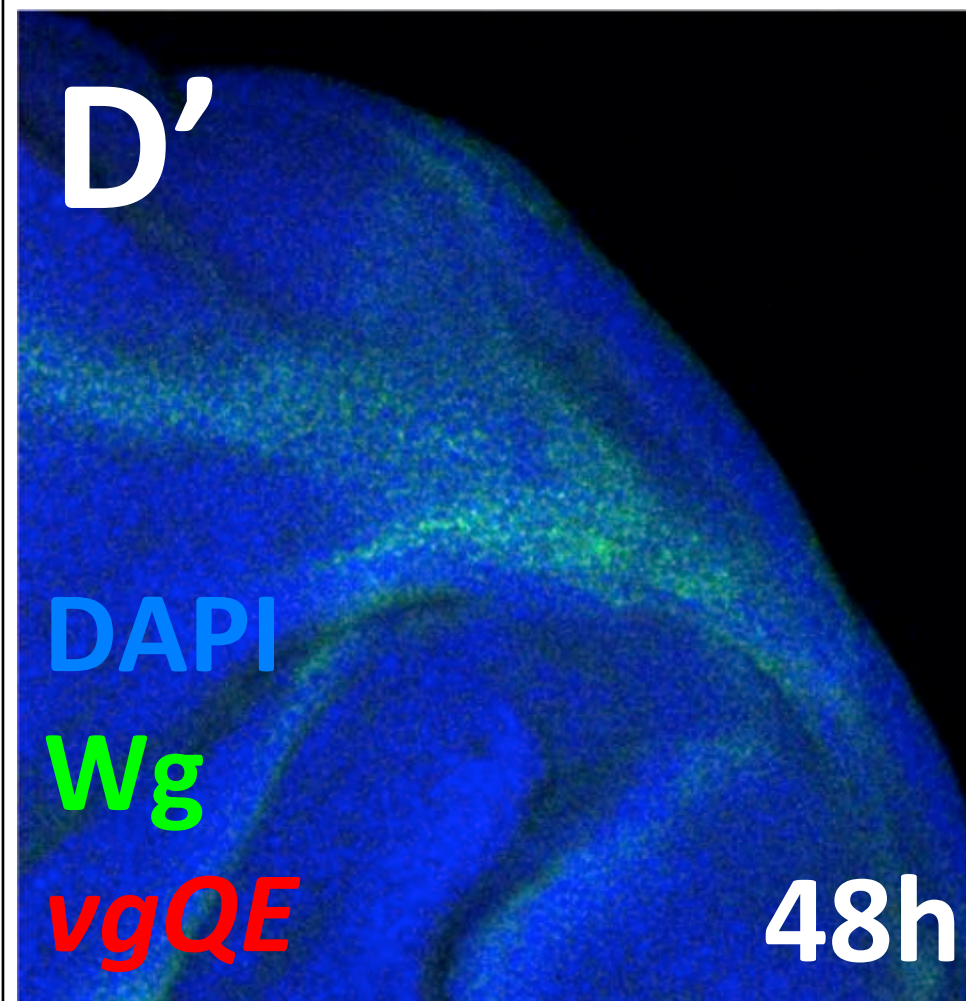

Supplement: supp [file elife-30391-supp-v1.zip]

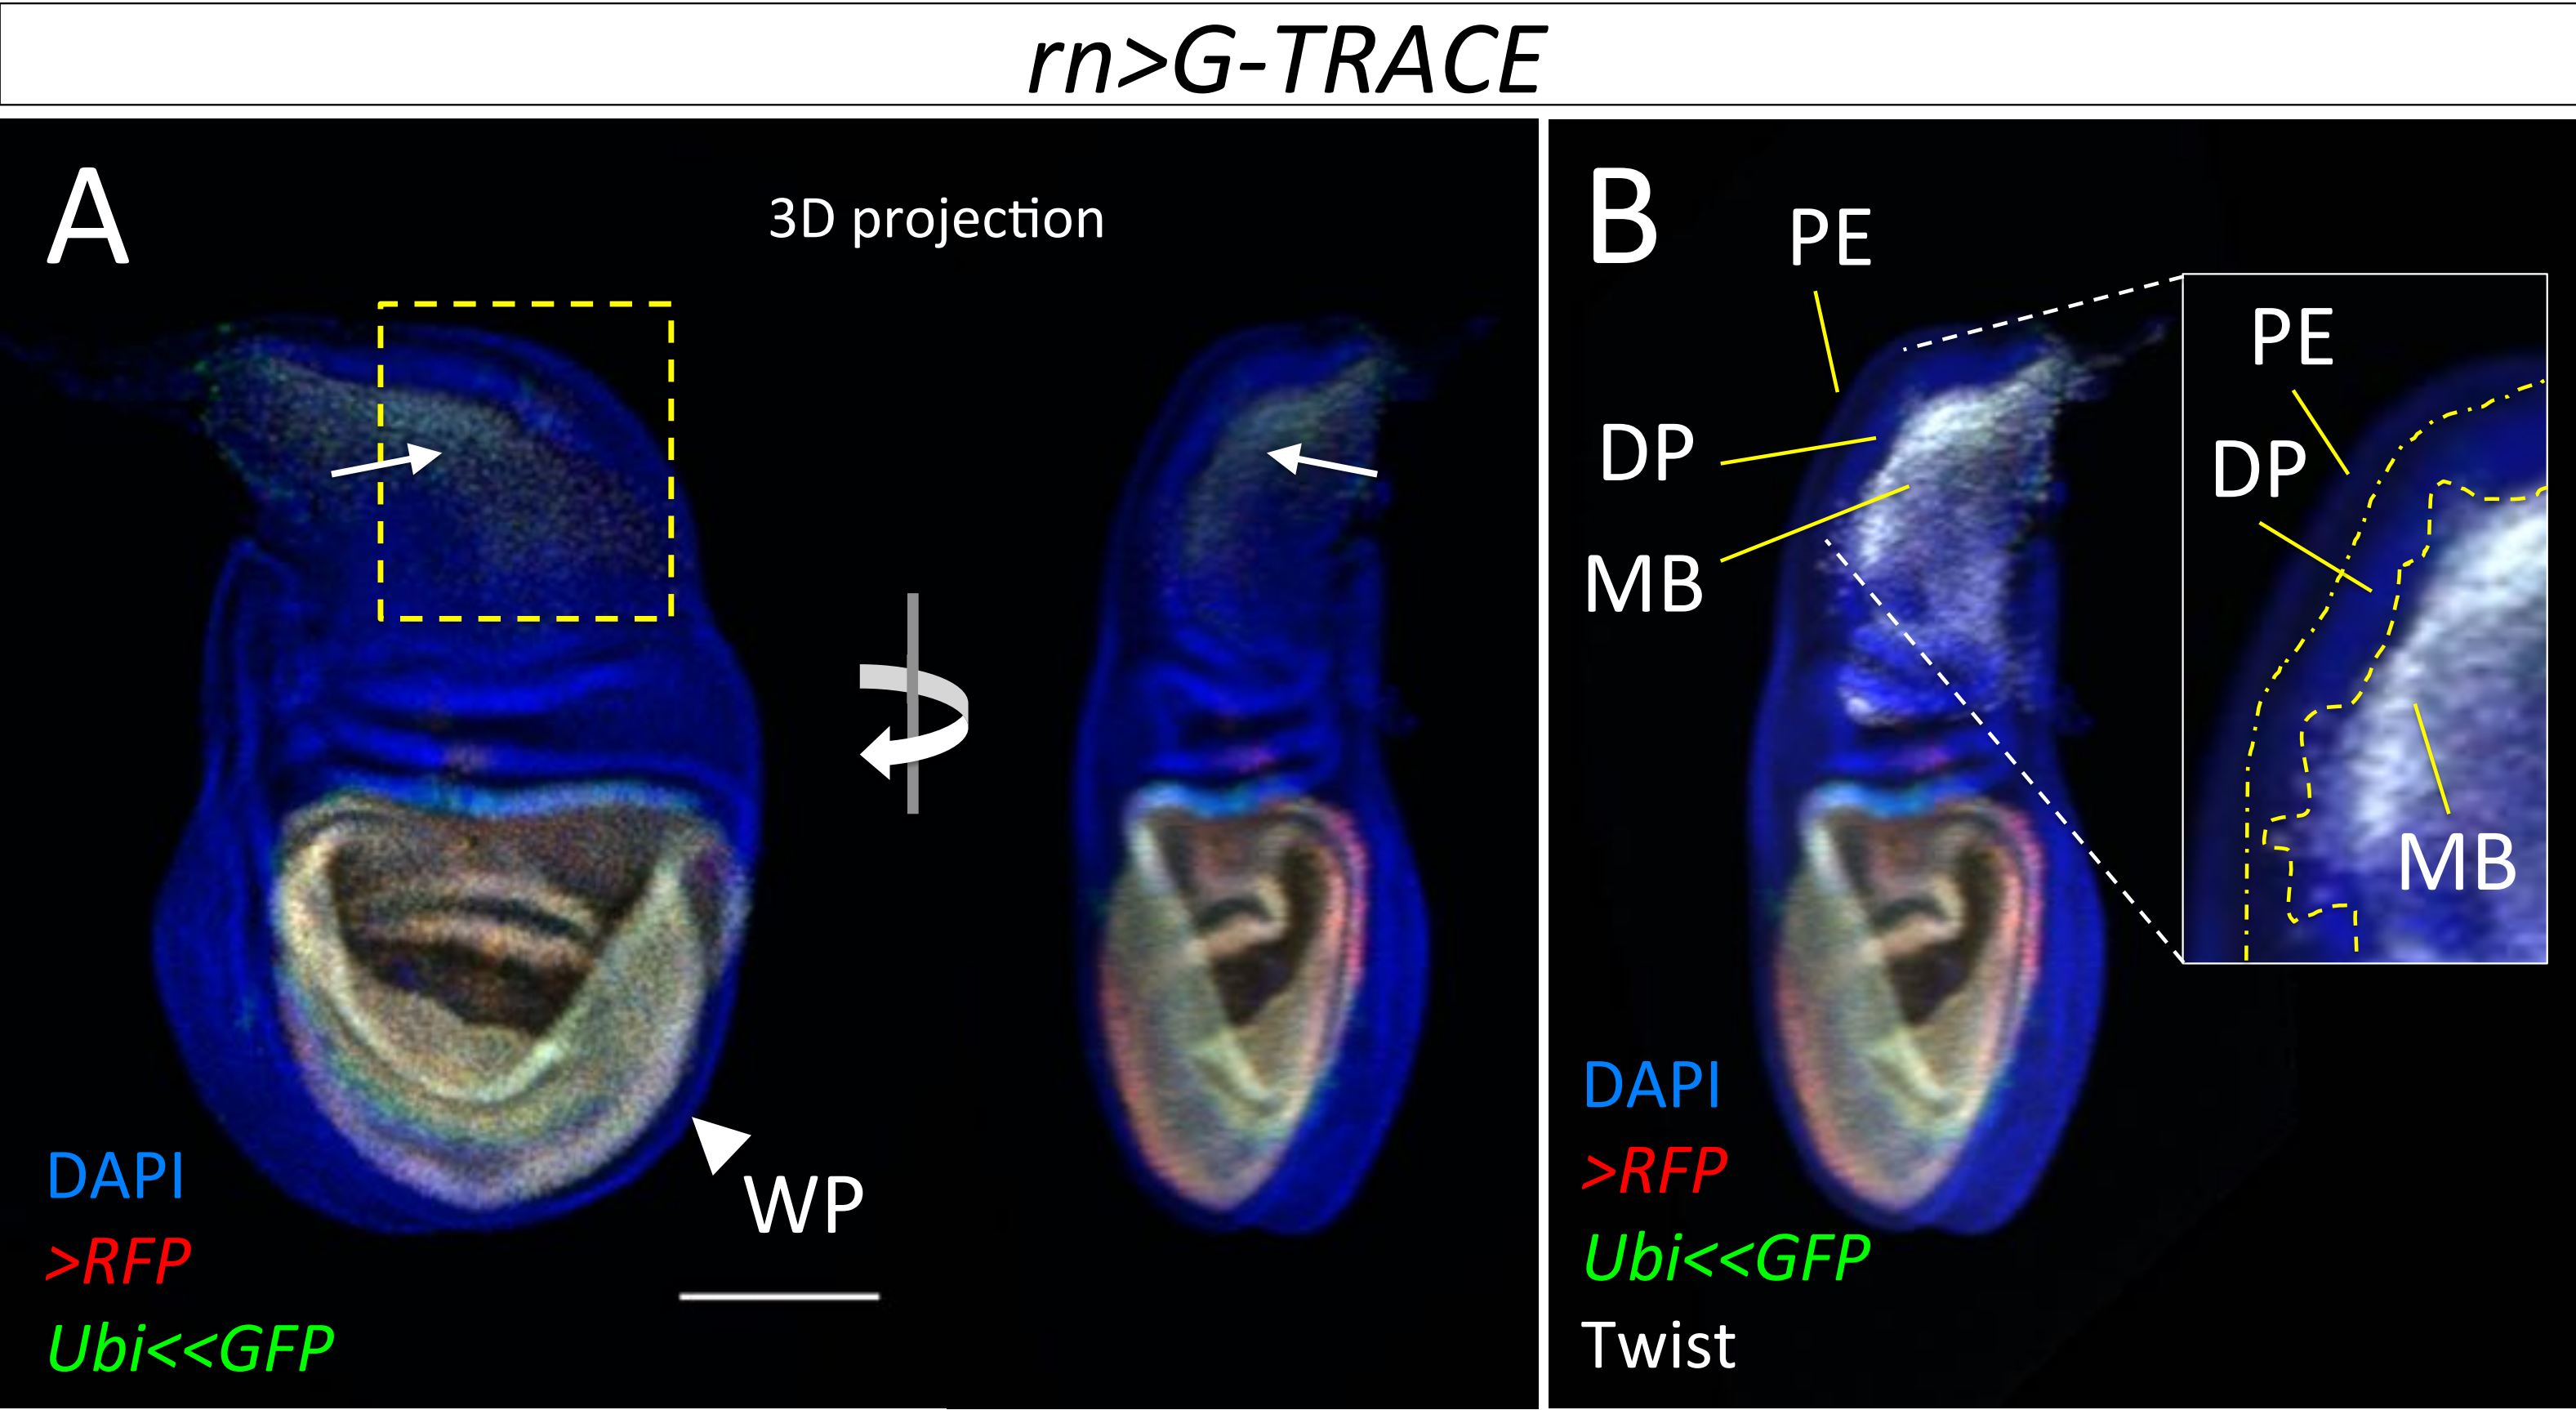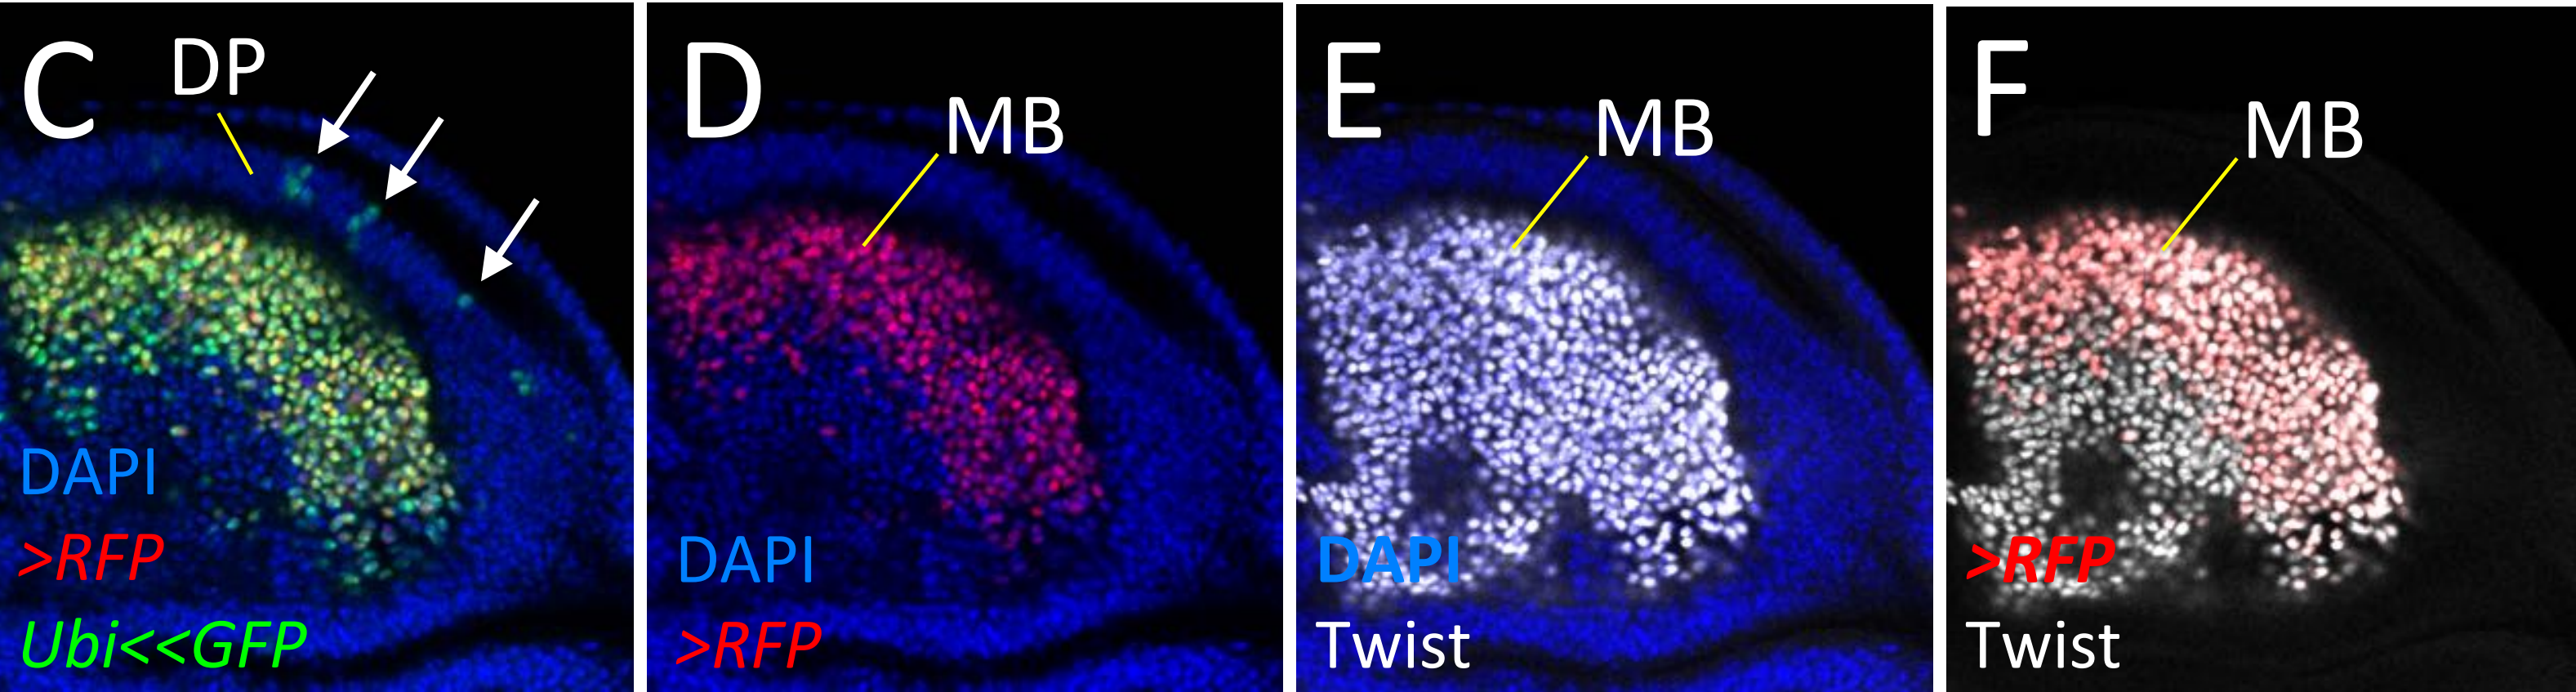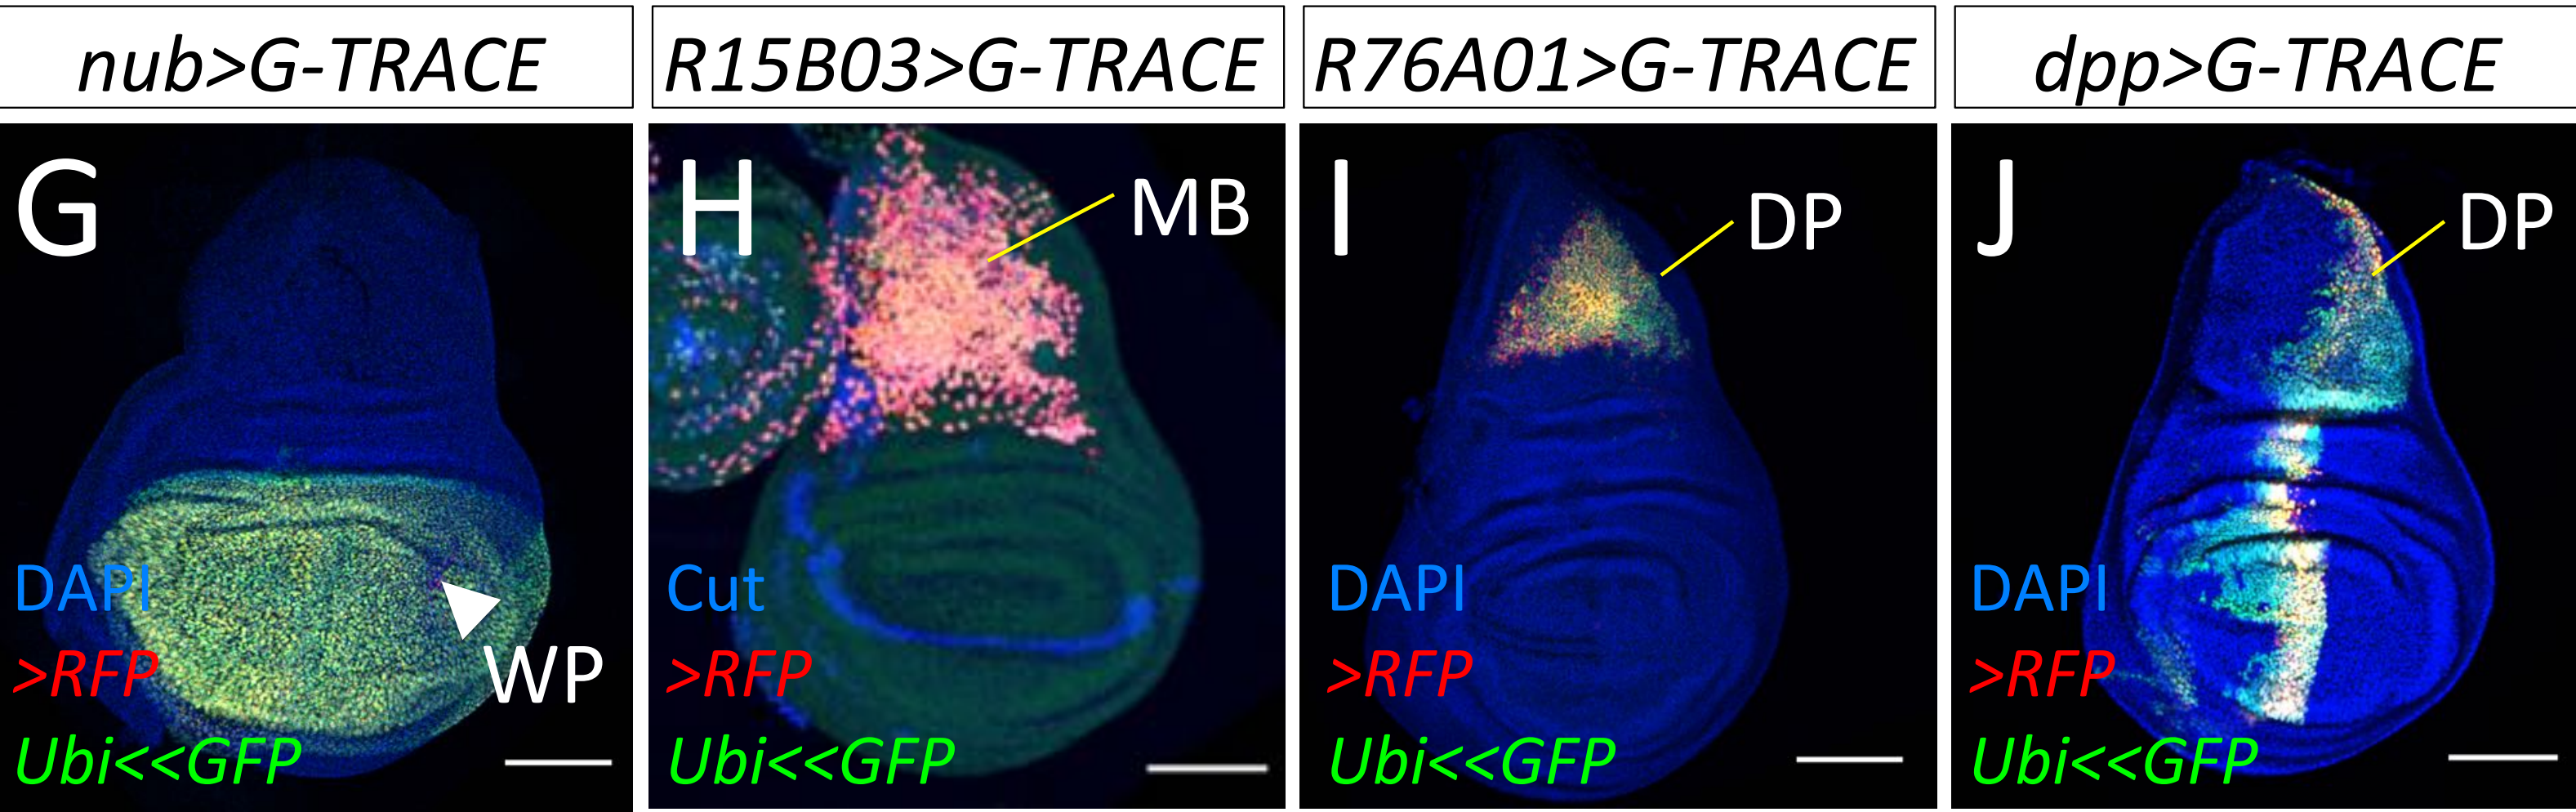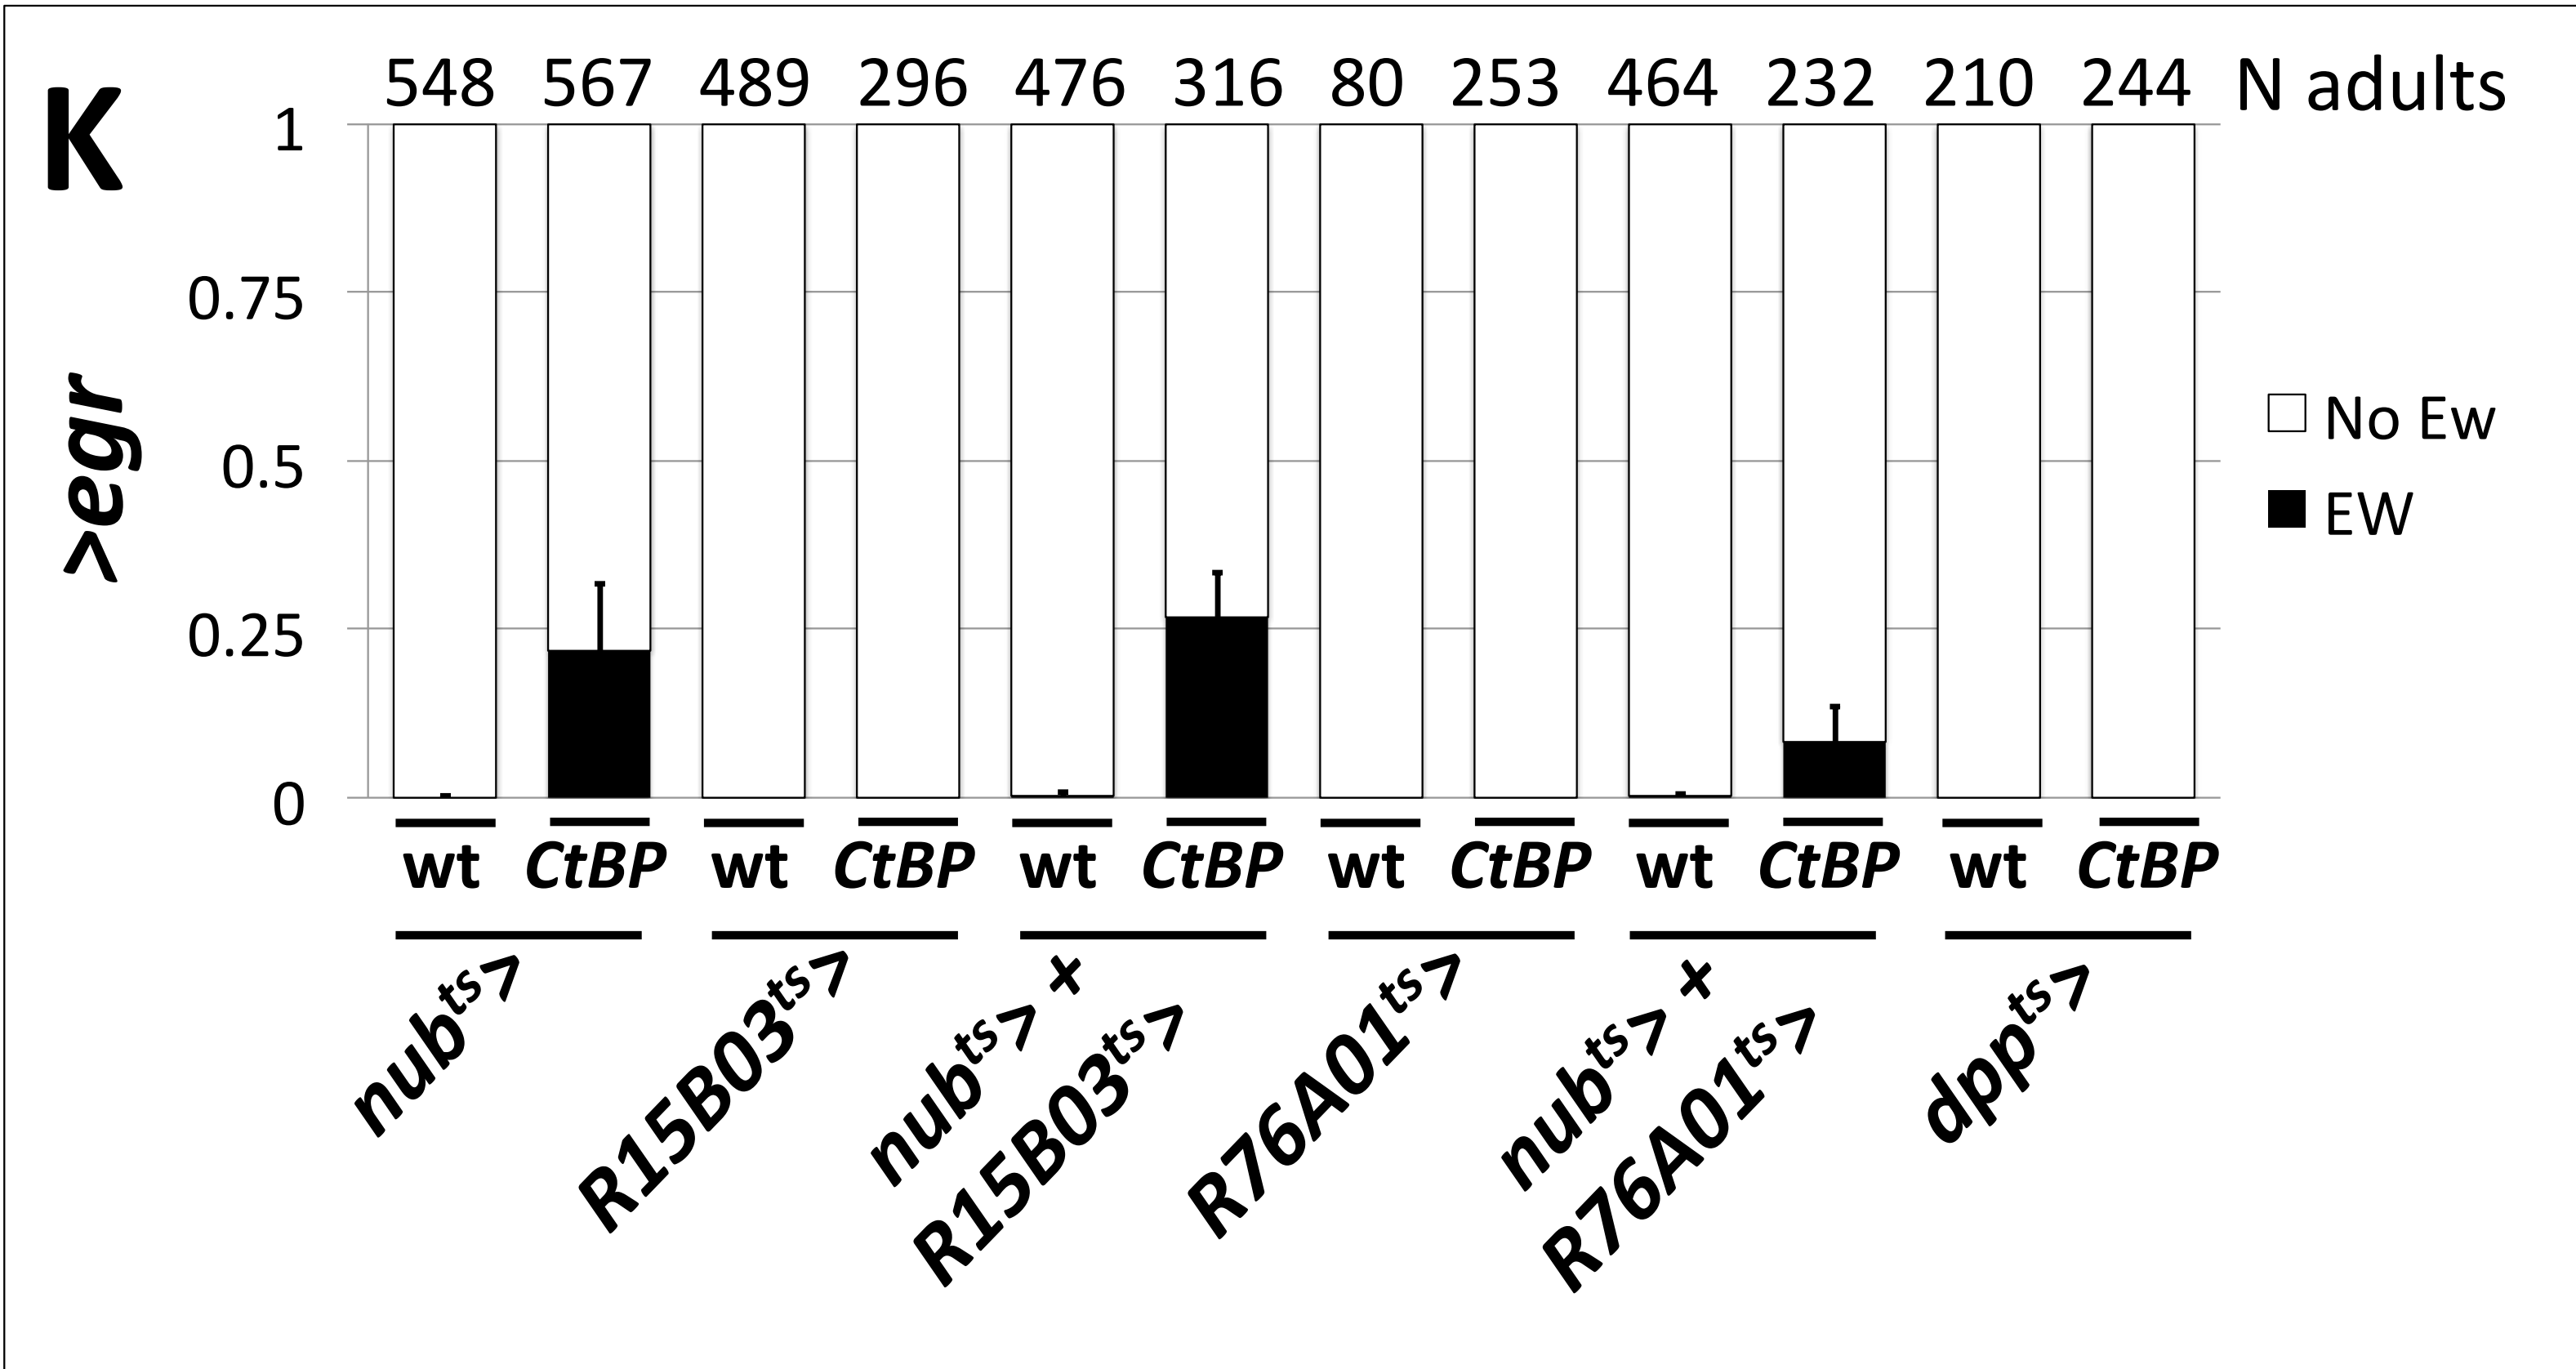

Supplement: supp [file elife-30391-supp-v1.zip]

*STAT-DGFP, CtBP<sup>Q229\*/+</sup>, rn<sup>ts</sup>>egr* damaged

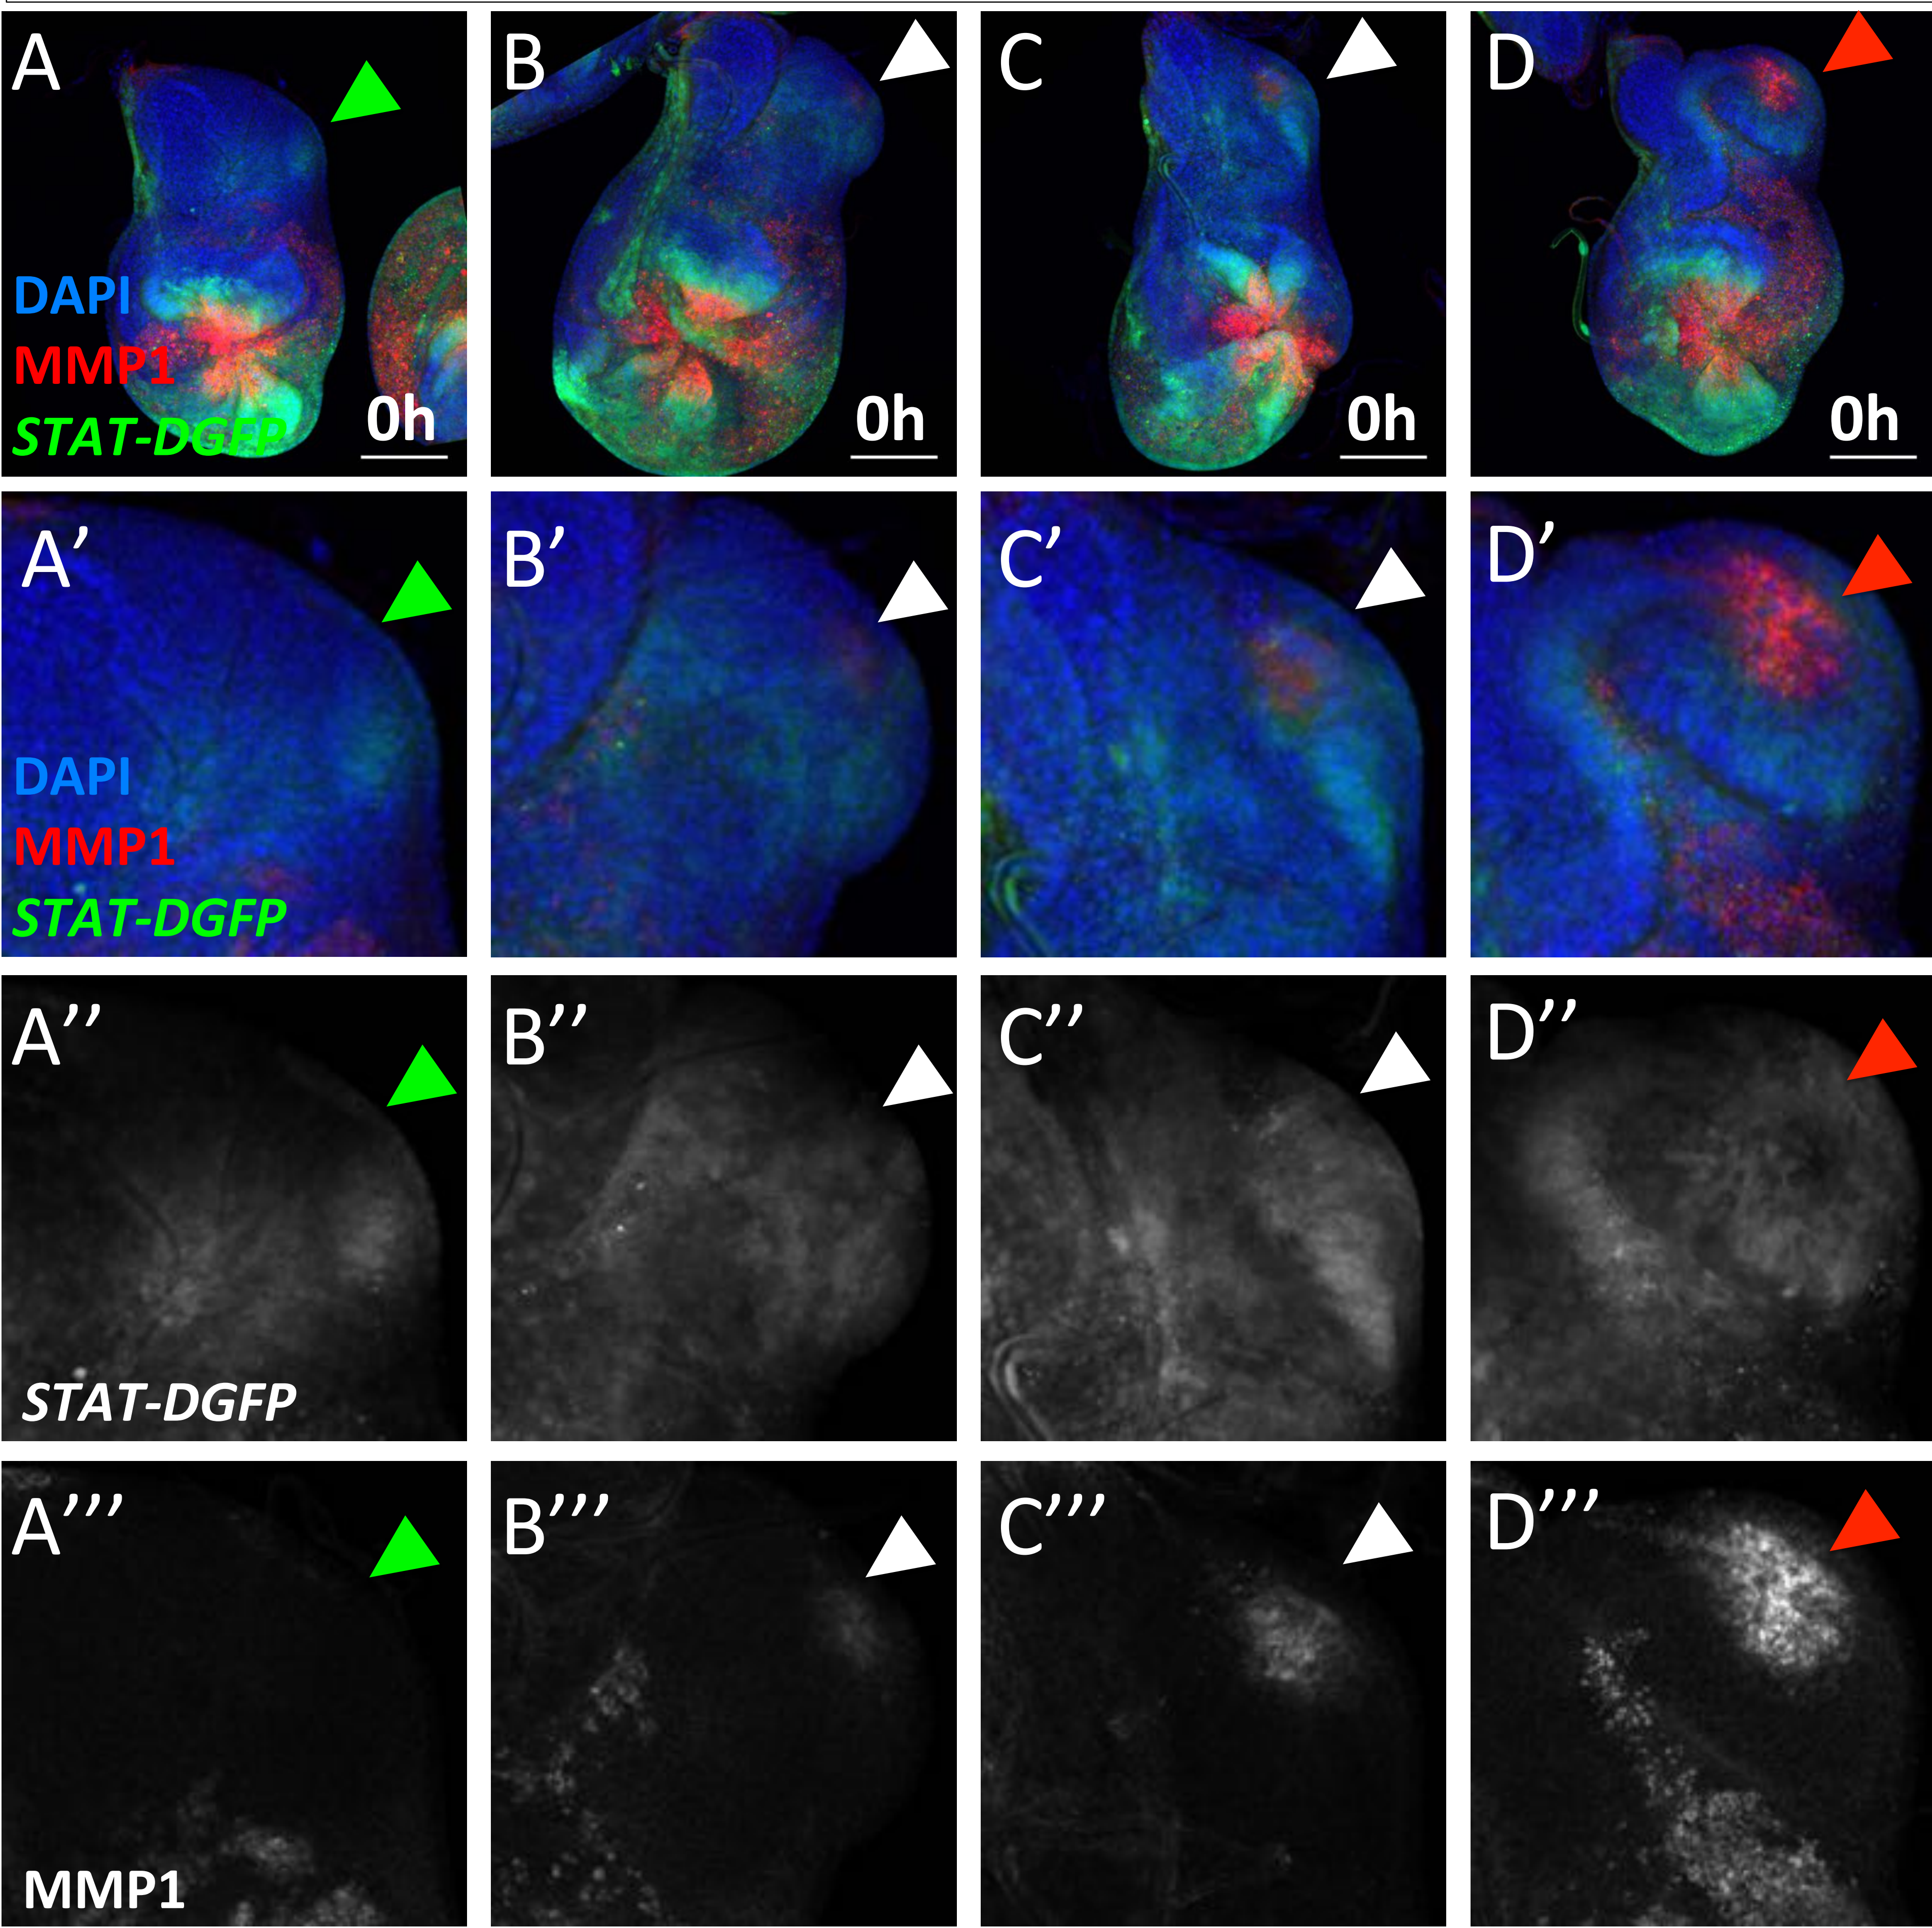

Supplement: supp [file elife-30391-supp-v1.zip]
